1 **Description of the updated nutrition calculation of the Oxford WebQ questionnaire and**  
2 **comparison with the previous version among 207,144 participants in UK Biobank**

3 Authors:

4 Aurora Perez-Cornago<sup>1</sup>, Zoe Pollard<sup>1</sup>, Heather Young<sup>1</sup>, Marloes van Uden<sup>2</sup>, Colm Andrews<sup>1</sup>, Carmen  
5 Piernas<sup>3</sup>, Tim J Key<sup>1</sup>, Angela Mulligan<sup>2,4\*</sup>, Marleen Lentjes<sup>2,5\*</sup>

6 <sup>1</sup>Cancer Epidemiology Unit, Nuffield Department of Population Health, University of Oxford, UK

7 <sup>2</sup>Department of Public Health & Primary Care, Institute of Public Health, University of Cambridge,  
8 UK

9 <sup>3</sup>Nuffield Department of Primary Care Health Sciences, University of Oxford, UK

10 <sup>4</sup>NIHR BRC Diet, Anthropometry and Physical Activity Group, MRC Epidemiology Unit, University  
11 of Cambridge, UK

12 <sup>5</sup>School of Medical Sciences, Clinical Epidemiology & Biostatistics, Örebro University, Sweden

13 \*These authors have contributed equally

14

15 **Correspondence to:** Dr Aurora Perez-Cornago, Cancer Epidemiology Unit, Nuffield Department of  
16 Population Health, University of Oxford, Richard Doll Building, Roosevelt Drive, Oxford, OX3 7LF,  
17 United Kingdom. TEL: +44 (0)1865 289600; FAX: +44 (0)1865 289610;

18 Email: [aurora.perez-cornago@ndph.ox.ac.uk](mailto:aurora.perez-cornago@ndph.ox.ac.uk)

19

20 **Abstract**

21 **Purpose:** The Oxford WebQ is a web-based 24-hour dietary assessment method which has been used  
22 in UK Biobank and other large prospective studies. The food composition table used to calculate  
23 nutrient intakes has recently been replaced with the UK Nutrient Databank, which has food  
24 composition data closer in time to when participants completed the questionnaire, and new dietary  
25 variables were incorporated. Here we describe the updated version of the Oxford WebQ questionnaire  
26 nutrient calculation, and compare nutrient intakes with the previous version used.

27 **Methods:** 207,144 UK Biobank participants completed  $\geq 1$  Oxford WebQs, and means and standard  
28 deviations of nutrient intakes were averaged for all completed 24-h dietary assessments. Spearman  
29 correlations and weighted kappa statistics were used to compare the re-classification and agreement of  
30 nutrient intakes between the two versions.

31 **Results:** 35 new nutrients were incorporated in the updated version. Compared to the previous  
32 version, most nutrients were very similar in the updated version except for a few nutrients which  
33 showed a difference of  $>10\%$ : lower with the new version for trans-fat ( $-20\%$ ), and vitamin C ( $-15\%$ ),  
34 but higher for retinol ( $+42\%$ ), vitamin D ( $+26\%$ ) and vitamin E ( $+20\%$ ). Most participants were in the  
35 same ( $>60\%$ ) or adjacent ( $>90\%$ ) quintile of intake for the two versions. Except for trans-fat ( $r=0.58$ ,  
36  $\kappa=0.42$ ), very high correlations were found between the nutrients calculated using the two versions  
37 ( $r>0.79$  and  $\kappa>0.60$ ).

38 **Conclusion:** Small absolute differences in nutrient intakes were observed between the two versions,  
39 and the ranking of individuals was minimally affected, except for trans-fat.

40

41 **Keywords:** online 24-hour dietary assessment, Oxford WebQ, UK Biobank, comparative study, food  
42 composition table.

43

44 **Declarations:**

45 **Funding:** This research received no specific grant from any funding agency, commercial or not-for-  
46 profit sectors. APC is supported by a Cancer Research UK Population Research Fellowship  
47 (C60192/A28516) and by the World Cancer Research Fund (WCRF UK), as part of the World Cancer  
48 Research Fund International grant programme (2019/1953).

49

50 **Conflicts of interest:** The authors declare that there are no conflicts of interest

51

52 **Ethics approval:** The UK Biobank study was conducted according to the guidelines laid down in the  
53 Declaration of Helsinki and approved by the North West Multi-Centre Research Ethics Committee  
54 (reference number 06/MRE08/65).

55

56 **Consent to participate:** All participants gave informed consent to participate and be followed-up  
57 through data-linkage at recruitment.

58

59 **Availability of data and material:** UK Biobank is an open access resource. Bona fide researchers  
60 can apply to use the UK Biobank data set by registering and applying at <http://www.ukbio>  
61 [bank.ac.uk/register-apply](http://www.ukbio.bank.ac.uk/register-apply) .

62

63 **Acknowledgements:** The food composition data used in this paper were taken from the National Diet  
64 and Nutrition Survey (NDNS) and accessed with kind permission of the UK Data Service. We wish to  
65 express our gratitude to the participants and those involved in building the UK Biobank resource. This  
66 work has been conducted using the UK Biobank Resource under Application Number 24494. We  
67 would also like to thank researchers involved in the previous versions of the Oxford WebQ  
68 questionnaire.

69

## 70 **Introduction**

71 Traditional methods to determine dietary intake in large prospective studies, such as paper-based food  
72 frequency questionnaires (FFQ) and/or interviewer administered 24-h recalls, are costly and time-  
73 consuming. Recently, self-administered online 24-h dietary assessments have been incorporated in  
74 some large prospective studies and been shown to facilitate data analyses and decrease the researcher  
75 burden, including data entry and data coding, by automatically calculating nutrient intakes (1).

76 The Oxford WebQ is a fully automated web-based 24-hour dietary assessment tool which seeks  
77 information from participants about their consumption of food and drink during the previous 24 hours  
78 (2). This online questionnaire has already been used by several large-scale cohort studies, such as the  
79 UK Biobank (3) and the Million Women Study (4), as it is easy and quick (~12 minutes) to self-  
80 complete and suitable for repeated use in large-scale prospective studies. Moreover, nutrients are  
81 automatically estimated via built-in algorithms and food composition data. Until now, the food  
82 composition table (FCT) used for the Oxford WebQ has been the UK McCance and Widdowson's  
83 "The Composition of Foods 6<sup>th</sup> edition (2002) and its supplements (5-15), of which 550 of 1,200  
84 foods were incorporated into the Oxford WebQ. This FCT has now been replaced by the UK Nutrient  
85 Databank (UKNDB) (2013), which provides food composition data measured closer in time to when  
86 participants completed the questionnaire in UK Biobank (2009-2012) and contains over 5,600 foods,  
87 of which 681 food codes have been incorporated (16, 17). The UKNDB is commissioned by Public  
88 Health England as part of the National Diet and Nutrition Survey (NDNS), and is available in  
89 electronic format as an integrated dataset, and contains up-to-date nutrient composition data. Data in  
90 the UKNDB is very similar to the UK McCance and Widdowson's FCT but includes a larger range of  
91 processed foods and composite dishes. As well as replacing the FCT used to calculate nutrient intakes,  
92 we have made other changes such as some changes in portion sizes, personalisation of fats used in  
93 cooking, and updating the underlying program code for the nutrient calculation, and new dietary  
94 variables such as energy density, and animal and plant fats and proteins, have been incorporated. This  
95 paper describes the main changes made to nutrient estimation for the Oxford WebQ questionnaire,  
96 and compares the two versions of obtained nutrient intakes in over 200,000 UK Biobank participants.

97

## 98 **Methods**

### 99 *Study design*

100 UK Biobank includes a total 211,031 participants aged 40-69 years who have completed the Oxford  
101 WebQ dietary assessment at least once between 2009 and 2012. Details about the UK Biobank study  
102 can be found elsewhere (3). Briefly, participants provided detailed information on a range of

103 sociodemographic, physical, lifestyle, and health-related factors via self-completed touch-screen  
104 questionnaires and a computer assisted personal interview at recruitment (3).

105 The study protocol and information about data access are available online  
106 (<http://www.ukbiobank.ac.uk/wp-content/uploads/2011/11/UK-Biobank-Protocol.pdf>) and in the  
107 literature (18).

#### 108 *Dietary assessment – The Oxford WebQ questionnaire*

109 The Oxford WebQ questionnaire was developed to obtain information on the quantities of up to 206  
110 types of foods and 32 types of drinks consumed over the previous day (24 hours;  
111 <https://biobank.ctsu.ox.ac.uk/crystal/crystal/docs/DietWebQ.pdf>) (2). The quantity of each food or  
112 drink consumed is calculated by multiplying the assigned portion size (**Supplementary Table 1**) of  
113 each food or beverage by the amount consumed (19). This questionnaire has recently been validated;  
114 compared to recovery biomarkers for energy, protein and potassium, and was considered to perform  
115 well in approximating true dietary intake (20). This questionnaire also provided similar mean  
116 estimates of energy and nutrient intakes when compared with an interviewer administered 24-h  
117 dietary recall(2). Further information about the Oxford WebQ can be found here  
118 <https://www.ceu.ox.ac.uk/research/oxford-webq>

119 For the previous version of calculating nutrient intakes for the Oxford WebQ, the UK McCance and  
120 Widdowson's 6<sup>th</sup> edition (2002) FCT and its supplements were used(2). The nutrients determined  
121 were total energy intake, total protein, total fat, saturated fatty acids (SFA), monounsaturated fatty  
122 acids (MUFA), polyunsaturated fatty acids (PUFA), cholesterol, carbohydrates, total sugars, fibre,  
123 alcohol, calcium, iron, magnesium, potassium, carotene, vitamin B6, vitamin B12, vitamin C, vitamin  
124 D and vitamin E. Details about the nutrient calculation can be found in **Supplementary Table 2**.  
125 Trans fatty acids (TFA) and retinol in the previous version of the nutrient calculation were excluded  
126 since there were multiple food codes with missing values; for the purpose of comparison, illustration  
127 of the consequences of missing data, and because TFA have a public health impact, we are however  
128 presenting the results from the previous calculation here.

129 For the updated version of the nutrient calculation of the Oxford WebQ, nutrient intakes were  
130 calculated using the UKNDB FCT from survey year 6, which includes FCT for years 2012-2013 and  
131 2013-2014. Moreover, changes in allocated portion sizes, personalisation of milk types and fats used  
132 in cooking, gluten free versions and the underlying code for nutrient calculation were revised and  
133 updated (details in **Supplementary Methods, Table 1**, and **Supplementary Tables 2 and 3**). Except  
134 for total PUFA, all the nutrients available in the previous version are also available in the UKNDB  
135 (and total PUFA can be calculated by adding n-3 and n-6 PUFA). Moreover, the following further  
136 dietary variables are now available: energy density, animal protein, plant protein, animal fat, plant fat,  
137 MUFA, n-3 PUFA, n-6 PUFA, free sugars, non-free sugars, non-milk extrinsic sugars, intrinsic and

138 milk sugars, fructose, glucose, sucrose, lactose, maltose, other sugars, alpha-carotene, beta-carotene,  
139 beta cryptoxanthin, vitamin a (retinol equivalents), biotin, chloride, copper, haem iron, non-haem iron,  
140 iodine, manganese, sodium, niacin equivalent, pantothenic acid, selenium, total nitrogen and zinc.

141

#### 142 *Participants*

143 A subsample of UK Biobank participants recruited towards the end of the recruitment period (from  
144 April 2009 to September 2010) was invited to complete the Oxford WebQ questionnaire. Moreover,  
145 those who provided email addresses were invited to complete the Oxford WebQ a total of four times  
146 every 3-4 months on variable days of the week during the follow-up period (online cycle 1, February  
147 2011 to April 2011; online cycle 2, June 2011 to September 2011; online cycle 3, October 2011 to  
148 December 2011; online cycle 4, April 2012 to June 2012). 24-h dietary assessments with extreme  
149 energy intakes (men: <3,347 or >17,573 kJ/d or <800 or >4200 kcal/d); women: <2,092 or >14,644  
150 kJ/d or <600 or >3500 kcal/d)(21) as calculated with either version of the FCT, were excluded. For  
151 this reason, 3887 participants were excluded because they did not have a valid WebQ. In this analysis,  
152 we are not interested in usual intakes for individuals but in comparing the estimates of intakes of the  
153 participants in the completed 24-h dietary assessments, therefore we have not excluded participants  
154 with only one dietary assessment. However, researchers using this dietary assessment tool for diet-  
155 disease associations are advised to use at least two 24-h dietary assessments (but more if possible),  
156 since intakes from one 24-h dietary assessment are unlikely to reflect usual intakes(20). A total of  
157 207,144 (out of 211,031, 98%) participants were included in this study.

#### 158 *Statistical analyses*

159 The WebQ results were averaged for all completed 24-h dietary questionnaire for each participant.  
160 Means, standard deviations (SDs), and the 5<sup>th</sup> and 95<sup>th</sup> percentiles of nutrient intakes are given. The  
161 differences and percentage difference (see equation) in nutrient intakes between the previous and the  
162 updated version of the nutrient calculation were determined, and means were compared using paired t-  
163 tests or Wilcoxon's rank sum test, depending on the normality of the distribution.

$$\% \text{ difference} = \frac{(\text{updated} - \text{previous})}{\text{previous}} * 100\%$$

164 The Spearman correlations of the nutrient data were calculated. Participants were divided into fifths of  
165 intake for each nutrient in the two versions of the nutrient calculation and weighted kappa statistics  
166 and the percentage of participants who were categorised into the same or adjacent fifth were  
167 calculated, since most prospective studies on diet and disease risk examine associations by comparing  
168 disease incidence in categories of the dietary factor of interest. Weighted kappas should be interpreted

169 as follows: values  $\leq 0$  indicates no agreement, 0.01–0.20 as none to slight, 0.21–0.40 as fair, 0.41–  
170 0.60 as moderate, 0.61–0.80 as substantial, and 0.81–1.00 as almost perfect agreement (22).

171 All analyses were conducted using the STATA statistical software package version 14 (Stata  
172 Corporation, College Station, TX, USA).

173

## 174 **Results**

175 The mean age at recruitment was 56 years (SD=8) and 55% were women. Participants completed on  
176 average 2.14 (SD=1.16) 24h dietary assessments. **Table 2** shows the mean, median, percentiles, and  
177 mean differences of energy and nutrient intakes in the two versions. There were small but significant  
178 differences (likely due to the large sample size) in the mean nutrient intakes between the existing  
179 version and the updated version. Compared to the previous version, intakes in the updated version  
180 were >10% different for the following nutrients: lower for TFA (-20%), vitamin C (-15%) and iron (-  
181 9.5%), but higher for retinol (+42%), vitamin D (+26%) and vitamin E (+20%). SFA and TFA intakes  
182 provided 12.4% and 0.63% from total energy intake in the previous version of the nutrient calculation,  
183 while they provided 11.6% and 0.52% respectively in the updated version.

184 A total of 35 new nutrients and exposures of interest were available in the UKNDB, and intakes of  
185 these nutrients in this population are displayed in **Table 3**.

186 **Table 4** shows the correlations and the strengths of agreement on ranking nutrient intakes between the  
187 previous and the updated version. Except for TFA ( $r=0.58$ ) and some of the fat-soluble vitamins, high  
188 correlations ( $r>0.90$ ) were found between nutrients calculated using the two versions: energy ( $r=0.96$ ),  
189 protein ( $r=0.97$ ), total fat ( $r=0.95$ ), carbohydrates ( $r=0.95$ ), saturated fat ( $r=0.91$ ), total sugars  
190 ( $r=0.96$ ), and fibre ( $r=0.94$ ), with the strongest correlation being for alcohol intake ( $r=0.99$ ). The  
191 percentage of agreement between the two versions was generally good, with the majority of the  
192 nutrients classified into the same or adjacent fifth ranging from 90.7 % for retinol ( $\kappa= 0.64$ ) to 99.3%  
193 for protein ( $\kappa= 0.88$ ); however, the percentage agreement was lower for TFA (76.3 %,  $\kappa= 0.42$ ), and  
194 slightly lower for vitamin E (88.1 %,  $\kappa= 0.60$ ) and vitamin B6 (89.7 %,  $\kappa= 0.63$ ). The full list of  
195 nutrients and the categorization of participants into fifths based on the previous and the updated  
196 version is shown in **Tables 5 and 6**.

197

## 198 **Discussion**

199 We have described the updated version of the Oxford WebQ 24-h dietary assessment and compared it  
200 with the previous version of this questionnaire among participants in UK Biobank. In general, small

201 absolute mean differences in nutrient intakes between the two versions were observed, and the  
202 ranking of individuals was minimally affected for most nutrients. The only substantial differences  
203 were observed for TFA and vitamin C, for which intakes in the updated version were lower and for  
204 retinol, vitamin D and E, for which intakes were higher. We have incorporated new dietary variables,  
205 which will allow researchers to assess whether they are related to non-communicable diseases. Also,  
206 with this update, we have made it easier for future users to continue this updating process using future  
207 releases of the UKNDB.

208 After categorising the nutrient intakes, there was very high agreement between the two versions for  
209 total energy intake and macronutrients. The closest agreement was observed for alcohol intake, for  
210 which 100% of the participants were in the same or adjacent fifth, followed by total protein. As  
211 expected, intakes of TFA were lower in the updated version of the nutrient calculation and there was  
212 moderate agreement with the previous version. Most TFA in the diet are produced when converting  
213 vegetable oils into semi-solid fats during the process of partial hydrogenation. TFA are well  
214 established risk factors for cardiovascular disease (23), and the food industry has voluntarily reduced  
215 or eliminated some artificial TFA in processed foods in the UK in the last fifteen years (24). The  
216 previous version used FCT in which nutrient content was published from foods chemically analysed  
217 up to 2002 (including analytic data pre-dating the publication date), and therefore, the 'true' TFA  
218 intake in 2009-2012, when the participants completed the Oxford WebQ, was likely lower (25). This  
219 previous version also had substantial missing data for TFA, and for this reason this nutrient was not  
220 released in UK Biobank. The lower mean TFA intake in the updated version is likely an  
221 underestimated difference due to previous missing data on TFA, and also due to food reformulation  
222 over time and/or the different imputations of TFA between the two FCT versions of the nutrient  
223 calculation. The main sources of TFA in the previous version were likely to be fat spreads and  
224 desserts and biscuits, while in the updated version they are likely to be mainly naturally occurring  
225 TFA in food produced from ruminant animals. Intakes of TFA are below the dietary reference value  
226 of <2% of total energy, and values are consistent with those reported by the UK NDNS (26).

227 Intakes of SFAs were also lower in the updated version of the nutrient calculation, but with high  
228 agreement in ranking between the two versions. One of the major contributors to SFA in this cohort is  
229 dairy fat spread, and therefore it is possible that the decrease in SFA may be due to the decrease of 20  
230 to 60% in the portion sizes allocated for some spreads in the revised version (e.g. spreads on  
231 crispbreads, slices of bread, bread rolls, and oatcakes, see supplement for more details).

232 There were also differences in vitamin intakes between the two versions. Vitamin C intake was on  
233 average 17% lower in the updated version compared to the previous version. When vitamin C intake  
234 was divided into fifths, the majority of the participants remained classified in the same or an adjacent  
235 category. The decrease in vitamin C may be due to fruit juice, which is the largest source of vitamin C



236 in this cohort and in which the previous version of the questionnaire had a concentrated fruit juice  
237 code not sufficiently diluted with water. On the other hand, we observed an increase in the intake  
238 estimates of retinol and vitamins D and E, although there was substantial agreement between the two  
239 versions when these nutrients were categorised. This may be due to the incorporation of fats used  
240 when cooking in this updated version, which were mainly vegetable oils; increases in vitamin D may  
241 also have occurred due to increases in food fortification, although no fortified foods were preferred  
242 when allocating food codes to the WebQ items. Moreover, differences in micronutrient content  
243 between the different FCTs are to be expected even if these FCT were created from similar sources;  
244 this may be due to for example food reformulation, re-analysis of foods resulting in differences due to  
245 storage conditions, fortification or season when the food was sampled. Lastly, imputation of missing  
246 values in the UKNDB may have contributed to changes in the nutrient intakes observed (27).

247 Among the new dietary variables that have been incorporated in this updated version, are MUFAs, n-3  
248 and n-6 PUFAs. The UKNDB does not have information on total essential PUFAs, but n-3 and n-6  
249 fatty acids account for the vast majority of PUFAs in the diet; therefore, researchers using this  
250 resource could sum these two fatty acids as a proxy of total PUFA. Other dietary variables that have  
251 been incorporated are animal and plant fat and protein, and free sugars. The mean intake of free  
252 sugars in this population is slightly above the recommended value of <10% of total energy intake by  
253 the World Health Organization (28).

254 This study has some strengths and limitations. The updated FCT has over three times more food codes  
255 than the previous one, which allowed for a better matching between reported food intakes and nutrient  
256 composition. This updated version of the nutrient calculation was developed to improve accuracy -and  
257 in very few cases also validity (where the original food code did not accurately match the food  
258 description in the WebQ) of the dietary intakes of the participants when they completed the  
259 questionnaire, and so it is expected to decrease measurement error. Non-differential misclassification  
260 of dietary intakes may attenuate the relationship in diet-disease associations in prospective studies  
261 (29). However, it should be emphasized that, as in all questionnaire-based assessments of dietary  
262 intake, there will be some measurement error, especially systematic bias due to underreporting (20).

263 In conclusion, we have described an updated version of the nutrient calculation of the Oxford WebQ  
264 24-h dietary assessment and compared it with the previous version. Small absolute group differences  
265 in nutrient intakes between the two versions were observed and the ranking of individuals was  
266 minimally affected for most nutrients. The greatest differences were observed for TFA and vitamin C,  
267 for which intakes in the updated version were lower; and for retinol, vitamin D and E, for which the  
268 reported intakes were higher. This updated version of the nutrient calculation was developed to  
269 improve accuracy and personalisation of the dietary intakes of the participants and therefore, some

270 reduction in non-differential misclassification in diet-disease associations is expected. This new  
271 version of the nutrient calculation and new dietary variables will be returned to UK Biobank.

272 **References**

- 273 1. Hooson Jzh J, Hutchinson Jyh J, Warthon-Medina M, et al. A systematic review of reviews  
274 identifying UK validated dietary assessment tools for inclusion on an interactive guided website for  
275 researchers: [www.nutritools.org](http://www.nutritools.org) . Crit Rev Food Sci Nutr. 2019;1-25.  
276 doi:10.1080/10408398.2019.1566207
- 277 2. Liu B, Young H, Crowe FL, et al. Development and evaluation of the Oxford WebQ, a low-  
278 cost, web-based method for assessment of previous 24 h dietary intakes in large-scale prospective  
279 studies. Public Health Nutr. 2011;14(11):1998-2005. doi:10.1017/S1368980011000942
- 280 3. Fry A, Littlejohns TJ, Sudlow C, et al. Comparison of Sociodemographic and Health-Related  
281 Characteristics of UK Biobank Participants With Those of the General Population. Am J Epidemiol.  
282 2017;186(9):1026-34. doi:10.1093/aje/kwx246
- 283 4. Green J, Reeves GK, Floud S, et al. Cohort Profile: the Million Women Study. Int J  
284 Epidemiol. 2019;48(1):28-9e. doi:10.1093/ije/dyy065
- 285 5. Holland B, Unwin ID, Buss DH. Cereals and cereal products. Third supplement to McCance  
286 and Widdowson's The composition of foods, 4th edition. Royal Society of Chemistry: Cambridge.  
287 1988.
- 288 6. Holland B, Unwin ID, Buss D. Milk products and eggs. Fourth supplement to McCance and  
289 Widdowson's The composition of foods, 4th edition. Royal Society of Chemistry: Cambridge. 1989.
- 290 7. Holland B, Welch AA, Unwin ID, Buss DH, Paul AA, Southgate D. McCance and  
291 Widdowson's The composition of foods, 5th edition. Royal Society of Chemistry: Cambridge. 1991.
- 292 8. Holland B, Unwin ID, Buss DH. Vegetables, herbs and spices. Fifth supplement to McCance  
293 and Widdowson's The composition of foods, 4th edition. . Royal Society of Chemistry: Cambridge.  
294 1991.
- 295 9. Holland B, Unwin ID, Buss DH. Fruit and nuts. First supplement to McCance and  
296 Widdowson's The composition of foods, 5th edition Royal Society of Chemistry: Cambridge. 1992.
- 297 10. Holland B, Welch AA, Buss DH. Vegetable dishes. Second supplement to McCance and  
298 Widdowson's The composition of foods, 5th edition. Royal Society of Chemistry: Cambridge. 1992.
- 299 11. Holland B, Brown J, Buss DH. Fish and fish products. Third supplement to McCance and  
300 Widdowson's The composition of foods, 5th edition. Royal Society of Chemistry: Cambridge. 1993.

- 301 12. Chan W, Brown J, Buss DH. Miscellaneous foods. Fourth supplement to McCance and  
302 Widdowson's The composition of foods, 5th edition. . Royal Society of Chemistry: Cambridge. 1994.
- 303 13. Chan W, Brown J, Lee SM, Buss DH. Meat, poultry and game. Fifth supplement to McCance  
304 and Widdowson's The composition of foods, 5th edition. Royal Society of Chemistry: Cambridge.  
305 1995.
- 306 14. Chan W, Brown J, Church SM, Buss DH. Meat products and dishes. Sixth supplement to  
307 McCance and Widdowson's The composition of foods, 5th edition. Royal Society of Chemistry:  
308 Cambridge. 1996.
- 309 15. Agency FS. McCance and Widdowson's The composition of foods, sixth summary edition.  
310 Royal Society of Chemistry: Cambridge. 2002.
- 311 16. Swan G, Dodhia S, Farron-Wilson M, Powell N, Bush M. Food composition data and public  
312 health. *Nutr Bull.* 2015;40(3):223-6. doi:10.1111/mbu.12156
- 313 17. NatCen Social Research, MRC Elsie Widdowson Laboratory, University College London.  
314 Medical School. (2015). National Diet and Nutrition Survey Years 1-6, 2008/09-2013/14. [data  
315 collection]. 7th Edition. UK Data Service. SN: 6533, <http://doi.org/10.5255/UKDA-SN-6533-7>.
- 316 18. Sudlow C, Gallacher J, Allen N, et al. UK biobank: an open access resource for identifying  
317 the causes of a wide range of complex diseases of middle and old age. *PLoS Med.*  
318 2015;12(3):e1001779. doi:10.1371/journal.pmed.1001779
- 319 19. Ministry of Agriculture FaF. Food portion sizes. 2nd ed. London: HMSO. 1993.
- 320 20. Greenwood DC, Hardie LJ, Frost GS, et al. Validation of the Oxford WebQ Online 24-Hour  
321 Dietary Questionnaire Using Biomarkers. *Am J Epidemiol.* 2019;188(10):1858-67.  
322 doi:10.1093/aje/kwz165
- 323 21. Willett W. *Nutritional Epidemiology*. 3 ed. USA: Oxford University Press; 2012.
- 324 22. McHugh ML. Interrater reliability: the kappa statistic. *Biochem Med (Zagreb).*  
325 2012;22(3):276-82.
- 326 23. Mozaffarian D, Katan MB, Ascherio A, Stampfer MJ, Willett WC. Trans fatty acids and  
327 cardiovascular disease. *N Engl J Med.* 2006;354(15):1601-13. doi:10.1056/NEJMra054035
- 328 24. Coombes R. Trans fats: chasing a global ban. *BMJ.* 2011;343:d5567. doi:10.1136/bmj.d5567
- 329 25. National Diet and Nutrition Survey Years 1 to 9 of the Rolling Programme (2008/2009 –  
330 2016/2017): Time trend and income analyses. Public Health England.

331 26. Pot GK, Prynne CJ, Roberts C, et al. National Diet and Nutrition Survey: fat and fatty acid  
332 intake from the first year of the rolling programme and comparison with previous surveys. *Br J Nutr.*  
333 2012;107(3):405-15. doi:10.1017/S0007114511002911

334 27. Public Health England and Food Standards Agency. National Diet and Nutrition Survey  
335 Years 5-6 2012/13-2013/14 User Guide for UK Data.  
336 [http://doc.ukdataservice.ac.uk/doc/6533/mrdoc/pdf/6533\\_ndns\\_yrs5-6\\_uk\\_user\\_guide.pdf](http://doc.ukdataservice.ac.uk/doc/6533/mrdoc/pdf/6533_ndns_yrs5-6_uk_user_guide.pdf). Accessed  
337 07 Aug 2020.

338 28. World Health Organization; Information note about intake of sugars recommended in the  
339 WHO guideline for adults and children; available at:  
340 [https://www.who.int/nutrition/publications/guidelines/sugar\\_intake\\_information\\_note\\_en.pdf?ua=1#:](https://www.who.int/nutrition/publications/guidelines/sugar_intake_information_note_en.pdf?ua=1#:~:text=The%20World%20Health%20Organization's%20new,10%25%20of%20total%20energy%20in)  
341 [~:text=The%20World%20Health%20Organization's%20new,10%25%20of%20total%20energy%20in](https://www.who.int/nutrition/publications/guidelines/sugar_intake_information_note_en.pdf?ua=1#:~:text=The%20World%20Health%20Organization's%20new,10%25%20of%20total%20energy%20in)  
342 take. 2015.

343 29. Subar AF, Freedman LS, Tooze JA, et al. Addressing Current Criticism Regarding the Value  
344 of Self-Report Dietary Data. *J Nutr.* 2015;145(12):2639-45. doi:10.3945/jn.115.219634

345

346

**Table 1.** Major changes between the previous (McCance and Widdowson) version and the updated (Nutrient databank + other changes) version.

| Item                                   | Changes made to the updated version (Nutrient databank + other changes)                                                                                                                                                                                                                                                                                                                                                                                                                                                                                                                                                        |
|----------------------------------------|--------------------------------------------------------------------------------------------------------------------------------------------------------------------------------------------------------------------------------------------------------------------------------------------------------------------------------------------------------------------------------------------------------------------------------------------------------------------------------------------------------------------------------------------------------------------------------------------------------------------------------|
| Portion size                           | Some food items had their serving size changed to better reflect what an average portion size would be, taking into account how the question was asked (e.g. Yorkshire pudding). Some portion sizes were revised based on published data (e.g. spreads). Some portion sizes were changed to reflect the state of the food item (e.g. edible part of fruit, or inclusion of liquid for powdered items). These changes can be found in Supplementary Table 2.                                                                                                                                                                    |
| Milk type                              | We have now taken into account each milk type beyond fat content, including cholesterol lowering milk, goat's or sheep's milk, powdered milk, rice, oat, almond, coconut milk, fortified soya milk, unfortified soya milk, other milk (e.g. lactose free) as well as skimmed, semi skimmed and whole milk.<br><br>This is now applied to all hot drinks where milk is added (i.e. tea, coffee, cappuccino, latte, hot chocolate), milk-based sauces, porridge, crepes and pancakes/blinis.                                                                                                                                     |
| Type of fat used in cooking vegetables | Participants were asked to select the type of fat/oil, if any, they use in the cooking, and a total 40 different types of fat/oils were available. We have now added an amount of fat/oils in certain vegetables such as onion, mushroom, mixed veg, peppers, courgette, leek, parsnip, veg other and mashed potato which are likely to be cooked with oils/fats. These fats/oils include:<br><br>Butters, spreadable butters, hard margarine, lard, dairy spreads, polyunsaturated margarines, cholesterol lowering margarines, olive oil-based spreads, soya spreads, olive oil, rapeseed oil, sunflower oil, vegetable oil. |
| Gluten free versions                   | We have added a gluten free version where available (e.g. for baguettes, bread rolls, sliced bread, and pasta).                                                                                                                                                                                                                                                                                                                                                                                                                                                                                                                |
| Powdered milk                          | A water code was added to powdered milk codes so the food volume fits with the way the food is served (important in relation to e.g. energy density).                                                                                                                                                                                                                                                                                                                                                                                                                                                                          |
| 'Other' items                          | We studied the free text entered by the UK Biobank participants and where possible mapped the 'other' items against commonly entered foods (i.e. according to the participants' understanding of the questions). Whereas previously, these were mapped against a more generic item or a selection of items which were truly different from the specific items listed due to lack of a suitable food code.                                                                                                                                                                                                                      |

Further details about these changes can be found in Supplementary Methods and Supplementary Table 1.

**Table 2.** Comparison of total energy and nutrient intake between previous (McCance & Widdowson) and updated (Nutrient databank + other updates) datasources in 207,144 participants from UK Biobank.

| Nutrient                | Previous version: McCance & Widdowson |        |                            |                             | Updated version: Nutrient databank |        |                            |                             | Mean difference <sup>1</sup> | Percentage change, % <sup>2</sup> |
|-------------------------|---------------------------------------|--------|----------------------------|-----------------------------|------------------------------------|--------|----------------------------|-----------------------------|------------------------------|-----------------------------------|
|                         | Mean (SD)                             | Median | 5 <sup>th</sup> percentile | 95 <sup>th</sup> percentile | Mean (SD)                          | Median | 5 <sup>th</sup> percentile | 95 <sup>th</sup> percentile |                              |                                   |
| Energy (kJ/day)         | 8,675 (2,238)                         | 8,479  | 5,311                      | 12,708                      | 8,547 (2,204)                      | 8,350  | 5,250                      | 12,519                      | -128.6                       | -1.48                             |
| Protein (g/day)         | 81.3 (23.3)                           | 79.6   | 46.4                       | 121.3                       | 80.1 (22.9)                        | 78.30  | 46.07                      | 119.72                      | -1.18                        | -1.45                             |
| Total fat (g/day)       | 76.5 (27.5)                           | 73.7   | 36.6                       | 126.0                       | 72.1 (26.3)                        | 69.27  | 34.27                      | 119.49                      | -4.38                        | -5.72                             |
| SFA (g/day)             | 29.2 (11.7)                           | 27.8   | 12.7                       | 50.7                        | 26.7 (11.2)                        | 25.22  | 11.03                      | 47.19                       | -2.57                        | -8.80                             |
| PUFA (g/day)            | 14.1 (6.88)                           | 13.1   | 5.1                        | 26.8                        |                                    |        |                            |                             |                              |                                   |
| TFA (g/day)             | 1.47 (0.794)                          | 1.34   | 0.43                       | 2.93                        | 1.20 (0.649)                       | 1.08   | 0.34                       | 2.36                        | -0.29                        | -19.8                             |
| Carbohydrates (g/day)   | 249 (74.4)                            | 243    | 139                        | 381                         | 252 (72.7)                         | 246    | 143.30                     | 380.44                      | 2.45                         | 0.98                              |
| Total sugars (g/day)    | 119 (45.5)                            | 113    | 54                         | 201                         | 124 (46.3)                         | 119    | 58.32                      | 207.25                      | 5.44                         | 4.59                              |
| Englyst fibre (g/day)   | 16.3 (6.34)                           | 15.6   | 7.3                        | 27.5                        | 17.7 (6.40)                        | 17.11  | 8.44                       | 28.98                       | 1.42                         | 8.70                              |
| Alcohol (g/day)         | 16.1 (21.0)                           | 8.7    | 0.0                        | 58.5                        | 16.9 (21.7)                        | 9.05   | 0.00                       | 59.91                       | 0.74                         | 4.62                              |
| Calcium (mg/day)        | 959 (329)                             | 923    | 492                        | 1,545                       | 975 (325)                          | 942    | 509                        | 1,550                       | 16.33                        | 1.70                              |
| Iron (mg/day)           | 13.6 (4.14)                           | 13.2   | 7.3                        | 20.8                        | 12.3 (3.60)                        | 11.98  | 6.85                       | 18.55                       | -1.29                        | -9.55                             |
| Magnesium (mg/day)      | 343 (95.5)                            | 335    | 203                        | 513                         | 330 (88.4)                         | 323    | 199                        | 486                         | -13.03                       | -3.80                             |
| Potassium (mg/day)      | 3,695 (1,064)                         | 3,609  | 2,121                      | 5,553                       | 3,640 (1,007)                      | 3,571  | 2,115                      | 5,384                       | -55.20                       | -1.49                             |
| Retinol (µg/day)        | 323 (169)                             | 300    | 89                         | 641                         | 461 (884)                          | 305    | 89                         | 880                         | 137.2                        | 42.0                              |
| Total carotene (µg/day) | 3,091 (2,583)                         | 2,522  | 316                        | 7,876                       | 2,959 (2,791)                      | 2,095  | 334                        | 8,063                       | -131.8                       | -4.26                             |
| Folate (µg/day)         | 301 (107.2)                           | 287    | 152                        | 496                         | 310 (104)                          | 300    | 160                        | 493                         | 9.79                         | 3.26                              |
| Vitamin B6 (mg/day)     | 2.16 (0.691)                          | 2.11   | 1.13                       | 3.36                        | 2.05 (0.664)                       | 1.99   | 1.09                       | 3.23                        | -0.11                        | -5.07                             |
| Vitamin B12 (µg/day)    | 6.47 (4.49)                           | 5.39   | 1.64                       | 14.90                       | 6.11 (3.25)                        | 5.56   | 2.21                       | 11.66                       | -0.36                        | -5.61                             |
| Vitamin C (mg/day)      | 150 (102)                             | 131    | 30                         | 338                         | 127 (76.5)                         | 115    | 29                         | 266                         | -23.35                       | -15.53                            |
| Vitamin D (µg/day)      | 2.85 (2.71)                           | 2.02   | 0.34                       | 8.92                        | 3.60 (2.866)                       | 2.83   | 0.66                       | 9.45                        | 0.75                         | 26.24                             |
| Vitamin E (mg/day)      | 9.01 (3.98)                           | 8.47   | 3.60                       | 16.27                       | 10.8 (4.26)                        | 10.30  | 4.85                       | 18.54                       | 1.80                         | 19.99                             |

All mean differences were statistically significant from zero when using paired t-tests or Wilcoxon's rank sum test (P<0.05).

<sup>1</sup> Calculated as the difference of the mean (UK Nutrient Databank - McCance & Widdowson).

<sup>2</sup> Calculated as the difference of the mean (UK Nutrient Databank - McCance & Widdowson) divided by their mean and multiplied by 100.

Abbreviations: PUFA, polyunsaturated fatty acids; SFA, saturated fatty acids; TFA, trans fatty acids.

**Table 3.** New nutrients incorporated in the updated version (Nutrient databank + other updates) data source in 207,144 participants from UK Biobank.

| Nutrient                                 | Updated version: Nutrient databank + other updates |        |                            |                             |
|------------------------------------------|----------------------------------------------------|--------|----------------------------|-----------------------------|
|                                          | Mean (SD)                                          | Median | 5 <sup>th</sup> percentile | 95 <sup>th</sup> percentile |
| Energy density (kJ/g per day)*           | 6.47 (1.67)                                        | 6.28   | 4.10                       | 9.45                        |
| Animal protein (g/day)*                  | 52.1 (20.6)                                        | 51.00  | 20.55                      | 87.00                       |
| Plant protein (g/day)*                   | 28.0 (9.84)                                        | 26.78  | 14.42                      | 45.56                       |
| Animal fat (g/day)*                      | 40.4 (18.7)                                        | 37.89  | 14.63                      | 74.62                       |
| Plant fat (g/day)*                       | 31.7 (15.3)                                        | 29.45  | 11.30                      | 59.78                       |
| MUFA (g/day)                             | 26.1 (10.2)                                        | 24.92  | 11.74                      | 44.55                       |
| n-3 PUFA (g/day)                         | 1.97 (0.966)                                       | 1.79   | 0.77                       | 3.75                        |
| n-6 PUFA (g/day)                         | 10.80 (4.86)                                       | 10.02  | 4.41                       | 19.70                       |
| Free sugar (% daily energy intake)       | 11.8 (5.8)                                         | 11     | 3.7                        | 22.1                        |
| Free sugars (g/day)*                     | 60.0 (34.7)                                        | 54.31  | 15.09                      | 123.73                      |
| Non-free sugars (g/day)*                 | 63.9 (30.3)                                        | 59.99  | 22.70                      | 118.40                      |
| Non-milk extrinsic sugars (g/day)        | 64 (35)                                            | 59     | 18                         | 128                         |
| Intrinsic and milk sugars (g/day)        | 60 (27)                                            | 57     | 22                         | 108                         |
| Fructose (g/day)                         | 28 (14)                                            | 26     | 8.33                       | 53                          |
| Glucose (g/day)                          | 26 (13)                                            | 25     | 8.96                       | 49                          |
| Sucrose (g/day)                          | 47 (24)                                            | 43     | 16                         | 91                          |
| Lactose (g/day)                          | 14 (8)                                             | 13     | 2.68                       | 27                          |
| Maltose (g/day)                          | 6.67 (6.85)                                        | 4.69   | 1.15                       | 20.17                       |
| Other sugars (g/day)                     | 2.30 (2.89)                                        | 1.63   | 0.04                       | 6.32                        |
| Alpha-carotene (µg/day)                  | 516 (644)                                          | 266    | 3.60                       | 1,651                       |
| Beta-carotene (µg/day)                   | 2,615 (2,415)                                      | 1,887  | 303                        | 7,024                       |
| Beta cryptoxanthin (µg/day)              | 172 (378)                                          | 103    | 6.6                        | 386                         |
| Vitamin A (retinol equivalents) (µg/day) | 954 (999)                                          | 729    | 241                        | 2,243                       |
| Biotin (µg/day)                          | 43 (16)                                            | 40     | 22                         | 71                          |
| Chloride (mg/day)                        | 3,351 (1,135)                                      | 3,201  | 1,779                      | 5,418                       |
| Copper (mg/day)                          | 1.37 (0.49)                                        | 1.31   | 0.75                       | 2.22                        |
| Iron, haem (mg/day)                      | 0.60 (0.49)                                        | 0.50   | 0                          | 1.44                        |
| Iron, non-haem (mg/day)                  | 12 (3.5)                                           | 11     | 6.4                        | 18                          |
| Iodine (µg/day)                          | 209 (100)                                          | 190    | 91                         | 392                         |
| Manganese (mg/day)                       | 4.20 (1.46)                                        | 4.07   | 2.07                       | 6.79                        |
| Sodium (mg/day)                          | 1,937 (735)                                        | 1,831  | 946                        | 3,288                       |
| Niacin equivalent (mg/day)               | 38 (11)                                            | 37     | 21                         | 57                          |
| Pantothenic acid (mg/day)                | 461 (884)                                          | 305    | 89                         | 880                         |
| Selenium (µg/day)                        | 52 (24)                                            | 48     | 23                         | 95                          |
| Total nitrogen (g/day)                   | 12 (4)                                             | 12     | 7.3                        | 19                          |
| Zinc (mg/day)                            | 9.65 (3.12)                                        | 9.32   | 5.24                       | 15.1                        |

\*Nutrients not available in the Nutrient databank food composition tables (please see details in Supplementary methods).

Abbreviations: PUFA, polyunsaturated fatty acids; MUFA, monounsaturated fatty acids.



**Table 4.** Comparison of total energy and nutrient intake between previous (McCance & Widdowson) and updated (Nutrient databank + other updates) in 207,144 participants from UK Biobank.

| <b>Nutrient</b> | <b>Spearman's r</b> | <b>Percentage in the same fifth</b> | <b>Percentage in the same or adjacent fifth</b> | <b>Weighted k</b> |
|-----------------|---------------------|-------------------------------------|-------------------------------------------------|-------------------|
| Energy          | 0.962               | 78.7                                | 98.9                                            | 0.86              |
| Protein         | 0.973               | 81.4                                | 99.3                                            | 0.88              |
| Total fat       | 0.952               | 71.1                                | 98.8                                            | 0.81              |
| SFA             | 0.908               | 62.3                                | 96.5                                            | 0.74              |
| PUFA            | 0.887               | 58.2                                | 94.6                                            | 0.71              |
| TFA             | 0.583               | 37.6                                | 76.3                                            | 0.42              |
| Carbohydrates   | 0.952               | 77.1                                | 98.5                                            | 0.84              |
| Total sugars    | 0.959               | 77.8                                | 98.6                                            | 0.85              |
| Englyst fibre   | 0.935               | 67.8                                | 97.6                                            | 0.79              |
| Alcohol         | 0.990               | 93.0                                | 100.0                                           | 0.96              |
| Calcium         | 0.935               | 72.4                                | 97.6                                            | 0.81              |
| Iron            | 0.939               | 67.5                                | 98.2                                            | 0.79              |
| Magnesium       | 0.957               | 76.4                                | 98.7                                            | 0.84              |
| Potassium       | 0.945               | 76.1                                | 98.1                                            | 0.84              |
| Total carotene  | 0.894               | 61.4                                | 95.2                                            | 0.73              |
| Folate          | 0.914               | 64.0                                | 96.5                                            | 0.76              |
| Vitamin B6      | 0.813               | 50.7                                | 89.7                                            | 0.63              |
| Vitamin B12     | 0.911               | 65.4                                | 96.2                                            | 0.76              |
| Vitamin C       | 0.955               | 73.6                                | 98.8                                            | 0.83              |
| Vitamin D       | 0.856               | 58.2                                | 92.6                                            | 0.69              |
| Vitamin E       | 0.790               | 48.9                                | 88.1                                            | 0.60              |
| Retinol         | 0.797               | 52.5                                | 90.7                                            | 0.64              |

Abbreviations: PUFA, polyunsaturated fatty acids; SFA, saturated fatty acids; TFA, trans fatty acids.

**Table 5.** Dietary intakes of energy, macronutrients and fibre by fifths, shaded cells depict participants categorised into the same (dark shading) or adjacent (light shading) quintile using the previous (McCance and Widdowson) and the updated (Nutrient databank + other updates).

| McCance & Widdowson | Nutrient databank |       |       |       |       |       |
|---------------------|-------------------|-------|-------|-------|-------|-------|
|                     | Q1                | Q2    | Q3    | Q4    | Q5    |       |
| Energy              | Q1                | 36733 | 4665  | 31    | 0     | 0     |
|                     | Q2                | 3993  | 30595 | 6767  | 74    | 0     |
|                     | Q3                | 310   | 5368  | 28870 | 6857  | 24    |
|                     | Q4                | 216   | 502   | 5198  | 30468 | 5045  |
|                     | Q5                | 177   | 299   | 563   | 4030  | 36359 |
| Protein             | Q1                | 37372 | 3993  | 60    | 8     | 1     |
|                     | Q2                | 3644  | 31928 | 5707  | 147   | 9     |
|                     | Q3                | 260   | 5015  | 30318 | 5738  | 87    |
|                     | Q4                | 115   | 373   | 5032  | 31775 | 4134  |
|                     | Q5                | 38    | 120   | 312   | 3761  | 37197 |
| Total fat           | Q1                | 34662 | 6470  | 285   | 12    | 1     |
|                     | Q2                | 6334  | 26253 | 8291  | 542   | 12    |
|                     | Q3                | 352   | 8115  | 24532 | 8139  | 288   |
|                     | Q4                | 72    | 545   | 8039  | 26702 | 6072  |
|                     | Q5                | 9     | 46    | 282   | 6034  | 35055 |
| SFA                 | Q1                | 31964 | 8772  | 695   | 24    | 1     |
|                     | Q2                | 7780  | 21682 | 10825 | 1145  | 23    |
|                     | Q3                | 1181  | 8997  | 20100 | 10583 | 543   |
|                     | Q4                | 322   | 1613  | 8728  | 22546 | 8196  |
|                     | Q5                | 182   | 365   | 1081  | 7131  | 32665 |
| PUFA                | Q1                | 32247 | 7891  | 1155  | 162   | 22    |
|                     | Q2                | 7920  | 20889 | 10325 | 2121  | 161   |
|                     | Q3                | 1032  | 9851  | 18163 | 10885 | 1527  |
|                     | Q4                | 230   | 2640  | 9728  | 19162 | 9605  |
|                     | Q5                | 0     | 158   | 2058  | 9099  | 30113 |
| Trans fat           | Q1                | 21416 | 11056 | 5480  | 2528  | 952   |
|                     | Q2                | 9227  | 12235 | 11027 | 6678  | 2259  |
|                     | Q3                | 5256  | 8651  | 10975 | 11114 | 5433  |
|                     | Q4                | 3371  | 5940  | 8458  | 12098 | 11562 |
|                     | Q5                | 2159  | 3547  | 5489  | 9011  | 21222 |
| Carbohydrates       | Q1                | 36743 | 4619  | 68    | 1     | 0     |
|                     | Q2                | 3877  | 30279 | 7083  | 190   | 2     |
|                     | Q3                | 323   | 5400  | 28052 | 7553  | 101   |
|                     | Q4                | 171   | 643   | 5414  | 29232 | 5966  |
|                     | Q5                | 315   | 488   | 812   | 4453  | 35359 |
| Total sugars        | Q1                | 36650 | 4658  | 125   | 0     | 0     |
|                     | Q2                | 4105  | 30422 | 6677  | 222   | 0     |
|                     | Q3                | 384   | 5360  | 28604 | 7003  | 84    |
|                     | Q4                | 181   | 725   | 5206  | 29710 | 5600  |
|                     | Q5                | 109   | 264   | 817   | 4494  | 35744 |
| Fibre               | Q1                | 34324 | 5742  | 1284  | 124   | 7     |
|                     | Q2                | 6974  | 25127 | 7195  | 1974  | 121   |
|                     | Q3                | 130   | 10274 | 22479 | 7607  | 941   |
|                     | Q4                | 1     | 286   | 10342 | 24472 | 6313  |
|                     | Q5                | 0     | 0     | 129   | 7252  | 34046 |
| Alcohol             | Q1                | 60178 | 10935 | 0     | 0     | 0     |
|                     | Q2                | 0     | 11793 | 259   | 0     | 0     |
|                     | Q3                | 0     | 139   | 40345 | 638   | 0     |
|                     | Q4                | 0     | 0     | 638   | 39902 | 1086  |
|                     | Q5                | 0     | 0     | 0     | 894   | 40337 |

**Table 6.** Dietary intakes of micronutrients by fifths, shaded cells depict participants categorised into the same (dark shading) or adjacent (light shading) quintile using the previous (McCance and Widdowson) and the updated (Nutrient databank + other updates).

| McCance & Widdowson |    | Nutrient databank |       |       |       |       |
|---------------------|----|-------------------|-------|-------|-------|-------|
|                     |    | Q1                | Q2    | Q3    | Q4    | Q5    |
| Calcium             | Q1 | 35086             | 5995  | 324   | 21    | 3     |
|                     | Q2 | 5182              | 27500 | 8217  | 514   | 16    |
|                     | Q3 | 592               | 6404  | 25658 | 8556  | 219   |
|                     | Q4 | 252               | 987   | 6076  | 27321 | 6793  |
|                     | Q5 | 317               | 543   | 1154  | 5017  | 34397 |
| Iron                | Q1 | 34455             | 6617  | 340   | 29    | 4     |
|                     | Q2 | 6431              | 25072 | 9176  | 717   | 32    |
|                     | Q3 | 456               | 8723  | 22514 | 9330  | 450   |
|                     | Q4 | 79                | 901   | 8786  | 24273 | 7331  |
|                     | Q5 | 8                 | 116   | 613   | 7080  | 33611 |
| Magnesium           | Q1 | 36096             | 5185  | 135   | 11    | 2     |
|                     | Q2 | 4619              | 29361 | 7215  | 220   | 14    |
|                     | Q3 | 401               | 5959  | 27600 | 7342  | 127   |
|                     | Q4 | 199               | 616   | 5901  | 29274 | 5439  |
|                     | Q5 | 114               | 308   | 578   | 4582  | 35846 |
| Potassium           | Q1 | 36175             | 5120  | 126   | 8     | 0     |
|                     | Q2 | 4189              | 29675 | 7306  | 249   | 10    |
|                     | Q3 | 453               | 5370  | 27678 | 7806  | 122   |
|                     | Q4 | 244               | 737   | 5322  | 28938 | 6188  |
|                     | Q5 | 368               | 527   | 998   | 4427  | 35108 |
| Total carotene      | Q1 | 32723             | 7724  | 918   | 61    | 3     |
|                     | Q2 | 6177              | 22394 | 12223 | 628   | 7     |
|                     | Q3 | 1827              | 7805  | 18824 | 12804 | 169   |
|                     | Q4 | 528               | 2881  | 7315  | 21359 | 9346  |
|                     | Q5 | 174               | 625   | 2149  | 6577  | 31903 |
| Folate              | Q1 | 33310             | 7139  | 818   | 138   | 25    |
|                     | Q2 | 7253              | 23369 | 9152  | 1494  | 162   |
|                     | Q3 | 694               | 9324  | 21043 | 9371  | 995   |
|                     | Q4 | 163               | 1336  | 9264  | 22636 | 8035  |
|                     | Q5 | 9                 | 261   | 1152  | 7790  | 32211 |
| Vitamin B6          | Q1 | 29035             | 8510  | 2670  | 987   | 351   |
|                     | Q2 | 9986              | 17130 | 9117  | 3817  | 1302  |
|                     | Q3 | 2088              | 11861 | 15030 | 9109  | 3378  |
|                     | Q4 | 300               | 3575  | 12173 | 16528 | 9157  |
|                     | Q5 | 20                | 353   | 2439  | 10988 | 27240 |
| Vitamin B12         | Q1 | 33554             | 7017  | 629   | 186   | 55    |
|                     | Q2 | 6186              | 24337 | 9809  | 954   | 131   |
|                     | Q3 | 1065              | 7555  | 21670 | 10689 | 451   |
|                     | Q4 | 450               | 2098  | 8167  | 22957 | 7757  |
|                     | Q5 | 174               | 422   | 1154  | 6643  | 33034 |
| Vitamin C           | Q1 | 35989             | 5271  | 166   | 5     | 0     |
|                     | Q2 | 5196              | 28350 | 7507  | 371   | 3     |
|                     | Q3 | 197               | 7060  | 26016 | 7955  | 202   |
|                     | Q4 | 47                | 659   | 6898  | 27399 | 6425  |
|                     | Q5 | 0                 | 89    | 842   | 5699  | 34798 |
| Vitamin D           | Q1 | 27879             | 9222  | 3256  | 888   | 184   |
|                     | Q2 | 10441             | 18571 | 9591  | 2609  | 238   |
|                     | Q3 | 2318              | 10541 | 18136 | 9516  | 897   |
|                     | Q4 | 652               | 2715  | 9490  | 22276 | 6371  |
|                     | Q5 | 140               | 379   | 956   | 6140  | 33738 |
| Vitamin E           | Q1 | 27402             | 9723  | 3263  | 967   | 206   |
|                     | Q2 | 10047             | 16007 | 10095 | 4240  | 908   |
|                     | Q3 | 2826              | 10878 | 14262 | 10367 | 3193  |
|                     | Q4 | 717               | 3930  | 10837 | 16227 | 9628  |
|                     | Q5 | 437               | 891   | 2972  | 9628  | 27493 |
| Retinol             | Q1 | 28876             | 7468  | 2386  | 857   | 1322  |
|                     | Q2 | 10585             | 18290 | 7516  | 2607  | 1912  |
|                     | Q3 | 1753              | 12618 | 16394 | 7145  | 2994  |
|                     | Q4 | 202               | 2868  | 13135 | 17935 | 6767  |
|                     | Q5 | 13                | 185   | 1998  | 12885 | 25826 |
