# Supplementary material for: Description of the updated nutrition calculation of the Oxford WebQ questionnaire and comparison with the previous version among 207,144 participants in UK Biobank
Source: bioRxiv or medRxiv preprint supplement (doi:10.1101/2020.11.30.20240713), 2020-11-30
Supplement: Supplementary file [file media-1.pdf]

**Supplementary Table 1.** Variable description, portion sizes, and differences between each food item in the WebQ between version 1 (McCance and Widdowson) and version 2 (Nutrient databank + other changes).

|                                                                                                                             | McCance and Widdowson's                          | Portion size | Nutrient databank + other changes                   | Portion size | Portion size | Portion size                                                                                                                                       |
|-----------------------------------------------------------------------------------------------------------------------------|--------------------------------------------------|--------------|-----------------------------------------------------|--------------|--------------|----------------------------------------------------------------------------------------------------------------------------------------------------|
| Variable description                                                                                                        | Food item                                        |              | Food item                                           |              |              | Description of differences with previous version                                                                                                   |
| Salt added to food                                                                                                          | add_salt                                         |              | 4:add_salt                                          | 1:           | -75%         | More realistic portion size for daily amount of 'salt at the table'; qualitative measure, this is the same quantity for everyone responding 'yes'. |
| Alcoholic drinks: beer, lager or cider                                                                                      | alcohol_beercider                                |              | 574:alcohol_beercider                               | 574:         | 0%           |                                                                                                                                                    |
| Alcoholic drinks: other drinks (e.g. cream liqueurs, medium or high strength liqueurs)                                      | alcohol_other                                    |              | 25:alcohol_other                                    | 25:          | 0%           | Mapped to liqueurs                                                                                                                                 |
| Alcoholic drinks: spirits                                                                                                   | alcohol_spirits                                  |              | 23:alcohol_spirits                                  | 23:          | 0%           |                                                                                                                                                    |
| Alcoholic drinks: sherry, port, fortified wine                                                                              | alcohol_wine_fort                                |              | 50:alcohol_wine_fort                                | 50:          | 0%           |                                                                                                                                                    |
| Alcoholic drinks: red wine                                                                                                  | alcohol_wine_red_large                           |              | 250:alcohol_wine_red_large                          | 250:         | 0%           |                                                                                                                                                    |
| Alcoholic drinks: red wine                                                                                                  | alcohol_wine_red_med                             |              | 175:alcohol_wine_red_med                            | 175:         | 0%           |                                                                                                                                                    |
| Alcoholic drinks: red wine                                                                                                  | alcohol_wine_red_small                           |              | 125:alcohol_wine_red_small                          | 125:         | 0%           |                                                                                                                                                    |
| Alcoholic drinks: rose wine, sparkling rose wine                                                                            | alcohol_wine_rose_large                          |              | 250:alcohol_wine_rose_large                         | 250:         | 0%           |                                                                                                                                                    |
| Alcoholic drinks: rose wine, sparkling rose wine                                                                            | alcohol_wine_rose_med                            |              | 175:alcohol_wine_rose_med                           | 175:         | 0%           |                                                                                                                                                    |
| Alcoholic drinks: rose wine, sparkling rose wine                                                                            | alcohol_wine_rose_small                          |              | 125:alcohol_wine_rose_small                         | 125:         | 0%           |                                                                                                                                                    |
| Alcoholic drinks: white wine, sparkling white wine                                                                          | alcohol_wine_white_large                         |              | 250:alcohol_wine_white_large                        | 250:         | 0%           |                                                                                                                                                    |
| Alcoholic drinks: white wine, sparkling white wine                                                                          | alcohol_wine_white_med                           |              | 175:alcohol_wine_white_med                          | 175:         | 0%           |                                                                                                                                                    |
| Alcoholic drinks: white wine, sparkling white wine                                                                          | alcohol_wine_white_small                         |              | 125:alcohol_wine_white_small                        | 125:         | 0%           |                                                                                                                                                    |
| Biscuits or cookies with chocolate or half coated in chocolate                                                              | biscuit_choc                                     |              | 17:biscuit_choc                                     | 17:          | 0%           |                                                                                                                                                    |
| Fully coated chocolate biscuits, can include cream or wafer filling                                                         | biscuit_choccov                                  |              | 24:biscuit_choccov                                  | 24:          | 0%           |                                                                                                                                                    |
| Fully coated chocolate biscuits, can include cream or wafer filling                                                         |                                                  |              | biscuit_choccov_gf                                  | 24:          |              | :Gluten free version added to the updated version (however no gluten free code available at the time so the non-gluten free code was used)         |
| Biscuits or cookies with chocolate or half coated in chocolate                                                              |                                                  |              | biscuit_choc_gf                                     | 17:          |              | :Gluten free version added to the updated version (however no gluten free code available at the time so the non-gluten free code was used)         |
| Biscuits sweet e.g digestive, gingernut, shortbread                                                                         | biscuit_sweet                                    |              | 17:biscuit_sweet                                    | 17:          | 0%           |                                                                                                                                                    |
| Gluten free biscuits sweet e.g digestive, gingernut, shortbread                                                             |                                                  |              | biscuit_sweet_gf                                    | 17:          |              | :Gluten free version added to the updated version                                                                                                  |
| Gluten free baguette, ciabatta, panini, sub: brown or with added fibre                                                      |                                                  |              | bread_baguette_gf_nonwhite                          | 95:          |              | :Gluten free version added to the updated version                                                                                                  |
| Gluten free baguette, ciabatta, panini, sub: not specified type so includes white, brown or with added fibre                |                                                  |              | bread_baguette_gf_unanswered                        | 95:          |              | :Gluten free version added to the updated version                                                                                                  |
| Gluten free baguette, ciabatta, panini, sub: white                                                                          |                                                  |              | bread_baguette_gf_white                             | 95:          |              | :Gluten free version added to the updated version                                                                                                  |
| Baguette, ciabatta, panini, sub: granary, brown, high fibre white, 50/50 white and wholemeal                                | bread_baguette_mixed                             |              | 95:bread_baguette_mixed                             | 95:          | 0%           |                                                                                                                                                    |
| Baguette, ciabatta, panini, sub: wheatgerm, rye, white sliced                                                               | bread_baguette_other                             |              | 95:bread_baguette_other                             | 95:          | 0%           |                                                                                                                                                    |
| Seeds for seeded bread: e.g sesame, sunflower, poppy                                                                        | bread_baguette_seeded                            |              | 3:bread_baguette_seeded                             | 3:           | 0%           |                                                                                                                                                    |
| Fat that is spread (medium amount) onto baguette: ticked butter but not specified amount of % fat                           | bread_baguette_spread_butter_dunno_med           |              | 12:bread_baguette_spread_butter_dunno_med           | 15:          | 25%:         | 125% of the weight on a bread roll; food composition as butter and spreadable butter                                                               |
| Fat that is spread (thick amount) onto baguette: ticked butter but not specified amount of % fat                            | bread_baguette_spread_butter_dunno_thick         |              | 15:bread_baguette_spread_butter_dunno_thick         | 18.75:       | 25%:         | 125% of the weight on a bread roll; food composition as butter and spreadable butter                                                               |
| Fat that is spread (thin amount) onto baguette: ticked butter but not specified amount of % fat                             | bread_baguette_spread_butter_dunno_thin          |              | 10:bread_baguette_spread_butter_dunno_thin          | 12.5:        | 25%:         | 125% of the weight on a bread roll; food composition as butter and spreadable butter                                                               |
| Fat that is spread (medium amount) onto baguette: ticked butter, normal amount of % fat                                     | bread_baguette_spread_butter_fat_med             |              | 12:bread_baguette_spread_butter_fat_med             | 15:          | 25%:         | 125% of the weight on a bread roll                                                                                                                 |
| Fat that is spread (thick amount) onto baguette: ticked butter, normal amount of % fat                                      | bread_baguette_spread_butter_fat_thick           |              | 15:bread_baguette_spread_butter_fat_thick           | 18.75:       | 25%:         | 125% of the weight on a bread roll                                                                                                                 |
| Fat that is spread (thin amount) onto baguette: ticked butter, normal amount of % fat                                       | bread_baguette_spread_butter_fat_thin            |              | 10:bread_baguette_spread_butter_fat_thin            | 12.5:        | 25%:         | 125% of the weight on a bread roll                                                                                                                 |
| Fat that is spread (medium amount) onto baguette: ticked butter, low fat                                                    | bread_baguette_spread_butter_lowfat_med          |              | 12:bread_baguette_spread_butter_lowfat_med          | 15:          | 25%:         | 125% of the weight on a bread roll                                                                                                                 |
| Fat that is spread (thick amount) onto baguette: ticked butter, low fat                                                     | bread_baguette_spread_butter_lowfat_thick        |              | 15:bread_baguette_spread_butter_lowfat_thick        | 18.75:       | 25%:         | 125% of the weight on a bread roll                                                                                                                 |
| Fat that is spread (thin amount) onto baguette: ticked butter, low fat                                                      | bread_baguette_spread_butter_lowfat_thin         |              | 10:bread_baguette_spread_butter_lowfat_thin         | 12.5:        | 25%:         | 125% of the weight on a bread roll                                                                                                                 |
| Fat that is spread (medium amount) onto baguette: ticked spreadable butter with normal amount of % fat                      | bread_baguette_spread_butter_spread_fat_med      |              | 12:bread_baguette_spread_butter_spread_fat_med      | 15:          | 25%:         | 125% of the weight on a bread roll                                                                                                                 |
| Fat that is spread (thick amount) onto baguette: ticked spreadable butter with normal amount of % fat                       | bread_baguette_spread_butter_spread_fat_thick    |              | 15:bread_baguette_spread_butter_spread_fat_thick    | 18.75:       | 25%:         | 125% of the weight on a bread roll                                                                                                                 |
| Fat that is spread (thin amount) onto baguette: ticked spreadable butter with normal amount of % fat                        | bread_baguette_spread_butter_spread_fat_thin     |              | 10:bread_baguette_spread_butter_spread_fat_thin     | 12.5:        | 25%:         | 125% of the weight on a bread roll                                                                                                                 |
| Fat that is spread (medium amount) onto baguette: ticked spreadable butter, low fat                                         | bread_baguette_spread_butter_spread_lowfat_med   |              | 12:bread_baguette_spread_butter_spread_lowfat_med   | 15:          | 25%:         | 125% of the weight on a bread roll                                                                                                                 |
| Fat that is spread (thick amount) onto baguette: ticked spreadable butter, low fat                                          | bread_baguette_spread_butter_spread_lowfat_thick |              | 15:bread_baguette_spread_butter_spread_lowfat_thick | 18.75:       | 25%:         | 125% of the weight on a bread roll                                                                                                                 |
| Fat that is spread (thin amount) onto baguette: ticked spreadable butter, low fat                                           | bread_baguette_spread_butter_spread_lowfat_thin  |              | 10:bread_baguette_spread_butter_spread_lowfat_thin  | 12.5:        | 25%:         | 125% of the weight on a bread roll                                                                                                                 |
| Fat that is spread (medium amount) onto baguette: ticked dairy spread which is also cholesterol lowering e.g Bencol Buttery | bread_baguette_spread_dairy_chol_med             |              | 10:bread_baguette_spread_dairy_chol_med             | 12.5:        | 25%:         | 125% of the weight on a bread roll                                                                                                                 |
| Fat that is spread (thick amount) onto baguette: ticked dairy spread which is also cholesterol lowering e.g Bencol Buttery  | bread_baguette_spread_dairy_chol_thick           |              | 12:bread_baguette_spread_dairy_chol_thick           | 15:          | 25%:         | 125% of the weight on a bread roll                                                                                                                 |
| Fat that is spread (thin amount) onto baguette: ticked dairy spread which is also cholesterol lowering e.g Bencol Buttery   | bread_baguette_spread_dairy_chol_thin            |              | 7:bread_baguette_spread_dairy_chol_thin             | 8.75:        | 25%:         | 125% of the weight on a bread roll                                                                                                                 |
| Fat that is spread (medium amount) onto baguette: ticked dairy spread but not specified amount of % fat                     | bread_baguette_spread_dairy_dunno_med            |              | 10:bread_baguette_spread_dairy_dunno_med            | 12.5:        | 25%:         | 125% of the weight on a bread roll; food composition as low fat and reduced fat                                                                    |
| Fat that is spread (thick amount) onto baguette: ticked dairy spread but not specified amount of % fat                      | bread_baguette_spread_dairy_dunno_thick          |              | 12:bread_baguette_spread_dairy_dunno_thick          | 15:          | 25%:         | 1                                                                                                                                                  |

|                                                                                                                                                 | McCance and Widdowson's                        | Nutrient databank + other changes |                                                     |                                                                                                                                            |
|-------------------------------------------------------------------------------------------------------------------------------------------------|------------------------------------------------|-----------------------------------|-----------------------------------------------------|--------------------------------------------------------------------------------------------------------------------------------------------|
| Variable description                                                                                                                            | Food item                                      | Portion: size:                    | Portion: size:                                      | Portion: diff%:Description of differences with previous version                                                                            |
| Fat that is spread (thick amount) onto baguette: ticked soya/vegan/dairy free margarine e.g Pure, and also cholesterol lowering                 | :bread_baguette_spread_soya_chol_thick         | 12:                               | :bread_baguette_spread_soya_chol_thick 15:          | 25%:125% of the weight on a bread roll                                                                                                     |
| Fat that is spread (thin amount) onto baguette: ticked soya/vegan/dairy free margarine e.g Pure, and also cholesterol lowering                  | :bread_baguette_spread_soya_chol_thin          | 7:                                | :bread_baguette_spread_soya_chol_thin 8.75:         | 25%:125% of the weight on a bread roll                                                                                                     |
| Fat that is spread (medium amount) onto baguette: ticked soya/vegan/dairy free margarine e.g Pure, and not specified amount of fat              | :bread_baguette_spread_soya_dunno_med          | 10:                               | :bread_baguette_spread_soya_dunno_med 12.5:         | 25%:125% of the weight on a bread roll; food composition as low fat and reduced fat                                                        |
| Fat that is spread (thick amount) onto baguette: ticked soya/vegan/dairy free margarine e.g Pure, and not specified amount of fat               | :bread_baguette_spread_soya_dunno_thick        | 12:                               | :bread_baguette_spread_soya_dunno_thick 15:         | 25%:125% of the weight on a bread roll; food composition as low fat and reduced fat                                                        |
| Fat that is spread (thin amount) onto baguette: ticked soya/vegan/dairy free margarine e.g Pure, and not specified amount of fat                | :bread_baguette_spread_soya_dunno_thin         | 7:                                | :bread_baguette_spread_soya_dunno_thin 8.75:        | 25%:125% of the weight on a bread roll; food composition as low fat and reduced fat                                                        |
| Fat that is spread (medium amount) onto baguette: ticked soya/vegan/dairy free margarine (e.g Pure), normal amount % fat                        | :bread_baguette_spread_soya_fat_med            | 10:                               | :bread_baguette_spread_soya_fat_med 12.5:           | 25%:125% of the weight on a bread roll; normal fat is taken as reduced fat (up to 62% fat)                                                 |
| Fat that is spread (thick amount) onto baguette: ticked soya/vegan/dairy free margarine (e.g Pure), normal amount % fat                         | :bread_baguette_spread_soya_fat_thick          | 12:                               | :bread_baguette_spread_soya_fat_thick 15:           | 25%:125% of the weight on a bread roll; normal fat is taken as reduced fat (up to 62% fat)                                                 |
| Fat that is spread (thin amount) onto baguette: ticked soya/vegan/dairy free margarine (e.g Pure), normal amount % fat                          | :bread_baguette_spread_soya_fat_thin           | 7:                                | :bread_baguette_spread_soya_fat_thin 8.75:          | 25%:125% of the weight on a bread roll; normal fat is taken as reduced fat (up to 62% fat)                                                 |
| Fat that is spread (medium amount) onto baguette: ticked soya/vegan/dairy free margarine (e.g Pure), low fat                                    | :bread_baguette_spread_soya_lowfat_med         | 10:                               | :bread_baguette_spread_soya_lowfat_med 12.5:        | 25%:125% of the weight on a bread roll                                                                                                     |
| Fat that is spread (thick amount) onto baguette: ticked soya/vegan/dairy free margarine (e.g Pure), low fat                                     | :bread_baguette_spread_soya_lowfat_thick       | 12:                               | :bread_baguette_spread_soya_lowfat_thick 15:        | 25%:125% of the weight on a bread roll                                                                                                     |
| Fat that is spread (thin amount) onto baguette: ticked soya/vegan/dairy free margarine (e.g Pure), low fat                                      | :bread_baguette_spread_soya_lowfat_thin        | 7:                                | :bread_baguette_spread_soya_lowfat_thin 8.75:       | 25%:125% of the weight on a bread roll                                                                                                     |
| Fat that is spread (medium amount) onto baguette: ticked soya/vegan/dairy free margarine (e.g Pure), very low fat                               | :bread_baguette_spread_soya_vlowfat_med        | 10:                               | :bread_baguette_spread_soya_vlowfat_med 12.5:       | 25%:125% of the weight on a bread roll; food composition as low fat spread                                                                 |
| Fat that is spread (thick amount) onto baguette: ticked soya/vegan/dairy free margarine (e.g Pure), very low fat                                | :bread_baguette_spread_soya_vlowfat_thick      | 12:                               | :bread_baguette_spread_soya_vlowfat_thick 15:       | 25%:125% of the weight on a bread roll; food composition as low fat spread                                                                 |
| Fat that is spread (thin amount) onto baguette: ticked soya/vegan/dairy free margarine (e.g Pure), very low fat                                 | :bread_baguette_spread_soya_vlowfat_thin       | 7:                                | :bread_baguette_spread_soya_vlowfat_thin 8.75:      | 25%:125% of the weight on a bread roll; food composition as low fat spread                                                                 |
| Baguette, ciabatta, panini, sub: not specified type so includes wholemeal, brown or white sliced bread                                          | :bread_baguette_unanswered                     | 95:                               | :bread_baguette_unanswered 95:                      | 0%:                                                                                                                                        |
| Baguette, ciabatta, panini, sub: french stick, plain ciabatta                                                                                   | :bread_baguette_white                          | 95:                               | :bread_baguette_white 95:                           | 0%:                                                                                                                                        |
| Baguette, ciabatta, panini, sub: wholemeal                                                                                                      | :bread_baguette_wholemeal                      | 95:                               | :bread_baguette_wholemeal 95:                       | 0%:                                                                                                                                        |
| Crisp bread e.g ryvita, crackers, wholemeal crackers, rice cakes                                                                                | :bread_crisp                                   | 10:                               | :bread_crisp 10:                                    | 0%:                                                                                                                                        |
| Crisp bread e.g ryvita, crackers, wholemeal crackers, rice cakes                                                                                | :bread_crisp_gf                                | 10:                               | :bread_crisp_gf 10:                                 | :Gluten free version added to the updated version (however no gluten free code available at the time so the non-gluten free code was used) |
| Fat that is spread (medium amount) onto crisp bread: ticked butter but not specified amount of % fat                                            | :bread_crisp_spread_butter_dunno_med           | 7:                                | :bread_crisp_spread_butter_dunno_med 3.9:           | -44%:40% crispbread+rice cakes (@60% of slice) + 60% cream crackers (@25% of slice); food composition as butter and spreadable butter      |
| Fat that is spread (thick amount) onto crisp bread: ticked butter but not specified amount of % fat                                             | :bread_crisp_spread_butter_dunno_thick         | 10:                               | :bread_crisp_spread_butter_dunno_thick 4.7:         | -53%:40% crispbread+rice cakes (@60% of slice) + 60% cream crackers (@25% of slice); food composition as butter and spreadable butter      |
| Fat that is spread (thin amount) onto crisp bread: ticked butter but not specified amount of % fat                                              | :bread_crisp_spread_butter_dunno_thin          | 5:                                | :bread_crisp_spread_butter_dunno_thin 2.7:          | -46%:40% crispbread+rice cakes (@60% of slice) + 60% cream crackers (@25% of slice); food composition as butter and spreadable butter      |
| Fat that is spread (medium amount) onto crisp bread: ticked butter, normal amount of % fat                                                      | :bread_crisp_spread_butter_fat_med             | 7:                                | :bread_crisp_spread_butter_fat_med 3.9:             | -44%:40% crispbread+rice cakes (@62% of slice) + 62% cream crackers (@25% of slice)                                                        |
| Fat that is spread (thick amount) onto crisp bread: ticked butter, normal amount of % fat                                                       | :bread_crisp_spread_butter_fat_thick           | 10:                               | :bread_crisp_spread_butter_fat_thick 4.7:           | -53%:40% crispbread+rice cakes (@62% of slice) + 62% cream crackers (@25% of slice)                                                        |
| Fat that is spread (thin amount) onto crisp bread: ticked butter, normal amount of % fat                                                        | :bread_crisp_spread_butter_fat_thin            | 5:                                | :bread_crisp_spread_butter_fat_thin 2.7:            | -46%:40% crispbread+rice cakes (@62% of slice) + 62% cream crackers (@25% of slice)                                                        |
| Fat that is spread (medium amount) onto crisp bread: ticked butter, low fat                                                                     | :bread_crisp_spread_butter_lowfat_med          | 7:                                | :bread_crisp_spread_butter_lowfat_med 3.9:          | -44%:40% crispbread+rice cakes (@60% of slice) + 60% cream crackers (@25% of slice)                                                        |
| Fat that is spread (thick amount) onto crisp bread: ticked butter, low fat                                                                      | :bread_crisp_spread_butter_lowfat_thick        | 10:                               | :bread_crisp_spread_butter_lowfat_thick 4.7:        | -53%:40% crispbread+rice cakes (@60% of slice) + 60% cream crackers (@25% of slice)                                                        |
| Fat that is spread (thin amount) onto crisp bread: ticked butter, low fat                                                                       | :bread_crisp_spread_butter_lowfat_thin         | 5:                                | :bread_crisp_spread_butter_lowfat_thin 2.7:         | -46%:40% crispbread+rice cakes (@60% of slice) + 60% cream crackers (@25% of slice)                                                        |
| Fat that is spread (medium amount) onto crisp bread: ticked spreadable butter with normal amount of % fat                                       | :bread_crisp_spread_butter_spread_fat_med      | 7:                                | :bread_crisp_spread_butter_spread_fat_med 3.9:      | -44%:40% crispbread+rice cakes (@62% of slice) + 62% cream crackers (@25% of slice)                                                        |
| Fat that is spread (thick amount) onto crisp bread: ticked spreadable butter with normal amount of % fat                                        | :bread_crisp_spread_butter_spread_fat_thick    | 10:                               | :bread_crisp_spread_butter_spread_fat_thick 4.7:    | -53%:40% crispbread+rice cakes (@62% of slice) + 62% cream crackers (@25% of slice)                                                        |
| Fat that is spread (thin amount) onto crisp bread: ticked spreadable butter with normal amount of % fat                                         | :bread_crisp_spread_butter_spread_fat_thin     | 5:                                | :bread_crisp_spread_butter_spread_fat_thin 2.7:     | -46%:40% crispbread+rice cakes (@62% of slice) + 62% cream crackers (@25% of slice)                                                        |
| Fat that is spread (medium amount) onto crisp bread: ticked spreadable butter, low fat                                                          | :bread_crisp_spread_butter_spread_lowfat_med   | 7:                                | :bread_crisp_spread_butter_spread_lowfat_med 3.9:   | -44%:40% crispbread+rice cakes (@60% of slice) + 60% cream crackers (@25% of slice)                                                        |
| Fat that is spread (thick amount) onto crisp bread: ticked spreadable butter, low fat                                                           | :bread_crisp_spread_butter_spread_lowfat_thick | 10:                               | :bread_crisp_spread_butter_spread_lowfat_thick 4.7: | -53%:40% crispbread+rice cakes (@60% of slice) + 60% cream crackers (@25% of slice)                                                        |
| Fat that is spread (thin amount) onto crisp bread: ticked spreadable butter, low fat                                                            | :bread_crisp_spread_butter_spread_lowfat_thin  | 5:                                | :bread_crisp_spread_butter_spread_lowfat_thin 2.7:  | -46%:40% crispbread+rice cakes (@60% of slice) + 60% cream crackers (@25% of slice)                                                        |
| Fat that is spread (medium amount) onto crisp bread: ticked dairy spread which is also cholesterol lowering e.g Benecol Buttery                 | :bread_crisp_spread_dairy_chol_med             | 5:                                | :bread_crisp_spread_dairy_chol_med 2.7:             | -46%:40% crispbread+rice cakes (@60% of slice) + 60% cream crackers (@25% of slice)                                                        |
| Fat that is spread (thick amount) onto crisp bread: ticked dairy spread which is also cholesterol lowering e.g Benecol Buttery                  | :bread_crisp_spread_dairy_chol_thick           | 7:                                | :bread_crisp_spread_dairy_chol_thick 3.9:           | -44%:40% crispbread+rice cakes (@60% of slice) + 60% cream crackers (@25% of slice)                                                        |
| Fat that is spread (thin amount) onto crisp bread: ticked dairy spread which is also cholesterol lowering e.g Benecol Buttery                   | :bread_crisp_spread_dairy_chol_thin            | 3:                                | :bread_crisp_spread_dairy_chol_thin 2:              | -33%:40% crispbread+rice cakes (@60% of slice) + 60% cream crackers (@25% of slice)                                                        |
| Fat that is spread (medium amount) onto crisp bread: ticked dairy spread but not specified amount of % fat                                      | :bread_crisp_spread_dairy_dunno_med            | 5:                                | :bread_crisp_spread_dairy_dunno_med 2.7:            | -46%:40% crispbread+rice cakes (@60% of slice) + 60% cream crackers (@25% of slice); food composition as low fat and reduced fat           |
| Fat that is spread (thick amount) onto crisp bread: ticked dairy spread but not specified amount of % fat                                       | :bread_crisp_spread_dairy_dunno_thick          | 7:                                | :bread_crisp_spread_dairy_dunno_thick 3.9:          | -44%:40% crispbread+rice cakes (@60% of slice) + 60% cream crackers (@25% of slice); food composition as low fat and reduced fat           |
| Fat that is spread (thin amount) onto crisp bread: ticked dairy spread but not specified amount of % fat                                        | :bread_crisp_spread_dairy_dunno_thin           | 3:                                | :bread_crisp_spread_dairy_dunno_thin 2:             | -33%:40% crispbread+rice cakes (@60% of slice) + 60% cream crackers (@25% of slice); food composition as low fat and reduced fat           |
| Fat that is spread (medium amount) onto crisp bread: ticked dairy spread with normal amount of % fat                                            | :bread_crisp_spread_dairy_fat_med              | 5:                                | :bread_crisp_spread_dairy_fat_med 2.7:              | -46%:40% crispbread+rice cakes (@62% of slice) + 62% cream crackers (@25% of slice); normal fat is taken as reduced fat (up to 62% fat)    |
| Fat that is spread (thick amount) onto crisp bread: ticked dairy spread with normal amount of % fat                                             | :bread_crisp_spread_dairy_fat_thick            | 7:                                | :bread_crisp_spread_dairy_fat_thick 3.9:            | -44%:40% crispbread+rice cakes (@62% of slice) + 62% cream crackers (@25% of slice); normal fat is taken as reduced fat (up to 62% fat)    |
| Fat that is spread (thin amount) onto crisp bread: ticked dairy spread with normal amount of % fat                                              | :bread_crisp_spread_dairy_fat_thin             | 3:                                | :bread_crisp_spread_dairy_fat_thin 2:               | -33%:40% crispbread+rice cakes (@62% of slice) + 62% cream crackers (@25% of slice); normal fat is taken as reduced fat (up to 62% fat)    |
| Fat that is spread (medium amount) onto crisp bread: ticked dairy spread, low fat                                                               | :bread_crisp_spread_dairy_lowfat_med           | 5:                                | :bread_crisp_spread_dairy_lowfat_med 2.7:           | -46%:40% crispbread+rice cakes (@60% of slice) + 60% cream crackers (@25% of slice)                                                        |
| Fat that is spread (thick amount) onto crisp bread: ticked dairy spread, low fat                                                                | :bread_crisp_spread_dairy_lowfat_thick         | 7:                                | :bread_crisp_spread_dairy_lowfat_thick 3.9:         | -44%:40% crispbread+rice cakes (@60% of slice) + 60% cream crackers (@25% of slice)                                                        |
| Fat that is spread (thin amount) onto crisp bread: ticked dairy spread, low fat                                                                 | :bread_crisp_spread_dairy_lowfat_thin          | 3:                                | :bread_crisp_spread_dairy_lowfat_thin 2:            | -33%:40% crispbread+rice cakes (@60% of slice) + 60% cream crackers (@25% of slice)                                                        |
| Fat that is spread (medium amount) onto crisp bread: ticked dairy spread, very low fat                                                          | :bread_crisp_spread_dairy_vlowfat_med          | 5:                                | :bread_crisp_spread_dairy_vlowfat_med 2.7:          | -46%:40% crispbread+rice cakes (@60% of slice) + 60% cream crackers (@25% of slice); food composition as low fat spread                    |
| Fat that is spread (thick amount) onto crisp bread: ticked dairy spread, very low fat                                                           | :bread_crisp_spread_dairy_vlowfat_thick        | 7:                                | :bread_crisp_spread_dairy_vlowfat_thick 3.9:        | -44%:40% crispbread+rice cakes (@60% of slice) + 60% cream crackers (@25% of slice); food composition as low fat spread                    |
| Fat that is spread (thin amount) onto crisp bread: ticked dairy spread, very low fat                                                            | :bread_crisp_spread_dairy_vlowfat_thin         | 3:                                | :bread_crisp_spread_dairy_vlowfat_thin 2:           | -33%:40% crispbread+rice cakes (@60% of slice) + 60% cream crackers (@25% of slice); food composition as low fat spread                    |
| Fat that is spread (medium amount) onto crisp bread: not specified type of spread but ticked cholesterol lowering e.g Benecol, Flora pro active | :bread_crisp_spread_dunno_chol_med             | 5:                                | :bread_crisp_spread_dunno_chol_med 2.7:             | -46%:40% crispbread+rice cakes (@60% of slice) + 60% cream crackers (@25% of slice)                                                        |
| Fat that is spread (thick amount) onto crisp bread: not specified type of spread but ticked cholesterol lowering e.g Benecol, Flora pro active  | :bread_crisp_spread_dunno_chol_thick           | 7:                                | :bread_crisp_spread_dunno_chol_thick 3.9:           | -44%:40% crispbread+rice cakes (@60% of slice) + 60% cream crackers (@25% of slice)                                                        |
| Fat that is spread (thin amount) onto crisp bread: not specified type of spread but ticked cholesterol lowering e.g Benecol, Flora pro active   | :bread_crisp_spread_dunno_chol_thin            | 3:                                | :bread_crisp_spread_dunno_chol_thin 2:              | -33%:40% crispbread+rice cakes (@60% of slice) + 60% cream crackers (@25% of slice)                                                        |
| Fat that is spread (medium amount) onto crisp bread: not specified type of spread or amount of % fat                                            | :bread_crisp_spread_dunno_dunno_med            | 5:                                | :bread_crisp_spread_dunno_dunno_med 2.7:            | -46%:40% crispbread+rice cakes (@60% of slice) + 60% cream crackers (@25% of slice)                                                        |
| Fat that is spread (thick amount) onto crisp bread: not specified type of spread or amount of % fat                                             | :bread_crisp_spread_dunno_dunno_thick          | 7:                                | :bread_crisp_spread_dunno_dunno_thick 3.9:          | -44%:40% crispbread+rice cakes (@60% of slice) + 60% cream crackers (@25% of slice)                                                        |
| Fat that is spread (thin amount) onto crisp bread: not specified type of spread or amount of % fat                                              | :bread_crisp_spread_dunno_dunno_thin           | 3:                                | :bread_crisp_spread_dunno_dunno_thin 2:             | -33%:40% crispbread+rice cakes (@60% of slice) + 60% cream crackers (@25% of slice)                                                        |
| Fat that is spread (medium amount) onto crisp bread: not specified type of spread but ticked normal amount % fat                                | :bread_crisp_spread_dunno_fat_med              | 5:                                | :bread_crisp_spread_dunno_fat_med 2.7:              | -46%:40% crispbread+rice cakes (@62% of slice) + 62% cream crackers (@25% of slice); normal fat is taken as reduced fat (up to 62% fat)    |
| Fat that is spread (thick amount) onto crisp bread: not specified type of spread but ticked normal amount % fat                                 | :bread_crisp_spread_dunno_fat_thick            | 7:                                | :bread_crisp_spread_dunno_fat_thick 3.9:            | -44%:40% crispbread+rice cakes (@62% of slice) + 62% cream crackers (@25% of slice); normal fat is taken as reduced fat (up to 62% fat)    |
| Fat that is spread (thin amount) onto crisp bread: not specified type of spread but ticked normal amount % fat                                  | :bread_crisp_spread_dunno_fat_thin             | 3:                                | :bread_crisp_spread_dunno_fat_thin 2:               | -33%:40% crispbread+rice cakes (@62% of slice) + 62% cream crackers (@25% of slice); normal fat is taken as reduced fat (up to 62% fat)    |
| Fat that is spread (medium amount) onto crisp bread: not specified type of spread but ticked low fat                                            | :bread_crisp_spread_dunno_lowfat_med           | 5:                                | :bread_crisp_spread_dunno_lowfat_med 2.7:           | -46%:40% crispbread+rice cakes (@60% of slice) + 60% cream crackers (@25% of slice)                                                        |
| Fat that is spread (thick amount) onto crisp bread: not specified type of spread but ticked low fat                                             | :bread_crisp_spread_dunno_lowfat_thick         | 7:                                | :bread_crisp_spread_dunno_lowfat_thick 3.9:         | -44%:40% crispbread+rice cakes (@60% of slice) + 60% cream crackers (@25% of slice)                                                        |
| Fat that is spread (thin amount) onto crisp bread: not specified type of spread but ticked low fat                                              | :bread_crisp_spread_dunno_lowfat_thin          | 3:                                | :bread_crisp_spread_dunno_lowfat_thin 2:            | -33%:40% crispbread+rice cakes (@60% of slice) + 60% cream crackers (@25% of slice)                                                        |
| Fat that is spread (medium amount) onto crisp bread: not specified type of spread but ticked very low fat                                       | :bread_crisp_spread_dunno_vlowfat_med          | 5:                                | :bread_crisp_spread_dunno_vlowfat_med 2.7:          | -46%:40% crispbread+rice cakes (@60% of slice) + 60% cream crackers (@25% of slice); food composition as low fat spread                    |
| Fat that is spread (thick amount) onto crisp bread: not specified type of spread but ticked very low fat                                        | :bread_crisp_spread_dunno_vlowfat_thick        | 7:                                | :bread_crisp_spread_dunno_vlowfat_thick 3.9:        | -44%:40% crispbread+rice cakes (@60% of slice) + 60% cream crackers (@25% of slice); food composition as low fat spread                    |
| Fat that is spread (thin amount) onto crisp bread: not specified type of spread but ticked very low fat                                         | :bread_crisp_spread_dunno_vlowfat_thin         | 3:                                | :bread_crisp_spread_dunno_vlowfat_thin 2:           | -33%:40% crispbread+rice cakes (@60% of slice) + 60% cream crackers (@25% of slice); food composition as low fat spread                    |
| Fat that is spread (medium amount) onto crisp bread: ticked hard margarine (hard block margarine in wrapper)                                    | :bread_crisp_spread_hardmarg_med               | 7:                                | :bread_crisp_spread_hardmarg_med 3.9:               | -44%:40% crispbread+rice cakes (@60% of slice) + 60% cream crackers (@25% of slice); spread weight as butter                               |
| Fat that is spread (thick amount) onto crisp bread: ticked hard margarine (hard block margarine in wrapper)                                     | :bread_crisp_spread_hardmarg_thick             | 10:                               | :bread_crisp_spread_hardmarg_thick 4.7:             | -53%:40% crispbread+rice cakes (@60% of slice) + 60% cream crackers (@25% of slice); spread weight as butter                               |
| Fat that is spread (thin amount) onto crisp bread: ticked hard margarine (hard block margarine in wrapper)                                      | :bread_crisp_spread_hardmarg_thin              | 5:                                | :bread_crisp_spread_hardmarg_thin 2.7:              | -46%:40% crispbread+rice cakes (@60% of slice) + 60% cream crackers (@25% of slice); spread weight as butter                               |
| Fat that is spread (medium amount) onto crisp bread: ticked cholesterol lowering olive spread e.g Benecol/Flora pro active olive spread         | :bread_crisp_spread_olive_chol_med             | 5:                                | :bread_crisp_spread_olive_chol_med 2.7:             | -46%:40% crispbread+rice cakes (@60% of slice) + 60% cream crackers (@25% of slice)                                                        |
| Fat that is spread (thick amount) onto crisp bread: ticked cholesterol lowering olive spread e.g Benecol/Flora pro active olive spread          | :bread_crisp_spread_olive_chol_thick           | 7:                                | :bread_crisp_spread_olive_chol_thick 3.9:           | -44%:40% crispbread+rice cakes (@60% of slice) + 60% cream crackers (@25% of slice)                                                        |
| Fat that is spread (thin amount) onto crisp bread: ticked cholesterol lowering olive spread e.g Benecol/Flora pro active olive spread           | :bread_crisp_spread_olive_chol_thin            | 3:                                | :bread_crisp_spread_olive_chol_thin 2:              | -33%:40% crispbread+rice cakes (@60% of slice) + 60% cream crackers (@25% of slice)                                                        |
| Fat that is spread (medium amount) onto crisp bread: ticked olive spread but not specified amount of fat                                        | :bread_crisp_spread_olive_dunno_med            | 5:                                | :bread_crisp_spread_olive_dunno_med 2.7:            | -46%:40% crispbread+rice cakes (@60% of slice) + 60% cream crackers (@25% of slice)                                                        |
| Fat that is spread (thick amount) onto crisp bread: ticked olive spread but not specified amount of fat                                         | :bread_crisp_spread_olive_dunno_thick          | 7:                                | :bread_crisp_spread_olive_dunno_thick 3.9:          | -44%:40% crispbread+rice cakes (@60% of slice) + 60% cream crackers (@25% of slice)                                                        |
| Fat that is spread (thin amount) onto crisp bread: ticked olive spread but not specified amount of fat                                          | :bread_crisp_spread_olive_dunno_thin           | 3:                                | :bread_crisp_spread_olive_dunno_thin 2:             | -33%:40% crispbread+rice cakes (@60% of slice) + 60% cream crackers (@25% of slice)                                                        |
| Fat that is spread (medium amount) onto crisp bread: ticked olive spread with normal amount of % fat                                            | :bread_crisp_spread_olive_fat_med              | 5:                                | :bread_crisp_spread_olive_fat_med 2.7:              | -46%:40% crispbread+rice cakes (@62% of slice) + 62% cream crackers (@25% of slice); normal fat is taken as reduced fat (up to 62% fat)    |
| Fat that is spread (thick amount) onto crisp bread: ticked olive spread with normal amount of % fat                                             | :bread_crisp_spread_olive_fat_thick            | 7:                                | :bread_crisp_spread_olive_fat_thick 3.9:            | -44%:40% crispbread+rice cakes (@62% of slice) + 62% cream crackers (@25% of slice); normal fat is taken as reduced fat (up to 62% fat)    |
| Fat that is spread (thin amount) onto crisp bread: ticked olive spread with normal amount of % fat                                              | :bread_crisp_spread_olive_fat_thin             | 3:                                | :bread_crisp_spread_olive_fat_thin 2:               | -33%:40% crispbread+rice cakes (@62% of slice) + 62% cream crackers (@25% of slice); normal fat is taken as reduced fat (up to 62% fat)    |
| Fat that is spread (medium amount) onto crisp bread: ticked olive spread, low fat                                                               | :bread_crisp_spread_olive_lowfat_med           | 5:                                | :bread_crisp_spread_olive_lowfat_med 2.7:           | -46%:40% crispbread+rice cakes (@60% of slice) + 60% cream crackers (@25% of slice)                                                        |
| Fat that is spread (thick amount) onto crisp bread: ticked olive spread, low fat                                                                | :bread_crisp_spread_olive_lowfat_thick         | 7:                                | :bread_crisp_spread_olive_lowfat_thick 3.9:         | -44%:40% crispbread+rice cakes (@60% of slice) + 60% cream crackers (@25% of slice)                                                        |
| Fat that is spread (thin amount) onto crisp bread: ticked olive spread, low fat                                                                 | :bread_crisp_spread_olive_lowfat_thin          | 3:                                | :bread_crisp_spread_olive_lowfat_thin 2:            | -33%:40% crispbread+rice cakes (@60% of slice) + 60% cream crackers (@25% of slice)                                                        |
| Fat that is spread (medium amount) onto crisp bread: ticked olive spread, very low fat                                                          | :bread_crisp_spread_olive_vlowfat_med          | 5:                                | :bread_crisp_spread_olive_vlowfat_med 2.7:          | -46%:40% crispbread+rice cakes (@60% of slice) + 60% cream crackers (@25% of slice); food composition as low fat spread                    |
| Fat that is spread (thick amount) onto crisp bread: ticked olive spread, very low fat                                                           | :bread_crisp_spread_olive_vlowfat_thick        | 7:                                | :bread_crisp_spread_olive_vlowfat_thick 3.9:        | -44%:40% crispbread+rice cakes (@60% of slice) + 60% cream crackers (@25% of slice); food composition as low fat spread                    |
| Fat that is spread (thin amount) onto crisp bread: ticked olive spread, very low fat                                                            | :bread_crisp_spread_olive_vlowfat_thin         | 3:                                | :bread_crisp_spread_olive_vlowfat_thin 2:           | -33%:40% crispbread+rice cakes (@60% of slice) + 60% cream crackers (@25% of slice); food composition as low fat spread                    |
| Fat that is spread (medium amount) onto crisp bread: ticked other spread e.g ghee                                                               | :bread_crisp_spread_other_med                  | 5:                                | :bread_crisp_spread_other_med 2.7:                  | -46%:40% crispbread+rice cakes (@60% of slice) + 60% cream crackers (@25% of slice)                                                        |
| Fat that is spread (thick amount) onto crisp bread: ticked other spread e.g ghee                                                                | :bread_crisp_spread_other_thick                | 7:                                | :bread_crisp_spread_other_thick 3.9:                | -44%:40% crispbread+rice cakes (@60% of slice) + 60% cream crackers (@25% of slice)                                                        |
| Fat that is spread (thin amount) onto crisp bread: ticked other spread e.g ghee                                                                 | :bread_crisp_spread_other_thin                 | 3:                                | :bread_crisp_spread_other_thin 2:                   | -33%:40% crispbread+rice cakes (@60% of slice) + 60% cream crackers (@25% of slice)                                                        |
| Fat that is spread (medium amount) onto crisp bread: ticked polyunsaturated margarine (e.g Flora) and also cholesterol lowering                 | :bread_crisp_spread_polymarg_chol_med          | 5:                                | :bread_crisp_spread_polymarg_chol_med 2.7:          | -46%:40% crispbread+rice cakes (@60% of slice) + 60% cream crackers (@25% of slice)                                                        |
| Fat that is spread (thick amount) onto crisp bread: ticked polyunsaturated margarine (e.g Flora) and also cholesterol lowering                  | :bread_crisp_spread_polymarg_chol_thick        | 7:                                | :bread_crisp_spread_polymarg_chol_thick 3.9:        | -44%:40% crispbread+rice cakes (@60% of slice) + 60% cream crackers (@25% of slice)                                                        |
| Fat that is spread (thin amount) onto crisp bread: ticked polyunsaturated margarine (e.g Flora) and also cholesterol lowering                   | :bread_crisp_spread_polymarg_chol_thin         | 3:                                | :bread_crisp_spread_polymarg_chol_thin 2:           | -33%:40% crispbread+rice cakes (@60% of slice) + 60% cream crackers (@25% of slice)                                                        |
| Fat that is spread (medium amount) onto crisp bread: ticked polyunsaturated margarine (e.g Flora) but not specified amount of fat               | :bread_crisp_spread_polymarg_dunno_med         | 5:                                | :bread_crisp_spread_polymarg_dunno_med 2.7:         | -46%:40% crispbread+rice cakes (@60% of slice) + 60% cream crackers (@25% of slice)                                                        |
| Fat that is spread (thick amount) onto crisp bread: ticked polyunsaturated margarine (e.g Flora) but not specified amount of fat                | :bread_crisp_spread_polymarg_dunno_thick       | 7:                                | :bread_crisp_spread_polymarg_dunno_thick 3.9:       | -44%:40% crispbread+rice cakes (@60% of slice) + 60% cream crackers (@25% of slice)                                                        |
| Fat that is spread (thin amount) onto crisp bread: ticked polyunsaturated margarine (e.g Flora) but not specified amount of fat                 | :bread_crisp_spread_polymarg_dunno_thin        | 3:                                | :bread_crisp_spread_polymarg_dunno_thin 2:          | -33%:40% crispbread+rice cakes (@60% of slice) + 60% cream crackers (@25% of slice)                                                        |
| Fat that is spread (medium amount) onto crisp bread: ticked polyunsaturated margarine (e.g Flora), normal amount of % fat                       | :bread_crisp_spread_polymarg_fat_med           | 5:                                | :bread_crisp_spread_polymarg_fat_med 2.7:           | -46%:40% crispbread+rice cakes (@62% of slice) + 62% cream crackers (@25% of slice); normal fat is taken as reduced fat (up to 62% fat)    |
| Fat that is spread (thick amount) onto crisp bread: ticked polyunsaturated margarine (e.g Flora), normal amount of % fat                        | :bread_crisp_spread_polymarg_fat_thick         | 7:                                | :bread_crisp_spread_polymarg_fat_thick 3.9:         | -44%:40% crispbread+rice cakes (@62% of slice) + 62% cream crackers (@25% of slice); normal fat is taken as reduced fat (up to 62% fat)    |
| Fat that is spread (thin amount) onto crisp bread: ticked polyunsaturated margarine (e.g Flora), normal amount of % fat                         | :bread_crisp_spread_polymarg_fat_thin          | 3:                                | :bread_crisp_spread_polymarg_fat_thin 2:            | -33%:40% crispbread+rice cakes (@62% of slice) + 62% cream crackers (@25% of slice); normal fat is taken as reduced fat (up to 62% fat)    |
| Fat that is spread (medium amount) onto crisp bread: ticked polyunsaturated margarine (e.g Flora), low fat                                      | :bread_crisp_spread_polymarg_lowfat_med        | 5:                                | :bread_crisp_spread_polymarg_lowfat_med 2.7:        | -46%:40% crispbread+rice cakes (@60% of slice) + 60% cream crackers (@25% of slice)                                                        |
| Fat that is spread (thick amount) onto crisp bread: ticked polyunsaturated margarine (e.g Flora), low fat                                       | :bread_crisp_spread_polymarg_lowfat_thick      | 7:                                | :bread_crisp_spread_polymarg_lowfat_thick 3.9:      | -44%:40% crispbread+rice cakes (@60% of slice) + 60% cream crackers (@25% of slice)                                                        |
| Fat that is spread (thin amount) onto crisp bread: ticked polyunsaturated margarine (e.g Flora), low fat                                        | :bread_crisp_spread_polymarg_lowfat_thin       | 3:                                | :bread_crisp_spread_polymarg_lowfat_thin 2:         | -33%:40% crispbread+rice cakes (@60% of slice) + 60% cream crackers (@25% of slice)                                                        |
| Fat that is spread (medium amount) onto crisp bread: ticked polyunsaturated margarine (e.g Flora), very low fat                                 | :bread_crisp_spread_polymarg_vlowfat_med       | 5:                                | :bread_crisp_spread_polymarg_vlowfat_med 2.7:       | -46%:40% crispbread+rice cakes (@60% of slice) + 60% cream crackers (@25% of slice); food composition as low fat spread                    |
| Fat that is spread (thick amount) onto crisp bread: ticked polyunsaturated margarine (e.g Flora), very low fat                                  | :bread_crisp_spread_polymarg_vlowfat_thick     | 7:                                | :bread_crisp_spread_polymarg_vlowfat_thick 3.9:     | -44%:40% crispbread+rice cakes (@60% of slice) + 60% cream crackers (@25% of slice); food composition as low fat spread                    |
| Fat that is spread (thin amount) onto crisp bread: ticked polyunsaturated margarine (e.g Flora), very low fat                                   | :bread_crisp_spread_polymarg_vlowfat_thin      | 3:                                | :bread_crisp_spread_polymarg_vlowfat_thin 2:        | -33%:40% crispbread+rice cakes (@60% of slice) + 60% cream crackers (@25% of slice); food composition as low fat spread                    |
| Fat that is spread (medium amount) onto crisp bread: ticked soya/vegan/dairy free margarine e.g Pure, and also cholesterol lowering             | :bread_crisp_spread_soya_chol_med              | 5:                                | :bread_crisp_spread_soya_chol_med 2.7:              | -46%:40% crispbread+rice cakes (@60% of slice) + 60% cream crackers (@25% of slice)                                                        |
| Fat that is spread (thick amount) onto crisp bread: ticked soya/vegan/dairy free margarine e.g Pure, and also cholesterol lowering              | :bread_crisp_spread_soya_chol_thick            | 7:                                | :bread_crisp_spread_soya_chol_thick 3.9:            | -44%:40% crispbread+rice cakes (@60% of slice) + 60% cream crackers (@25% of slice)                                                        |
| Fat that is spread (thin amount) onto crisp bread: ticked soya/vegan/dairy free margarine e.g Pure, and also cholesterol lowering               | :bread_crisp_spread_soya_chol_thin             | 3:                                | :bread_crisp_spread_soya_chol_thin 2:               | -33%:40% crispbread+rice cakes (@60% of slice) + 60% cream crackers (@25% of slice)                                                        |
| Fat that is spread (medium amount) onto crisp bread: ticked soya/vegan/dairy free margarine e.g Pure, and not specified amount of fat           | :bread_crisp_spread_soya_dunno_med             | 5:                                | :bread_crisp_spread_soya_dunno_med 2.7:             | -46%:40% crispbread+rice cakes (@60% of slice) + 60% cream crackers (@25% of slice)                                                        |
| Fat that is spread (thick amount) onto crisp bread: ticked soya/vegan/dairy free margarine e.g Pure, and not specified amount of fat            | :bread_crisp_spread_soya_dunno_thick           | 7:                                | :bread_crisp_spread_soya_dunno_thick 3.9:           | -44%:40% crispbread+rice cakes (@60% of slice) + 60% cream crackers (@25% of slice)                                                        |
| Fat that is spread (thin amount) onto crisp bread: ticked soya/vegan/dairy free margarine e.g Pure, and not specified amount of fat             | :bread_crisp_spread_soya_dunno_thin            | 3:                                | :bread_crisp_spread_soya_dunno_thin 2:              | -33%:40% crispbread+rice cakes (@60% of slice) + 60% cream crackers (@25% of slice)                                                        |
| Fat that is spread (medium amount) onto crisp bread: ticked soya/vegan/dairy free margarine (e.g Pure), normal amount % fat                     | :bread_crisp_spread_soya_fat_med               | 5:                                | :bread_cris                                         |                                                                                                                                            |

|                                                                                                                               | McCance and Widdowson's                           | Portion: | Nutrient databank + other changes                 | Portion: | Portion:                                                                                                                |
|-------------------------------------------------------------------------------------------------------------------------------|---------------------------------------------------|----------|---------------------------------------------------|----------|-------------------------------------------------------------------------------------------------------------------------|
| Variable description                                                                                                          | Food item                                         | size:    | Food item                                         | size:    | diff%:Description of differences with previous version                                                                  |
| Fat that is spread (medium amount) onto crisp bread: ticked soya/vegan/dairy free margarine (e.g Pure), low fat               | bread_crisp_spread_soya_lowfat_med                | 5:       | bread_crisp_spread_soya_lowfat_med                | 2.7:     | -46%:40% crispbread+rice cakes (@60% of slice) + 60% cream crackers (@25% of slice)                                     |
| Fat that is spread (thick amount) onto crisp bread: ticked soya/vegan/dairy free margarine (e.g Pure), low fat                | bread_crisp_spread_soya_lowfat_thick              | 7:       | bread_crisp_spread_soya_lowfat_thick              | 3.9:     | -44%:40% crispbread+rice cakes (@60% of slice) + 60% cream crackers (@25% of slice)                                     |
| Fat that is spread (thin amount) onto crisp bread: ticked soya/vegan/dairy free margarine (e.g Pure), low fat                 | bread_crisp_spread_soya_lowfat_thin               | 3:       | bread_crisp_spread_soya_lowfat_thin               | 2:       | -33%:40% crispbread+rice cakes (@60% of slice) + 60% cream crackers (@25% of slice)                                     |
| Fat that is spread (medium amount) onto crisp bread: ticked soya/vegan/dairy free margarine (e.g Pure), very low fat          | bread_crisp_spread_soya_vlowfat_med               | 5:       | bread_crisp_spread_soya_vlowfat_med               | 2.7:     | -46%:40% crispbread+rice cakes (@60% of slice) + 60% cream crackers (@25% of slice); food composition as low fat spread |
| Fat that is spread (thick amount) onto crisp bread: ticked soya/vegan/dairy free margarine (e.g Pure), very low fat           | bread_crisp_spread_soya_vlowfat_thick             | 7:       | bread_crisp_spread_soya_vlowfat_thick             | 3.9:     | -44%:40% crispbread+rice cakes (@60% of slice) + 60% cream crackers (@25% of slice); food composition as low fat spread |
| Fat that is spread (thin amount) onto crisp bread: ticked soya/vegan/dairy free margarine (e.g Pure), very low fat            | bread_crisp_spread_soya_vlowfat_thin              | 3:       | bread_crisp_spread_soya_vlowfat_thin              | 2:       | -33%:40% crispbread+rice cakes (@60% of slice) + 60% cream crackers (@25% of slice); food composition as low fat spread |
| Garlic bread                                                                                                                  | bread_garlic                                      | 20:      | bread_garlic                                      | 20:      | 0%:                                                                                                                     |
| Gluten free large bap, stotty, pitta bread: brown or with added fibre                                                         |                                                   |          | bread_large_bap_gf_nonwhite                       | 90:      | -:Gluten free version added to the updated version                                                                      |
| Gluten free large bap, stotty, pitta bread: not specified type so includes white, brown or with added fibre                   |                                                   |          | bread_large_bap_gf_unanswered                     | 90:      | -:Gluten free version added to the updated version                                                                      |
| Gluten free large bap, stotty, pitta bread: white                                                                             |                                                   |          | bread_large_bap_gf_white                          | 90:      | -:Gluten free version added to the updated version                                                                      |
| Large bap, stotty, pitta bread: brown, granary, wheatgerm, 50/50, soft or crusty                                              | bread_large_bap_mixed                             | 90:      | bread_large_bap_mixed                             | 90:      | 0%:                                                                                                                     |
| Large bap, stotty, pitta bread: wheatgerm, rye, white                                                                         | bread_large_bap_other                             | 90:      | bread_large_bap_other                             | 90:      | 0%:                                                                                                                     |
| Seeds for seeded bread: e.g sesame, sunflower, poppy                                                                          | bread_large_bap_seeded                            | 3:       | bread_large_bap_seeded                            | 3:       | 0%:                                                                                                                     |
| Fat that is spread (medium amount) onto large bap: ticked butter but not specified amount of % fat                            | bread_large_bap_spread_butter_dunno_med           | 12:      | bread_large_bap_spread_butter_dunno_med           | 15:      | 25%:125% of the weight on a bread roll; food composition as butter and spreadable butter                                |
| Fat that is spread (thick amount) onto large bap: ticked butter but not specified amount of % fat                             | bread_large_bap_spread_butter_dunno_thick         | 15:      | bread_large_bap_spread_butter_dunno_thick         | 18.75:   | 25%:125% of the weight on a bread roll; food composition as butter and spreadable butter                                |
| Fat that is spread (thin amount) onto large bap: ticked butter but not specified amount of % fat                              | bread_large_bap_spread_butter_dunno_thin          | 10:      | bread_large_bap_spread_butter_dunno_thin          | 12.5:    | 25%:125% of the weight on a bread roll; food composition as butter and spreadable butter                                |
| Fat that is spread (medium amount) onto large bap: ticked butter, normal amount of % fat                                      | bread_large_bap_spread_butter_fat_med             | 12:      | bread_large_bap_spread_butter_fat_med             | 15:      | 25%:125% of the weight on a bread roll                                                                                  |
| Fat that is spread (thick amount) onto large bap: ticked butter, normal amount of % fat                                       | bread_large_bap_spread_butter_fat_thick           | 15:      | bread_large_bap_spread_butter_fat_thick           | 18.75:   | 25%:125% of the weight on a bread roll                                                                                  |
| Fat that is spread (thin amount) onto large bap: ticked butter, normal amount of % fat                                        | bread_large_bap_spread_butter_fat_thin            | 10:      | bread_large_bap_spread_butter_fat_thin            | 12.5:    | 25%:125% of the weight on a bread roll                                                                                  |
| Fat that is spread (medium amount) onto large bap: ticked butter, low fat                                                     | bread_large_bap_spread_butter_lowfat_med          | 12:      | bread_large_bap_spread_butter_lowfat_med          | 15:      | 25%:125% of the weight on a bread roll                                                                                  |
| Fat that is spread (thick amount) onto large bap: ticked butter, low fat                                                      | bread_large_bap_spread_butter_lowfat_thick        | 15:      | bread_large_bap_spread_butter_lowfat_thick        | 18.75:   | 25%:125% of the weight on a bread roll                                                                                  |
| Fat that is spread (thin amount) onto large bap: ticked butter, low fat                                                       | bread_large_bap_spread_butter_lowfat_thin         | 10:      | bread_large_bap_spread_butter_lowfat_thin         | 12.5:    | 25%:125% of the weight on a bread roll                                                                                  |
| Fat that is spread (medium amount) onto large bap: ticked spreadable butter with normal amount of % fat                       | bread_large_bap_spread_butter_spread_fat_med      | 12:      | bread_large_bap_spread_butter_spread_fat_med      | 15:      | 25%:125% of the weight on a bread roll                                                                                  |
| Fat that is spread (thick amount) onto large bap: ticked spreadable butter with normal amount of % fat                        | bread_large_bap_spread_butter_spread_fat_thick    | 15:      | bread_large_bap_spread_butter_spread_fat_thick    | 18.75:   | 25%:125% of the weight on a bread roll                                                                                  |
| Fat that is spread (thin amount) onto large bap: ticked spreadable butter with normal amount of % fat                         | bread_large_bap_spread_butter_spread_fat_thin     | 10:      | bread_large_bap_spread_butter_spread_fat_thin     | 12.5:    | 25%:125% of the weight on a bread roll                                                                                  |
| Fat that is spread (medium amount) onto large bap: ticked spreadable butter, low fat                                          | bread_large_bap_spread_butter_spread_lowfat_med   | 12:      | bread_large_bap_spread_butter_spread_lowfat_med   | 15:      | 25%:125% of the weight on a bread roll                                                                                  |
| Fat that is spread (thick amount) onto large bap: ticked spreadable butter, low fat                                           | bread_large_bap_spread_butter_spread_lowfat_thick | 15:      | bread_large_bap_spread_butter_spread_lowfat_thick | 18.75:   | 25%:125% of the weight on a bread roll                                                                                  |
| Fat that is spread (thin amount) onto large bap: ticked spreadable butter, low fat                                            | bread_large_bap_spread_butter_spread_lowfat_thin  | 10:      | bread_large_bap_spread_butter_spread_lowfat_thin  | 12.5:    | 25%:125% of the weight on a bread roll                                                                                  |
| Fat that is spread (medium amount) onto large bap: ticked dairy spread which is also cholesterol lowering e.g Benecol Buttery | bread_large_bap_spread_dairy_chol_med             | 12:      | bread_large_bap_spread_dairy_chol_med             | 12.5:    | 25%:125% of the weight on a bread roll                                                                                  |
| Fat that is spread (thick amount) onto large bap: ticked dairy spread which is also cholesterol lowering e.g Benecol Buttery  | bread_large_bap_spread_dairy_chol_thick           | 15:      | bread_large_bap_spread_dairy_chol_thick           | 15:      | 25%:125% of the weight on a bread roll                                                                                  |
| Fat that is spread (thin amount) onto large bap: ticked dairy spread which is also cholesterol lowering e.g Benecol Buttery   | bread_large_bap_spread_dairy_chol_thin            | 7:       | bread_large_bap_spread_dairy_chol_thin            | 8.75:    | 25%:125% of the weight on a bread roll                                                                                  |
| Fat that is spread (medium amount) onto large bap: ticked dairy spread but not specified amount of % fat                      | bread_large_bap_spread_dairy_dunno_med            | 10:      | bread_large_bap_spread_dairy_dunno_med            | 12.5:    | 25%:125% of the weight on a bread roll; food composition as low fat and reduced fat                                     |
| Fat that is spread (thick amount) onto large bap: ticked dairy spread but not specified amount of % fat                       | bread_large_bap_spread_dairy_dunno_thick          | 12:      | bread_large_bap_spread_dairy_dunno_thick          | 15:      | 25%:125% of the weight on a bread roll; food composition as low fat and reduced fat                                     |
| Fat that is spread (thin amount) onto large bap: ticked dairy spread but not specified amount of % fat                        | bread_large_bap_spread_dairy_dunno_thin           | 7:       | bread_large_bap_spread_dairy_dunno_thin           | 8.75:    | 25%:125% of the weight on a bread roll; food composition as low fat and reduced fat                                     |
| Fat that is spread (medium amount) onto large bap: ticked dairy spread with normal amount of % fat                            | bread_large_bap_spread_dairy_fat_med              | 10:      | bread_large_bap_spread_dairy_fat_med              | 12.5:    | 25%:125% of the weight on a bread roll; normal fat is taken as reduced fat (up to 62% fat)                              |
| Fat that is spread (thick amount) onto large bap: ticked dairy spread with normal amount of % fat                             | bread_large_bap_spread_dairy_fat_thick            | 12:      | bread_large_bap_spread_dairy_fat_thick            | 15:      | 25%:125% of the weight on a bread roll; normal fat is taken as reduced fat (up to 62% fat)                              |
| Fat that is spread (thin amount) onto large bap: ticked dairy spread with normal amount of % fat                              | bread_large_bap_spread_dairy_fat_thin             | 7:       | bread_large_bap_spread_dairy_fat_thin             | 8.75:    | 25%:125% of the weight on a bread roll; normal fat is taken as reduced fat (up to 62% fat)                              |
| Fat that is spread (medium amount) onto large bap: ticked dairy spread, low fat                                               | bread_large_bap_spread_dairy_lowfat_med           | 10:      | bread_large_bap_spread_dairy_lowfat_med           | 12.5:    | 25%:125% of the weight on a bread roll                                                                                  |
| Fat that is spread (thick amount) onto large bap: ticked dairy spread, low fat                                                | bread_large_bap_spread_dairy_lowfat_thick         | 12:      | bread_large_bap_spread_dairy_lowfat_thick         | 15:      | 25                                                                                                                      |

|                                                                                                                                                 | McCance and Widdowson's                        | Portion: | Nutrient databank + other changes              | Portion: | Portion:                                                                                                                                    |
|-------------------------------------------------------------------------------------------------------------------------------------------------|------------------------------------------------|----------|------------------------------------------------|----------|---------------------------------------------------------------------------------------------------------------------------------------------|
| Variable description                                                                                                                            | Food item                                      | size:    | Food item                                      | size:    | diff%:Description of differences with previous version                                                                                      |
| Large bap, stotty, pitta bread: not specified type so includes white, brown, granary, wheatgerm, wholemeal                                      | :bread_large_bap_unanswered                    | 90:      | :bread_large_bap_unanswered                    | 90:      | 0%                                                                                                                                          |
| Large bap, stotty, pitta bread: white                                                                                                           | :bread_large_bap_white                         | 90:      | :bread_large_bap_white                         | 90:      | 0%                                                                                                                                          |
| Large bap, stotty, pitta bread: wholemeal                                                                                                       | :bread_large_bap_wholemeal                     | 90:      | :bread_large_bap_wholemeal                     | 90:      | 0%                                                                                                                                          |
| Naan bread plain                                                                                                                                | :bread_naam                                    | 160:     | :bread_naam                                    | 160:     | 0%                                                                                                                                          |
| Other bread e.g crumpets, tortilla wraps, breadsticks                                                                                           | :bread_other                                   | 45:      | :bread_other                                   | 45:      | 0%                                                                                                                                          |
| Other bread e.g crumpets, tortilla wraps, breadsticks                                                                                           | :bread_other_gf                                | 45:      | :bread_other_gf                                | 45:      | -:Gluten free version added to the updated version (however no gluten free code available at the time so the non-gluten free code was used) |
| Fat that is spread (medium amount) onto bread other: ticked butter but not specified amount of % fat                                            | :bread_other_spread_butter_dunno_med           | 7:       | :bread_other_spread_butter_dunno_med           | 12:      | 71%:as weight on a bread roll; food composition as butter and spreadable butter                                                             |
| Fat that is spread (thick amount) onto bread other: ticked butter but not specified amount of % fat                                             | :bread_other_spread_butter_dunno_thick         | 10:      | :bread_other_spread_butter_dunno_thick         | 15:      | 50%:as weight on a bread roll; food composition as butter and spreadable butter                                                             |
| Fat that is spread (thin amount) onto bread other: ticked butter but not specified amount of % fat                                              | :bread_other_spread_butter_dunno_thin          | 5:       | :bread_other_spread_butter_dunno_thin          | 10:      | 100%:as weight on a bread roll; food composition as butter and spreadable butter                                                            |
| Fat that is spread (medium amount) onto bread other: ticked butter, normal amount of % fat                                                      | :bread_other_spread_butter_fat_med             | 7:       | :bread_other_spread_butter_fat_med             | 12:      | 71%:as weight on a bread roll                                                                                                               |
| Fat that is spread (thick amount) onto bread other: ticked butter, normal amount of % fat                                                       | :bread_other_spread_butter_fat_thick           | 10:      | :bread_other_spread_butter_fat_thick           | 15:      | 50%:as weight on a bread roll                                                                                                               |
| Fat that is spread (thin amount) onto bread other: ticked butter, normal amount of % fat                                                        | :bread_other_spread_butter_fat_thin            | 5:       | :bread_other_spread_butter_fat_thin            | 10:      | 100%:as weight on a bread roll                                                                                                              |
| Fat that is spread (medium amount) onto bread other: ticked butter, low fat                                                                     | :bread_other_spread_butter_lowfat_med          | 7:       | :bread_other_spread_butter_lowfat_med          | 12:      | 71%:as weight on a bread roll                                                                                                               |
| Fat that is spread (thick amount) onto bread other: ticked butter, low fat                                                                      | :bread_other_spread_butter_lowfat_thick        | 10:      | :bread_other_spread_butter_lowfat_thick        | 15:      | 50%:as weight on a bread roll                                                                                                               |
| Fat that is spread (thin amount) onto bread other: ticked butter, low fat                                                                       | :bread_other_spread_butter_lowfat_thin         | 5:       | :bread_other_spread_butter_lowfat_thin         | 10:      | 100%:as weight on a bread roll                                                                                                              |
| Fat that is spread (medium amount) onto bread other: ticked spreadable butter with normal amount of % fat                                       | :bread_other_spread_butter_spread_fat_med      | 7:       | :bread_other_spread_butter_spread_fat_med      | 12:      | 71%:as weight on a bread roll                                                                                                               |
| Fat that is spread (thick amount) onto bread other: ticked spreadable butter with normal amount of % fat                                        | :bread_other_spread_butter_spread_fat_thick    | 10:      | :bread_other_spread_butter_spread_fat_thick    | 15:      | 50%:as weight on a bread roll                                                                                                               |
| Fat that is spread (thin amount) onto bread other: ticked spreadable butter with normal amount of % fat                                         | :bread_other_spread_butter_spread_fat_thin     | 5:       | :bread_other_spread_butter_spread_fat_thin     | 10:      | 100%:as weight on a bread roll                                                                                                              |
| Fat that is spread (medium amount) onto bread other: ticked spreadable butter, low fat                                                          | :bread_other_spread_butter_spread_lowfat_med   | 7:       | :bread_other_spread_butter_spread_lowfat_med   | 12:      | 71%:as weight on a bread roll                                                                                                               |
| Fat that is spread (thick amount) onto bread other: ticked spreadable butter, low fat                                                           | :bread_other_spread_butter_spread_lowfat_thick | 10:      | :bread_other_spread_butter_spread_lowfat_thick | 15:      | 50%:as weight on a bread roll                                                                                                               |
| Fat that is spread (thin amount) onto bread other: ticked spreadable butter, low fat                                                            | :bread_other_spread_butter_spread_lowfat_thin  | 5:       | :bread_other_spread_butter_spread_lowfat_thin  | 10:      | 100%:as weight on a bread roll                                                                                                              |
| Fat that is spread (medium amount) onto bread other: ticked dairy spread which is also cholesterol lowering e.g Benecol Buttery                 | :bread_other_spread_dairy_chol_med             | 5:       | :bread_other_spread_dairy_chol_med             | 10:      | 100%:as weight on a bread roll                                                                                                              |
| Fat that is spread (thick amount) onto bread other: ticked dairy spread which is also cholesterol lowering e.g Benecol Buttery                  | :bread_other_spread_dairy_chol_thick           | 7:       | :bread_other_spread_dairy_chol_thick           | 12:      | 71%:as weight on a bread roll                                                                                                               |
| Fat that is spread (thin amount) onto bread other: ticked dairy spread which is also cholesterol lowering e.g Benecol Buttery                   | :bread_other_spread_dairy_chol_thin            | 3:       | :bread_other_spread_dairy_chol_thin            | 7:       | 133%:as weight on a bread roll                                                                                                              |
| Fat that is spread (medium amount) onto bread other: ticked dairy spread but not specified amount of % fat                                      | :bread_other_spread_dairy_dunno_med            | 5:       | :bread_other_spread_dairy_dunno_med            | 10:      | 100%:as weight on a bread roll; food composition as low fat and reduced fat                                                                 |
| Fat that is spread (thick amount) onto bread other: ticked dairy spread but not specified amount of % fat                                       | :bread_other_spread_dairy_dunno_thick          | 7:       | :bread_other_spread_dairy_dunno_thick          | 12:      | 71%:as weight on a bread roll; food composition as low fat and reduced fat                                                                  |
| Fat that is spread (thin amount) onto bread other: ticked dairy spread but not specified amount of % fat                                        | :bread_other_spread_dairy_dunno_thin           | 3:       | :bread_other_spread_dairy_dunno_thin           | 7:       | 133%:as weight on a bread roll; food composition as low fat and reduced fat                                                                 |
| Fat that is spread (medium amount) onto bread other: ticked dairy spread with normal amount of % fat                                            | :bread_other_spread_dairy_fat_med              | 5:       | :bread_other_spread_dairy_fat_med              | 10:      | 100%:as weight on a bread roll; normal fat is taken as reduced fat (up to 62% fat)                                                          |
| Fat that is spread (thick amount) onto bread other: ticked dairy spread with normal amount of % fat                                             | :bread_other_spread_dairy_fat_thick            | 7:       | :bread_other_spread_dairy_fat_thick            | 12:      | 71%:as weight on a bread roll; normal fat is taken as reduced fat (up to 62% fat)                                                           |
| Fat that is spread (thin amount) onto bread other: ticked dairy spread with normal amount of % fat                                              | :bread_other_spread_dairy_fat_thin             | 3:       | :bread_other_spread_dairy_fat_thin             | 7:       | 133%:as weight on a bread roll; normal fat is taken as reduced fat (up to 62% fat)                                                          |
| Fat that is spread (medium amount) onto bread other: ticked dairy spread, low fat                                                               | :bread_other_spread_dairy_lowfat_med           | 5:       | :bread_other_spread_dairy_lowfat_med           | 10:      | 100%:as weight on a bread roll                                                                                                              |
| Fat that is spread (thick amount) onto bread other: ticked dairy spread, low fat                                                                | :bread_other_spread_dairy_lowfat_thick         | 7:       | :bread_other_spread_dairy_lowfat_thick         | 12:      | 71%:as weight on a bread roll                                                                                                               |
| Fat that is spread (thin amount) onto bread other: ticked dairy spread, low fat                                                                 | :bread_other_spread_dairy_lowfat_thin          | 3:       | :bread_other_spread_dairy_lowfat_thin          | 7:       | 133%:as weight on a bread roll                                                                                                              |
| Fat that is spread (medium amount) onto bread other: ticked dairy spread, very low fat                                                          | :bread_other_spread_dairy_vlowfat_med          | 5:       | :bread_other_spread_dairy_vlowfat_med          | 10:      | 100%:as weight on a bread roll; food composition as low fat spread                                                                          |
| Fat that is spread (thick amount) onto bread other: ticked dairy spread, very low fat                                                           | :bread_other_spread_dairy_vlowfat_thick        | 7:       | :bread_other_spread_dairy_vlowfat_thick        | 12:      | 71%:as weight on a bread roll; food composition as low fat spread                                                                           |
| Fat that is spread (thin amount) onto bread other: ticked dairy spread, very low fat                                                            | :bread_other_spread_dairy_vlowfat_thin         | 3:       | :bread_other_spread_dairy_vlowfat_thin         | 7:       | 133%:as weight on a bread roll; food composition as low fat spread                                                                          |
| Fat that is spread (medium amount) onto bread other: not specified type of spread but ticked cholesterol lowering e.g Benecol, Flora pro active | :bread_other_spread_dunno_chol_med             | 5:       | :bread_other_spread_dunno_chol_med             | 10:      | 100%:as weight on a bread roll                                                                                                              |
| Fat that is spread (thick amount) onto bread other: not specified type of spread but ticked cholesterol lowering e.g Benecol, Flora pro active  | :bread_other_spread_dunno_chol_thick           | 7:       | :bread_other_spread_dunno_chol_thick           | 12:      | 71%:as weight on a bread roll                                                                                                               |
| Fat that is spread (thin amount) onto bread other: not specified type of spread but ticked cholesterol lowering e.g Benecol, Flora pro active   | :bread_other_spread_dunno_chol_thin            | 3:       | :bread_other_spread_dunno_chol_thin            | 7:       | 133%:as weight on a bread roll                                                                                                              |
| Fat that is spread (medium amount) onto bread other: not specified type of spread or amount of % fat                                            | :bread_other_spread_dunno_dunno_med            | 5:       | :bread_other_spread_dunno_dunno_med            | 10:      | 100%:as weight on a bread roll                                                                                                              |
| Fat that is spread (thick amount) onto bread other: not specified type of spread or amount of % fat                                             | :bread_other_spread_dunno_dunno_thick          | 7:       | :bread_other_spread_dunno_dunno_thick          | 12:      | 71%:as weight on a bread roll                                                                                                               |
| Fat that is spread (thin amount) onto bread other: not specified type of spread or amount of % fat                                              | :bread_other_spread_dunno_dunno_thin           | 3:       | :bread_other_spread_dunno_dunno_thin           | 7:       | 133%:as weight on a bread roll                                                                                                              |
| Fat that is spread (medium amount) onto bread other: not specified type of spread but ticked normal amount % fat                                | :bread_other_spread_dunno_fat_med              | 5:       | :bread_other_spread_dunno_fat_med              | 10:      | 100%:as weight on a bread roll; normal fat is taken as reduced fat (up to 62% fat)                                                          |
| Fat that is spread (thick amount) onto bread other: not specified type of spread but ticked normal amount % fat                                 | :bread_other_spread_dunno_fat_thick            | 7:       | :bread_other_spread_dunno_fat_thick            | 12:      | 71%:as weight on a bread roll; normal fat is taken as reduced fat (up to 62% fat)                                                           |
| Fat that is spread (thin amount) onto bread other: not specified type of spread but ticked normal amount % fat                                  | :bread_other_spread_dunno_fat_thin             | 3:       | :bread_other_spread_dunno_fat_thin             | 7:       | 133%:as weight on a bread roll; normal fat is taken as reduced fat (up to 62% fat)                                                          |
| Fat that is spread (medium amount) onto bread other: not specified type of spread but ticked low fat                                            | :bread_other_spread_dunno_lowfat_med           | 5:       | :bread_other_spread_dunno_lowfat_med           | 10:      | 100%:as weight on a bread roll                                                                                                              |
| Fat that is spread (thick amount) onto bread other: not specified type of spread but ticked low fat                                             | :bread_other_spread_dunno_lowfat_thick         | 7:       | :bread_other_spread_dunno_lowfat_thick         | 12:      | 71%:as weight on a bread roll                                                                                                               |
| Fat that is spread (thin amount) onto bread other: not specified type of spread but ticked low fat                                              | :bread_other_spread_dunno_lowfat_thin          | 3:       | :bread_other_spread_dunno_lowfat_thin          | 7:       | 133%:as weight on a bread roll                                                                                                              |
| Fat that is spread (medium amount) onto bread other: not specified type of spread but ticked very low fat                                       | :bread_other_spread_dunno_vlowfat_med          | 5:       | :bread_other_spread_dunno_vlowfat_med          | 10:      | 100%:as weight on a bread roll; food composition as low fat spread                                                                          |
| Fat that is spread (thick amount) onto bread other: not specified type of spread but ticked very low fat                                        | :bread_other_spread_dunno_vlowfat_thick        | 7:       | :bread_other_spread_dunno_vlowfat_thick        | 12:      | 71%:as weight on a bread roll; food composition as low fat spread                                                                           |
| Fat that is spread (thin amount) onto bread other: not specified type of spread but ticked very low fat                                         | :bread_other_spread_dunno_vlowfat_thin         | 3:       | :bread_other_spread_dunno_vlowfat_thin         | 7:       | 133%:as weight on a bread roll; food composition as low fat spread                                                                          |
| Fat that is spread (medium amount) onto bread other: ticked hard margarine (hard block margarine in wrapper)                                    | :bread_other_spread_hardmarg_med               | 7:       | :bread_other_spread_hardmarg_med               | 12:      | 71%:as weight on a bread roll; spread weight as butter                                                                                      |
| Fat that is spread (thick amount) onto bread other: ticked hard margarine (hard block margarine in wrapper)                                     | :bread_other_spread_hardmarg_thick             | 10:      | :bread_other_spread_hardmarg_thick             | 15:      | 50%:as weight on a bread roll; spread weight as butter                                                                                      |
| Fat that is spread (thin amount) onto bread other: ticked hard margarine (hard block margarine in wrapper)                                      | :bread_other_spread_hardmarg_thin              | 5:       | :bread_other_spread_hardmarg_thin              | 10:      | 100%:as weight on a bread roll; spread weight as butter                                                                                     |
| Fat that is spread (medium amount) onto bread other: ticked cholesterol lowering olive spread e.g Beneco/Flora pro active olive spread          | :bread_other_spread_olive_chol_med             | 5:       | :bread_other_spread_olive_chol_med             | 10:      | 100%:as weight on a bread roll                                                                                                              |
| Fat that is spread (thick amount) onto bread other: ticked cholesterol lowering olive spread e.g Beneco/Flora pro active olive spread           | :bread_other_spread_olive_chol_thick           | 7:       | :bread_other_spread_olive_chol_thick           | 12:      | 71%:as weight on a bread roll                                                                                                               |
| Fat that is spread (thin amount) onto bread other: ticked cholesterol lowering olive spread e.g Beneco/Flora pro active olive spread            | :bread_other_spread_olive_chol_thin            | 3:       | :bread_other_spread_olive_chol_thin            | 7:       | 133%:as weight on a bread roll                                                                                                              |
| Fat that is spread (medium amount) onto bread other: ticked olive spread but not specified amount of fat                                        | :bread_other_spread_olive_dunno_med            | 5:       | :bread_other_spread_olive_dunno_med            | 10:      | 100%:as weight on a bread roll                                                                                                              |
| Fat that is spread (thick amount) onto bread other: ticked olive spread but not specified amount of fat                                         | :bread_other_spread_olive_dunno_thick          | 7:       | :bread_other_spread_olive_dunno_thick          | 12:      | 71%:as weight on a bread roll                                                                                                               |
| Fat that is spread (thin amount) onto bread other: ticked olive spread but not specified amount of fat                                          | :bread_other_spread_olive_dunno_thin           | 3:       | :bread_other_spread_olive_dunno_thin           | 7:       | 133%:as weight on a bread roll                                                                                                              |
| Fat that is spread (medium amount) onto bread other: ticked olive spread with normal amount of % fat                                            | :bread_other_spread_olive_fat_med              | 5:       | :bread_other_spread_olive_fat_med              | 10:      | 100%:as weight on a bread roll; normal fat is taken as reduced fat (up to 62% fat)                                                          |
| Fat that is spread (thick amount) onto bread other: ticked olive spread with normal amount of % fat                                             | :bread_other_spread_olive_fat_thick            | 7:       | :bread_other_spread_olive_fat_thick            | 12:      | 71%:as weight on a bread roll; normal fat is taken as reduced fat (up to 62% fat)                                                           |
| Fat that is spread (thin amount) onto bread other: ticked olive spread with normal amount of % fat                                              | :bread_other_spread_olive_fat_thin             | 3:       | :bread_other_spread_olive_fat_thin             | 7:       | 133%:as weight on a bread roll; normal fat is taken as reduced fat (up to 62% fat)                                                          |
| Fat that is spread (medium amount) onto bread other: ticked olive spread, low fat                                                               | :bread_other_spread_olive_lowfat_med           | 5:       | :bread_other_spread_olive_lowfat_med           | 10:      | 100%:as weight on a bread roll                                                                                                              |
| Fat that is spread (thick amount) onto bread other: ticked olive spread, low fat                                                                | :bread_other_spread_olive_lowfat_thick         | 7:       | :bread_other_spread_olive_lowfat_thick         | 12:      | 71%:as weight on a bread roll                                                                                                               |
| Fat that is spread (thin amount) onto bread other: ticked olive spread, low fat                                                                 | :bread_other_spread_olive_lowfat_thin          | 3:       | :bread_other_spread_olive_lowfat_thin          | 7:       | 133%:as weight on a bread roll                                                                                                              |
| Fat that is spread (medium amount) onto bread other: ticked olive spread, very low fat                                                          | :bread_other_spread_olive_vlowfat_med          | 5:       | :bread_other_spread_olive_vlowfat_med          | 10:      | 100%:as weight on a bread roll; food composition as low fat spread                                                                          |
| Fat that is spread (thick amount) onto bread other: ticked olive spread, very low fat                                                           | :bread_other_spread_olive_vlowfat_thick        | 7:       | :bread_other_spread_olive_vlowfat_thick        | 12:      | 71%:as weight on a bread roll; food composition as low fat spread                                                                           |
| Fat that is spread (thin amount) onto bread other: ticked olive spread, very low fat                                                            | :bread_other_spread_olive_vlowfat_thin         | 3:       | :bread_other_spread_olive_vlowfat_thin         | 7:       | 133%:as weight on a bread roll; food composition as low fat spread                                                                          |
| Fat that is spread (medium amount) onto bread other: ticked other spread e.g ghee                                                               | :bread_other_spread_other_med                  | 5:       | :bread_other_spread_other_med                  | 10:      | 100%:as weight on a bread roll                                                                                                              |
| Fat that is spread (thick amount) onto bread other: ticked other spread e.g ghee                                                                | :bread_other_spread_other_thick                | 7:       | :bread_other_spread_other_thick                | 12:      | 71%:as weight on a bread roll                                                                                                               |
| Fat that is spread (thin amount) onto bread other: ticked other spread e.g ghee                                                                 | :bread_other_spread_other_thin                 | 3:       | :bread_other_spread_other_thin                 | 7:       | 133%:as weight on a bread roll                                                                                                              |
| Fat that is spread (medium amount) onto bread other: ticked polyunsaturated margarine (e.g Flora) and also cholesterol lowering                 | :bread_other_spread_polymarg_chol_med          | 5:       | :bread_other_spread_polymarg_chol_med          | 10:      | 100%:as weight on a bread roll                                                                                                              |
| Fat that is spread (thick amount) onto bread other: ticked polyunsaturated margarine (e.g Flora) and also cholesterol lowering                  | :bread_other_spread_polymarg_chol_thick        | 7:       | :bread_other_spread_polymarg_chol_thick        | 12:      | 71%:as weight on a bread roll                                                                                                               |
| Fat that is spread (thin amount) onto bread other: ticked polyunsaturated margarine (e.g Flora) and also cholesterol lowering                   | :bread_other_spread_polymarg_chol_thin         | 3:       | :bread_other_spread_polymarg_chol_thin         | 7:       | 133%:as weight on a bread roll                                                                                                              |
| Fat that is spread (medium amount) onto bread other: ticked polyunsaturated margarine (e.g Flora) but not specified amount of fat               | :bread_other_spread_polymarg_dunno_med         | 5:       | :bread_other_spread_polymarg_dunno_med         | 10:      | 100%:as weight on a bread roll                                                                                                              |
| Fat that is spread (thick amount) onto bread other: ticked polyunsaturated margarine (e.g Flora) but not specified amount of fat                | :bread_other_spread_polymarg_dunno_thick       | 7:       | :bread_other_spread_polymarg_dunno_thick       | 12:      | 71%:as weight on a bread roll                                                                                                               |
| Fat that is spread (thin amount) onto bread other: ticked polyunsaturated margarine (e.g Flora) but not specified amount of fat                 | :bread_other_spread_polymarg_dunno_thin        | 3:       | :bread_other_spread_polymarg_dunno_thin        | 7:       | 133%:as weight on a bread roll                                                                                                              |
| Fat that is spread (medium amount) onto bread other: ticked polyunsaturated margarine (e.g Flora), normal amount of % fat                       | :bread_other_spread_polymarg_fat_med           | 5:       | :bread_other_spread_polymarg_fat_med           | 10:      | 100%:as weight on a bread roll; normal fat is taken as reduced fat (up to 62% fat)                                                          |
| Fat that is spread (thick amount) onto bread other: ticked polyunsaturated margarine (e.g Flora), normal amount of % fat                        | :bread_other_spread_polymarg_fat_thick         | 7:       | :bread_other_spread_polymarg_fat_thick         | 12:      | 71%:as weight on a bread roll; normal fat is taken as reduced fat (up to 62% fat)                                                           |
| Fat that is spread (thin amount) onto bread other: ticked polyunsaturated margarine (e.g Flora), normal amount of % fat                         | :bread_other_spread_polymarg_fat_thin          | 3:       | :bread_other_spread_polymarg_fat_thin          | 7:       | 133%:as weight on a bread roll; normal fat is taken as reduced fat (up to 62% fat)                                                          |
| Fat that is spread (medium amount) onto bread other: ticked polyunsaturated margarine (e.g Flora), low fat                                      | :bread_other_spread_polymarg_lowfat_med        | 5:       | :bread_other_spread_polymarg_lowfat_med        | 10:      | 100%:as weight on a bread roll                                                                                                              |
| Fat that is spread (thick amount) onto bread other: ticked polyunsaturated margarine (e.g Flora), low fat                                       | :bread_other_spread_polymarg_lowfat_thick      | 7:       | :bread_other_spread_polymarg_lowfat_thick      | 12:      | 71%:as weight on a bread roll                                                                                                               |
| Fat that is spread (thin amount) onto bread other: ticked polyunsaturated margarine (e.g Flora), low fat                                        | :bread_other_spread_polymarg_lowfat_thin       | 3:       | :bread_other_spread_polymarg_lowfat_thin       | 7:       | 133%:as weight on a bread roll                                                                                                              |
| Fat that is spread (medium amount) onto bread other: ticked polyunsaturated margarine (e.g Flora), very low fat                                 | :bread_other_spread_polymarg_vlowfat_med       | 5:       | :bread_other_spread_polymarg_vlowfat_med       | 10:      | 100%:as weight on a bread roll; food composition as low fat spread                                                                          |
| Fat that is spread (thick amount) onto bread other: ticked polyunsaturated margarine (e.g Flora), very low fat                                  | :bread_other_spread_polymarg_vlowfat_thick     | 7:       | :bread_other_spread_polymarg_vlowfat_thick     | 12:      | 71%:as weight on a bread roll; food composition as low fat spread                                                                           |
| Fat that is spread (thin amount) onto bread other: ticked polyunsaturated margarine (e.g Flora), very low fat                                   | :bread_other_spread_polymarg_vlowfat_thin      | 3:       | :bread_other_spread_polymarg_vlowfat_thin      | 7:       | 133%:as weight on a bread roll; food composition as low fat spread                                                                          |
| Fat that is spread (medium amount) onto bread other: ticked soya/vegan/dairy free margarine e.g Pure, and also cholesterol lowering             | :bread_other_spread_soya_chol_med              | 5:       | :bread_other_spread_soya_chol_med              | 10:      | 100%:as weight on a bread roll                                                                                                              |
| Fat that is spread (thick amount) onto bread other: ticked soya/vegan/dairy free margarine e.g Pure, and also cholesterol lowering              | :bread_other_spread_soya_chol_thick            | 7:       | :bread_other_spread_soya_chol_thick            | 12:      | 71%:as weight on a bread roll                                                                                                               |
| Fat that is spread (thin amount) onto bread other: ticked soya/vegan/dairy free margarine e.g Pure, and not specified amount of fat             | :bread_other_spread_soya_chol_thin             | 3:       | :bread_other_spread_soya_chol_thin             | 7:       | 133%:as weight on a bread roll                                                                                                              |
| Fat that is spread (medium amount) onto bread other: ticked soya/vegan/dairy free margarine e.g Pure, and not specified amount of fat           | :bread_other_spread_soya_dunno_med             | 5:       | :bread_other_spread_soya_dunno_med             | 10:      | 100%:as weight on a bread roll                                                                                                              |
| Fat that is spread (thick amount) onto bread other: ticked soya/vegan/dairy free margarine e.g Pure, and not specified amount of fat            | :bread_other_spread_soya_dunno_thick           | 7:       | :bread_other_spread_soya_dunno_thick           | 12:      | 71%:as weight on a bread roll                                                                                                               |
| Fat that is spread (thin amount) onto bread other: ticked soya/vegan/dairy free margarine e.g Pure, and not specified amount of fat             | :bread_other_spread_soya_dunno_thin            | 3:       | :bread_other_spread_soya_dunno_thin            | 7:       | 133%:as weight on a bread roll                                                                                                              |
| Fat that is spread (medium amount) onto bread other: ticked soya/vegan/dairy free margarine (e.g Pure), normal amount % fat                     | :bread_other_spread_soya_fat_med               | 5:       | :bread_other_spread_soya_fat_med               | 10:      | 100%:as weight on a bread roll                                                                                                              |
| Fat that is spread (thick amount) onto bread other: ticked soya/vegan/dairy free margarine (e.g Pure), normal amount % fat                      | :bread_other_spread_soya_fat_thick             | 7:       | :bread_other_spread_soya_fat_thick             | 12:      | 71%:as weight on a bread roll                                                                                                               |
| Fat that is spread (thin amount) onto bread other: ticked soya/vegan/dairy free margarine (e.g Pure), normal amount % fat                       | :bread_other_spread_soya_fat_thin              | 3:       | :bread_other_spread_soya_fat_thin              | 7:       | 133%:as weight on a bread roll                                                                                                              |
| Fat that is spread (medium amount) onto bread other: ticked soya/vegan/dairy free margarine (e.g Pure), low fat                                 | :bread_other_spread_soya_lowfat_med            | 5:       | :bread_other_spread_soya_lowfat_med            | 10:      | 100%:as weight on a bread roll                                                                                                              |
| Fat that is spread (thick amount) onto bread other: ticked soya/vegan/dairy free margarine (e.g Pure), low fat                                  | :bread_other_spread_soya_lowfat_thick          | 7:       | :bread_other_spread_soya_lowfat_thick          | 12:      | 71%:as weight on a bread roll                                                                                                               |
| Fat that is spread (thin amount) onto bread other: ticked soya/vegan/dairy free margarine (e.g Pure), low fat                                   | :bread_other_spread_soya_lowfat_thin           | 3:       | :bread_other_spread_soya_lowfat_thin           | 7:       | 133%:as weight on a bread roll                                                                                                              |
| Fat that is spread (medium amount) onto bread other: ticked soya/vegan/dairy free margarine (e.g Pure), very low fat                            | :bread_other_spread_soya_vlowfat_med           | 5:       | :bread_other_spread_soya_vlowfat_med           | 10:      | 100%:as weight on a bread roll; food composition as low fat spread                                                                          |
| Fat that is spread (thick amount) onto bread other: ticked soya/vegan/dairy free margarine (e.g Pure), very low fat                             | :bread_other_spread_soya_vlowfat_thick         | 7:       | :bread_other_spread_soya_vlowfat_thick         | 12:      | 71%:as weight on a bread roll; food composition as low fat spread                                                                           |
| Fat that is spread (thin amount) onto bread other: ticked soya/vegan/dairy free margarine (e.g Pure), very low fat                              | :bread_other_spread_soya_vlowfat_thin          | 3:       | :bread_other_spread_soya_vlowfat_thin          | 7:       | 133%:as weight on a bread roll; food composition as low fat spread                                                                          |
| Gluten free bread roll, bap, bun, bagel: brown or white with added fibre                                                                        | :bread_roll_gf_nonwhite                        | 60:      | :bread_roll_gf_nonwhite                        | 60:      | -:Gluten free version added to the updated version                                                                                          |
| Gluten free bread roll, bap, burger bun, hot dog roll, bagel: not specified type so includes white, brown or with added fibre                   | :bread_roll_gf_unanswered                      | 60:      | :bread_roll_gf_unanswered                      | 60:      | -:Gluten free version added to the updated version                                                                                          |
| Gluten free bread roll, bap, burger bun, hot dog roll, bagel: white                                                                             | :bread_roll_gf_white                           | 60:      | :bread_roll_gf_white                           | 60:      | -:Gluten free version added to the updated version                                                                                          |
| Bread roll, bap, bun, bagel: brown, granary, wheatgerm, 50/50                                                                                   | :bread_roll_mixed                              | 60:      | :bread_roll_mixed                              | 60:      | 0%                                                                                                                                          |
| Bread roll, bap, bun, bagel: wheatgerm, rye, white sliced                                                                                       | :bread_roll_other                              | 60:      | :bread_roll_other                              | 60:      | 0%                                                                                                                                          |
| Seeds for seeded bread: e.g sesame, sunflower, poppy                                                                                            | :bread_roll_seeded                             | 3:       | :bread_roll_seeded                             | 3:       | 0%                                                                                                                                          |
| Fat that is spread (medium amount) onto bread roll: ticked butter but not specified amount of % fat                                             | :bread_roll_spread_butter_dunno_med            | 15:      | :bread_roll_spread_butter_dunno_med            | 12:      | -20%:Food portion sizes / MAFF; food composition as butter and spreadable butter; corrected typo in weight                                  |

[illegible]



[illegible]

Supplementary Table 1

|                                                                                                                            | McCance and Widdowson's           |              | Nutrient databank + other changes           |              |                                                                                                                                                      |
|----------------------------------------------------------------------------------------------------------------------------|-----------------------------------|--------------|---------------------------------------------|--------------|------------------------------------------------------------------------------------------------------------------------------------------------------|
| Variable description                                                                                                       | Food item                         | Portion size | Food item                                   | Portion size | Portion diff%                                                                                                                                        |
| Porridge (including instant) made with cholesterol lowering milk and added dried fruit                                     | :cereal_porridge_milk_driedfruit  | 203.5        | :cereal_porridge_milk_chol_driedfruit       | 233.5        | 15%:Milk type taken into account in the updated version + portion size increased to account for dried fruit added after cooking                      |
| Porridge (including instant) made with milk (cow's) unspecified (e.g semi skimmed, skimmed, 1% milk)                       | :cereal_porridge_milk             | 203.5        | :cereal_porridge_milk_dontknow              | 203.5        | 0%:Milk type taken into account in the updated version                                                                                               |
| Porridge (including instant) made with milk (cow's) unspecified (e.g semi skimmed, skimmed, 1% milk) and added dried fruit | :cereal_porridge_milk_driedfruit  | 203.5        | :cereal_porridge_milk_dontknow_driedfruit   | 233.5        | 15%:Milk type taken into account in the updated version + portion size increased to account for dried fruit added after cooking                      |
| Porridge (including instant) made with goats or sheep milk                                                                 | :cereal_porridge_milk             | 203.5        | :cereal_porridge_milk_goatsheep             | 203.5        | 0%:Milk type taken into account in the updated version                                                                                               |
| Porridge (including instant) made with goats or sheep milk and added dried fruit                                           | :cereal_porridge_milk_driedfruit  | 203.5        | :cereal_porridge_milk_goatsheep_driedfruit  | 233.5        | 15%:Milk type taken into account in the updated version + portion size increased to account for dried fruit added after cooking                      |
| Porridge (including instant) made with other milk (e.g 1% milk, lactose free milk, almond milk)                            | :cereal_porridge_milk             | 203.5        | :cereal_porridge_milk_other                 | 203.5        | 0%:Milk type taken into account in the updated version                                                                                               |
| Porridge (including instant) made with other milk (e.g 1% milk, lactose free milk, almond milk) and added dried fruit      | :cereal_porridge_milk_driedfruit  | 203.5        | :cereal_porridge_milk_other_driedfruit      | 233.5        | 15%:Milk type taken into account in the updated version + portion size increased to account for dried fruit added after cooking                      |
| Porridge (including instant) made with powdered milk made up                                                               | :cereal_porridge_milk             | 203.5        | :cereal_porridge_milk_powdered              | 203.5        | 0%:Milk type taken into account in the updated version                                                                                               |
| Porridge (including instant) made with powdered milk made up and added dried fruit                                         | :cereal_porridge_milk_driedfruit  | 203.5        | :cereal_porridge_milk_powdered_driedfruit   | 233.5        | 15%:Milk type taken into account in the updated version + portion size increased to account for dried fruit added after cooking                      |
| Porridge (including instant) made with rice, oat, almond or coconut milk                                                   | :cereal_porridge_milk             | 203.5        | :cereal_porridge_milk_riceoatveg            | 203.5        | 0%:Milk type taken into account in the updated version                                                                                               |
| Porridge (including instant) made with rice, oat, almond or coconut milk and added dried fruit                             | :cereal_porridge_milk_driedfruit  | 203.5        | :cereal_porridge_milk_riceoatveg_driedfruit | 233.5        | 15%:Milk type taken into account in the updated version + portion size increased to account for dried fruit added after cooking                      |
| Porridge (including instant) made with semi skimmed milk                                                                   | :cereal_porridge_milk             | 203.5        | :cereal_porridge_milk_semi                  | 203.5        | 0%:Milk type taken into account in the updated version                                                                                               |
| Porridge (including instant) made with semi skimmed milk and added dried fruit                                             | :cereal_porridge_milk_driedfruit  | 203.5        | :cereal_porridge_milk_semi_driedfruit       | 233.5        | 15%:Milk type taken into account in the updated version + portion size increased to account for dried fruit added after cooking                      |
| Porridge (including instant) made with skimmed milk                                                                        | :cereal_porridge_milk             | 203.5        | :cereal_porridge_milk_skimmed               | 203.5        | 0%:Milk type taken into account in the updated version                                                                                               |
| Porridge (including instant) made with skimmed milk and added dried fruit                                                  | :cereal_porridge_milk_driedfruit  | 203.5        | :cereal_porridge_milk_skimmed_driedfruit    | 233.5        | 15%:Milk type taken into account in the updated version + portion size increased to account for dried fruit added after cooking                      |
| Porridge (including instant) made with soya milk with added calcium                                                        | :cereal_porridge_milk             | 203.5        | :cereal_porridge_milk_soya_ca               | 203.5        | 0%:Milk type taken into account in the updated version                                                                                               |
| Porridge (including instant) made with soya milk with added calcium and added dried fruit                                  | :cereal_porridge_milk_driedfruit  | 203.5        | :cereal_porridge_milk_soya_ca_driedfruit    | 233.5        | 15%:Milk type taken into account in the updated version + portion size increased to account for dried fruit added after cooking                      |
| Porridge (including instant) made with soya milk with no added calcium                                                     | :cereal_porridge_milk             | 203.5        | :cereal_porridge_milk_soya_noca             | 203.5        | 0%:Milk type taken into account in the updated version                                                                                               |
| Porridge (including instant) made with soya milk with no added calcium and added dried fruit                               | :cereal_porridge_milk_driedfruit  | 203.5        | :cereal_porridge_milk_soya_noca_driedfruit  | 233.5        | 15%:Milk type taken into account in the updated version + portion size increased to account for dried fruit added after cooking                      |
| Porridge (including instant) made with whole milk                                                                          | :cereal_porridge_milk             | 203.5        | :cereal_porridge_milk_whole                 | 203.5        | 0%:Milk type taken into account in the updated version                                                                                               |
| Porridge (including instant) made with whole milk and added dried fruit                                                    | :cereal_porridge_milk_driedfruit  | 203.5        | :cereal_porridge_milk_whole_driedfruit      | 233.5        | 15%:Milk type taken into account in the updated version + portion size increased to account for dried fruit added after cooking                      |
| Porridge (including instant) made with water                                                                               | :cereal_porridge_water            | 203.5        | :cereal_porridge_water                      | 203.5        | 0%                                                                                                                                                   |
| Porridge (including instant) made with water and added dried fruit                                                         | :cereal_porridge_water_driedfruit | 203.5        | :cereal_porridge_water_driedfruit           | 233.5        | 15%:Portion size increased to account for dried food                                                                                                 |
| Sugar added onto cereal                                                                                                    | :cereal_sugar                     | 6            | :cereal_sugar                               | 6            | 0%                                                                                                                                                   |
| Sweetened cereals e.g Coco Pops, Honey Nut Cornflakes, Ricicles                                                            | :cereal_sweet                     | 38           | :cereal_sweet                               | 38           | 0%                                                                                                                                                   |
| Sweetened cereals e.g Coco Pops, Honey Nut Cornflakes, Ricicles with added dried fruit                                     | :cereal_sweet_driedfruit          | 52           | :cereal_sweet_driedfruit                    | 52           | 0%:Dried fruit added to cereals                                                                                                                      |
| Wholewheat cereals e.g Weetabix, Shredded Wheat, Shreddies                                                                 | :cereal_wwheat                    | 44           | :cereal_wwheat                              | 44           | 0%                                                                                                                                                   |
| Wholewheat cereals e.g Weetabix, Shredded Wheat, Shreddies with added dried fruit                                          | :cereal_wwheat_driedfruit         | 44           | :cereal_wwheat_driedfruit                   | 44           | 0%:Cereals containing dried fruit                                                                                                                    |
| Blue cheese: Stilton, Danish Blue, Roquefort                                                                               | :cheese_blue                      | 35           | :cheese_blue                                | 35           | 0%                                                                                                                                                   |
| Cheesecake                                                                                                                 | :cheesecake                       | 110          | :cheesecake                                 | 110          | 0%                                                                                                                                                   |
| Cheesecake                                                                                                                 |                                   |              | :cheesecake_gf                              | 110          | 0%:Gluten free version added to the updated version (however no gluten free code available at the time so the non-gluten free code was used)         |
| Cottage cheese                                                                                                             | :cheese_cottage                   | 60           | :cheese_cottage                             | 60           | 0%                                                                                                                                                   |
| Feta cheese                                                                                                                | :cheese_feta                      | 40           | :cheese_feta                                | 40           | 0%                                                                                                                                                   |
| Goat's cheese                                                                                                              | :cheese_goat                      | 40           | :cheese_goat                                | 40           | 0%                                                                                                                                                   |
| Hard cheese e.g Cheddar                                                                                                    | :cheese_hard                      | 40           | :cheese_hard                                | 40           | 0%                                                                                                                                                   |
| Low fat hard cheese e.g Cheddar low fat                                                                                    | :cheese_hard_lof                  | 40           | :cheese_hard_lof                            | 40           | 0%                                                                                                                                                   |
| Mozzarella cheese                                                                                                          | :cheese_mozzarella                | 40           | :cheese_mozzarella                          | 40           | 0%                                                                                                                                                   |
| Other cheese e.g Wensleydale, Halloumi                                                                                     | :cheese_other                     | 40           | :cheese_other                               | 40           | 0%:Updated mapping based on free text entered by study participants, e.g. haloumi                                                                    |
| Soft cheese e.g Brie                                                                                                       | :cheese_soft                      | 40           | :cheese_soft                                | 40           | 0%                                                                                                                                                   |
| Spreadable cheese e.g cream cheese, cheese triangles                                                                       | :cheese_spread                    | 15           | :cheese_spread                              | 15           | 0%                                                                                                                                                   |
| Low fat spreadable cheese e.g cream cheese, cheese triangles                                                               | :cheese_spread_lof                | 15           | :cheese_spread_lof                          | 15           | 0%                                                                                                                                                   |
| Chocolate bar e.g Crunchie, Snickers                                                                                       | :choc_bar                         | 50           | :choc_bar                                   | 50           | 0%                                                                                                                                                   |
| Dark chocolate                                                                                                             | :choc_dark                        | 50           | :choc_dark                                  | 50           | 0%                                                                                                                                                   |
| Milk chocolate                                                                                                             | :choc_milk                        | 50           | :choc_milk                                  | 50           | 0%                                                                                                                                                   |
| Chocolate sweets e.g Roses, Milk Tray                                                                                      | :choc_sweets                      | 36           | :choc_sweets                                | 36           | 0%                                                                                                                                                   |
| White chocolate                                                                                                            | :choc_white                       | 50           | :choc_white                                 | 50           | 0%                                                                                                                                                   |
| Milk chocolate or white chocolate coated raisins                                                                           | :choc yog_raisin                  | 25           | :choc yog_raisin                            | 25           | 0%                                                                                                                                                   |
| Chutney or pickle                                                                                                          | :chutney                          | 20           | :chutney                                    | 20           | 0%                                                                                                                                                   |
| Shot of strong coffee for cappuccino                                                                                       | :cof_capp                         | 30           | :cof_capp                                   | 30           | 0%:Shot of strong coffee for cappuccino separated from milk in updated version                                                                       |
| Shot of strong decaffeinated coffee for cappuccino                                                                         | :cof_capp_decaf                   | 30           | :cof_capp_decaf                             | 30           | 0%:Shot of strong coffee for cappuccino separated from milk in updated version - decaffeinated food code added                                       |
| Milk in cappuccino: cholesterol lowering                                                                                   | :cof_capp_other                   | 190          | :cof_capp_milk_chol                         | 160          | 0%:Milk type taken into account in the updated version; portion size only for milk (30ml shot of coffee in separate food item); sum weight no change |
| Milk in cappuccino: milk (cow's) unspecified (e.g semi skimmed, skimmed, 1% milk)                                          | :cof_capp_other                   | 190          | :cof_capp_milk_dontknow                     | 160          | 0%:Milk type taken into account in the updated version; portion size only for milk (30ml shot of coffee in separate food item); sum weight no change |
| Milk in cappuccino: goat's or sheep's milk                                                                                 | :cof_capp_other                   | 190          | :cof_capp_milk_goatsheep                    | 160          | 0%:Milk type taken into account in the updated version; portion size only for milk (30ml shot of coffee in separate food item); sum weight no change |
| Milk in cappuccino: other milk (e.g 1% milk, lactose free milk, almond milk)                                               | :cof_capp_other                   | 190          | :cof_capp_milk_other                        | 160          | 0%:Milk type taken into account in the updated version; portion size only for milk (30ml shot of coffee in separate food item); sum weight no change |
| Milk in cappuccino: powdered milk made up                                                                                  | :cof_capp_other                   | 190          | :cof_capp_milk_powdered                     | 160          | 0%:Milk type taken into account in the updated version; portion size only for milk (30ml shot of coffee in separate food item); sum weight no change |
| Milk in cappuccino: rice, oat, almond or coconut milk                                                                      | :cof_capp_other                   | 190          | :cof_capp_milk_riceoatveg                   | 160          | 0%:Milk type taken into account in the updated version; portion size only for milk (30ml shot of coffee in separate food item); sum weight no change |
| Milk in cappuccino: semi skimmed milk                                                                                      | :cof_capp_semi                    | 190          | :cof_capp_milk_semi                         | 160          | 0%:Milk type taken into account in the updated version; portion size only for milk (30ml shot of coffee in separate food item); sum weight no change |
| Milk in cappuccino: skimmed milk                                                                                           | :cof_capp_skimmed                 | 190          | :cof_capp_milk_skimmed                      | 160          | 0%:Milk type taken into account in the updated version; portion size only for milk (30ml shot of coffee in separate food item); sum weight no change |
| Milk in cappuccino: soya milk with added calcium                                                                           | :cof_capp_other                   | 190          | :cof_capp_milk_soya_ca                      | 160          | 0%:Milk type taken into account in the updated version; portion size only for milk (30ml shot of coffee in separate food item); sum weight no change |
| Milk in cappuccino: soya milk with no added calcium                                                                        | :cof_capp_other                   | 190          | :cof_capp_milk_soya_noca                    | 160          | 0%:Milk type taken into account in the updated version; portion size only for milk (30ml shot of coffee in separate food item); sum weight no change |
| Milk in cappuccino: whole milk                                                                                             | :cof_capp_whole                   | 190          | :cof_capp_milk_whole                        | 160          | 0%:Milk type taken into account in the updated version; portion size only for milk (30ml shot of coffee in separate food item); sum weight no change |
| Shot of strong coffee for espresso                                                                                         | :cof_espresso                     | 30           | :cof_espresso                               | 30           | 0%                                                                                                                                                   |
| Shot of strong decaffeinated coffee for espresso                                                                           | :cof_espresso_decaf               | 30           | :cof_espresso_decaf                         | 30           | 0%:Decaffeinated food code added                                                                                                                     |
| Filter coffee                                                                                                              | :cof_filter                       | 190          | :cof_filter                                 | 190          | 0%                                                                                                                                                   |
| Filter coffee decaffeinated                                                                                                | :cof_filter_decaf                 | 190          | :cof_filter_decaf                           | 190          | 0%:Decaffeinated food code added                                                                                                                     |
| Instant coffee                                                                                                             | :cof_instant                      | 190          | :cof_instant                                | 190          | 0%                                                                                                                                                   |
| Instant coffee decaffeinated                                                                                               | :cof_instant_decaf                | 190          | :cof_instant_decaf                          | 190          | 0%:Decaffeinated food code added                                                                                                                     |
| Shot of strong coffee for latte                                                                                            | :cof_latte                        | 30           | :cof_latte                                  | 30           | 0%:Shot of strong coffee for cappuccino separated from milk in updated version                                                                       |
| Shot of strong decaffeinated coffee for latte                                                                              | :cof_latte_decaf                  | 30           | :cof_latte_decaf                            | 30           | 0%:Shot of strong coffee for cappuccino separated from milk in updated version - decaffeinated food code added                                       |
| Milk in latte: cholesterol lowering                                                                                        | :cof_latte_decaf_other            | 190          | :cof_latte_milk_chol                        | 160          | 0%:Milk type taken into account in the updated version; portion size only for milk (30ml shot of coffee in separate food item); sum weight no change |
| Milk in latte: milk (cow's) unspecified (e.g semi skimmed, skimmed, 1% milk)                                               | :cof_latte_decaf_other            | 190          | :cof_latte_milk_dontknow                    | 160          | 0%:Milk type taken into account in the updated version; portion size only for milk (30ml shot of coffee in separate food item); sum weight no change |
| Milk in latte: goat's or sheep's milk                                                                                      | :cof_latte_decaf_other            | 190          | :cof_latte_milk_goatsheep                   | 160          | 0%:Milk type taken into account in the updated version; portion size only for milk (30ml shot of coffee in separate food item); sum weight no change |
| Milk in latte: other milk (e.g 1% milk, lactose free milk, almond milk)                                                    | :cof_latte_decaf_other            | 190          | :cof_latte_milk_other                       | 160          | 0%:Milk type taken into account in the updated version; portion size only for milk (30ml shot of coffee in separate food item); sum weight no change |
| Milk in latte: powdered milk made up                                                                                       | :cof_latte_decaf_other            | 190          | :cof_latte_milk_powdered                    | 160          | 0%:Milk type taken into account in the updated version; portion size only for milk (30ml shot of coffee in separate food item); sum weight no change |
| Milk in latte: rice, oat, almond or coconut milk                                                                           | :cof_latte_decaf_other            | 190          | :cof_latte_milk_riceoatveg                  | 160          | 0%:Milk type taken into account in the updated version; portion size only for milk (30ml shot of coffee in separate food item); sum weight no change |
| Milk in latte: semi skimmed milk                                                                                           | :cof_latte_decaf_semi             | 190          | :cof_latte_milk_semi                        | 160          | 0%:Milk type taken into account in the updated version; portion size only for milk (30ml shot of coffee in separate food item); sum weight no change |
| Milk in latte: skimmed milk                                                                                                | :cof_latte_decaf_skimmed          | 190          | :cof_latte_milk_skimmed                     | 160          | 0%:Milk type taken into account in the updated version; portion size only for milk (30ml shot of coffee in separate food item); sum weight no change |
| Milk in latte: soya milk with added calcium                                                                                | :cof_latte_decaf_other            | 190          | :cof_latte_milk_soya_ca                     | 160          | 0%:Milk type taken into account in the updated version; portion size only for milk (30ml shot of coffee in separate food item); sum weight no change |
| Milk in latte: soya milk with no added calcium                                                                             | :cof_latte_decaf_other            | 190          | :cof_latte_milk_soya_noca                   | 160          | 0%:Milk type taken into account in the updated version; portion size only for milk (30ml shot of coffee in separate food item); sum weight no change |
| Milk in latte: whole milk                                                                                                  | :cof_latte_decaf_whole            | 190          | :cof_latte_milk_whole                       | 160          | 0%:Milk type taken into account in the updated version; portion size only for milk (30ml shot of coffee in separate food item); sum weight no change |
| Other unspecified coffee                                                                                                   | :cof_other                        | 190          | :cof_other                                  | 190          | 0%:Updated mapping based on free text entered by study participants, e.g. mixture of instant and filter coffee                                       |
| Other unspecified coffee decaffeinated                                                                                     | :cof_other_decaf                  | 190          | :cof_other_decaf                            | 190          | 0%:Decaffeinated food code added                                                                                                                     |
| Sugar added to coffee                                                                                                      | :cof_sugar                        | 6            | :cof_sugar                                  | 6            | 0%                                                                                                                                                   |
| Cream e.g. single, double, sour, crème fraîche                                                                             | :cream                            | 30           | :cream                                      | 30           | 0%                                                                                                                                                   |
| Croissant                                                                                                                  | :croissant                        | 60           | :croissant                                  | 60           | 0%                                                                                                                                                   |
| Crumble topping                                                                                                            | :crumble                          | 70           | :crumble                                    | 70           | 0%                                                                                                                                                   |
| Danish pastries                                                                                                            | :danish_pastry                    | 110          | :danish_pastry                              | 110          | 0%                                                                                                                                                   |
| Milk based desserts other e.g mousse, tiramisu, crème caramel                                                              | :dessert_milkbased                | 60           | :dessert_milkbased                          | 60           | 0%                                                                                                                                                   |
| Milk based desserts e.g custard, rice pudding, blancmange                                                                  | :dessert_milkpuds                 | 200          | :dessert_milkpuds                           | 200          | 0%                                                                                                                                                   |
| Other desserts e.g apple pie, stewed fruit, trifle                                                                         | :dessert_other                    | 60           | :dessert_other                              | 60           | 0%                                                                                                                                                   |
| Soya ice cream, soya yogurt, other soya dessert                                                                            | :dessert_soya                     | 125          | :dessert_soya                               | 125          | 0%                                                                                                                                                   |
| Double crust pie or pasty                                                                                                  | :double_crust                     | 60           | :double_crust                               | 60           | 0%                                                                                                                                                   |
| Doughnut                                                                                                                   | :doughnut                         | 60           | :doughnut                                   | 60           | 0%                                                                                                                                                   |
| Low sugar/low fat hot chocolate drink                                                                                      | :drink_diethothc                  | 260          | :drink_diethothc                            | 260          | 0%                                                                                                                                                   |
| Fizzy/carbonated soft drinks                                                                                               | :drink_fizzy                      | 330          | :drink_fizzy                                | 330          | 0%                                                                                                                                                   |
| Grapefruit juice                                                                                                           | :drink_grapefruit                 | 250          | :drink_grapefruit                           | 250          | 0%:Replaced concentrated juice with 'as served'                                                                                                      |
| Hot chocolate: chocolate powder and water                                                                                  | :drink_hotchoc                    | 143          | :drink_hotchoc                              | 143          | 0%:Chocolate powder and water in updated version (milk separate for non-instant version of hot chocolate)                                            |
| Milk in hot chocolate: cholesterol lowering                                                                                | :drink_hotchoc_other              | 260          | :drink_hotchoc_milk_chol                    | 117          | 0%:Milk type taken into account in the updated version + portion size now only for milk (143ml of chocolate in separate food item)                   |
| Milk in hot chocolate: milk (cow's) unspecified (e.g semi skimmed, skimmed, 1% milk)                                       | :drink_hotchoc_other              | 260          | :drink_hotchoc_milk_dontknow                | 117          | 0%:Milk type taken into account in the updated version + portion size now only for milk (143ml of chocolate in separate food item)                   |
| Milk in hot chocolate: goat's or sheep's milk                                                                              | :drink_hotchoc_other              | 260          | :drink_hotchoc_milk_goatsheep               | 117          | 0%:Milk type taken into account in the updated version + portion size now only for milk (143ml of chocolate in separate food item)                   |
| Milk in hot chocolate: other milk (e.g 1% milk, lactose free milk, almond milk)                                            | :drink_hotchoc_other              | 260          | :drink_hotchoc_milk_other                   | 117          | 0%:Milk type taken into account in the updated version + portion size now only for milk (143ml of chocolate in separate food item)                   |
| Milk in hot chocolate: powdered milk made up                                                                               | :drink_hotchoc_other              | 260          | :drink_hotchoc_milk_powdered                | 117          | 0%:Milk type taken into account in the updated version + portion size now only for milk (143ml of chocolate in separate food item)                   |
| Milk in hot chocolate: rice, oat, almond or coconut milk                                                                   | :drink_hotchoc_other              | 260          | :drink_hotchoc_milk_riceoatveg              | 117          | 0%:Milk type taken into account in the updated version + portion size now only for milk (143ml of chocolate in separate food item)                   |
| Milk in hot chocolate: semi skimmed milk                                                                                   | :drink_hotchoc_semi               | 260          | :drink_hotchoc_milk_semi                    | 117          | 0%:Milk type taken into account in the updated version + portion size now only for milk (143ml of chocolate in separate food item)                   |
| Milk in hot chocolate: skimmed milk                                                                                        | :drink_hotchoc_skimmed            | 260          | :drink_hotchoc_milk_skimmed                 | 117          | 0%:Milk type taken into account in the updated version + portion size now only for milk (143ml of chocolate in separate food item)                   |
| Milk in hot chocolate: soya milk with added calcium                                                                        | :drink_hotchoc_other              | 260          | :drink_hotchoc_milk_soya_ca                 | 117          | 0%:Milk type taken into account in the updated version + portion size now only for milk (143ml of chocolate in separate food item)                   |
| Milk in hot chocolate: soya milk with no added calcium                                                                     | :drink_hotchoc_other              | 260          | :drink_hotchoc_milk_soya_noca               | 117          | 0%:Milk type taken into account in the updated version + portion size now only for milk (143ml of chocolate in separate food item)                   |
| Milk in hot chocolate: whole milk                                                                                          | :drink_hotchoc_whole              | 260          | :drink_hotchoc_milk_whole                   | 117          | 0%:Milk type taken into account in the updated version + portion size now only for milk (143ml of chocolate in separate food item)                   |
| Low calorie/low sugar drink, still or fizzy                                                                                | :drink_lowcal                     | 330          | :drink_lowcal                               | 330          | 0%                                                                                                                                                   |

|                                                                                                                                         | McCance and Widdowson's |              | Nutrient databank + other changes |              |               |
|-----------------------------------------------------------------------------------------------------------------------------------------|-------------------------|--------------|-----------------------------------|--------------|---------------|
| Variable description                                                                                                                    | Food item               | Portion size | Food item                         | Portion size | Portion diff% |
| Description of differences with previous version                                                                                        |                         |              |                                   |              |               |
| Milk based drink e.g Yogurt drinks, flavoured milk or milkshakes                                                                        | :drink_milkbased        | 250          | :drink_milkbased                  | 250          | 0%            |
| Orange juice                                                                                                                            | :drink_orange           | 250          | :drink_orange                     | 250          | 0%            |
| Drink other e.g Barley cup, other mixed fruit drink                                                                                     | :drink_other            | 260          | :drink_other                      | 260          | 0%            |
| Pure juice other e.g apple, pineapple, tomato, cranberry                                                                                | :drink_purejuice        | 250          | :drink_purejuice                  | 250          | 0%            |
| Fruit squash or cordial                                                                                                                 | :drink_squash           | 250          | :drink_squash                     | 250          | 0%            |
| Water (still/sparkling)                                                                                                                 | :drink_water            | 250          | :drink_water                      | 250          | 0%            |
| Drizzle of oil                                                                                                                          | :drizzle_oil            | 10           | :drizzle_oil                      | 10           | 0%            |
| Omelette or scrambled egg                                                                                                               | :egg_omelet             | 120          | :egg_omelet                       | 120          | 0%            |
| Other egg dish e.g quiche                                                                                                               | :egg_other              | 75           | :egg_other                        | 75           | 0%            |
| Scotch egg                                                                                                                              | :egg_scoth              | 120          | :egg_scoth                        | 120          | 0%            |
| Egg mayonnaise                                                                                                                          | :egg_swich              | 120          | :egg_swich                        | 120          | 0%            |
| Eggs boiled, poached, fried                                                                                                             | :egg_whole              | 50           | :egg_whole                        | 50           | 0%            |
| White fish in batter                                                                                                                    | :fish_battered          | 190          | :fish_battered                    | 150          | -21%          |
| White fish in breadcrumbs                                                                                                               | :fish_breaded           | 56           | :fish_breaded                     | 100          | 79%           |
| Lobster or crab                                                                                                                         | :fish_lobcrab           | 85           | :fish_lobcrab                     | 85           | 0%            |
| Oily fish e.g salmon, mackerel, herring                                                                                                 | :fish_oily              | 100          | :fish_oily                        | 100          | 0%            |
| Other fish e.g trout, squid, fish pate                                                                                                  | :fish_other             | 100          | :fish_other                       | 100          | 0%            |
| Prawns                                                                                                                                  | :fish_prawns            | 60           | :fish_prawns                      | 60           | 0%            |
| Shell fish e.g scallops, muscles                                                                                                        | :fish_shell             | 40           | :fish_shell                       | 40           | 0%            |
| Tinned tuna                                                                                                                             | :fish_tinnedtuna        | 92           | :fish_tinnedtuna                  | 92           | 0%            |
| White fish e.g cod, haddock                                                                                                             | :fish_white             | 120          | :fish_white                       | 120          | 0%            |
| Apple                                                                                                                                   | :fruit_apple            | 100          | :fruit_apple                      | 112          | 12%           |
| Banana                                                                                                                                  | :fruit_banana           | 100          | :fruit_banana                     | 100          | 0%            |
| Berries e.g strawberry, raspberry, blueberry, blackberry                                                                                | :fruit_berry            | 40           | :fruit_berry                      | 40           | 0%            |
| Fruitcake iced or plain                                                                                                                 | :fruitcake              | 70           | :fruitcake                        | 70           | 0%            |
| Fruitcake iced or plain                                                                                                                 |                         |              | :fruitcake_gf                     | 70           | -             |
| Cherries                                                                                                                                | :fruit_cherry           | 24           | :fruit_cherry                     | 34           | 42%           |
| Dried fruit e.g raisins, dates, dried figs, dried apricots                                                                              | :fruit_dried            | 60           | :fruit_dried                      | 60           | 0%            |
| Grapefruit                                                                                                                              | :fruit_grapefruit       | 160          | :fruit_grapefruit                 | 148          | -8%           |
| Grapes: red, green, black                                                                                                               | :fruit_grapes           | 100          | :fruit_grapes                     | 100          | 0%            |
| Mango                                                                                                                                   | :fruit_mango            | 100          | :fruit_mango                      | 113          | 13%           |
| Melon: honeydew, cantaloupe, watermelon                                                                                                 | :fruit_melon            | 180          | :fruit_melon                      | 180          | 0%            |
| Fresh or tinned fruit salad with or without juice/syrup                                                                                 | :fruit_mixed            | 105          | :fruit_mixed                      | 105          | 0%            |
| Orange                                                                                                                                  | :fruit_orange           | 120          | :fruit_orange                     | 120          | 0%            |
| Other fruit e.g kiwi, papaya, pomegranate, apricot, fig                                                                                 | :fruit_other            | 60           | :fruit_other                      | 60           | 0%            |
| Peach                                                                                                                                   | :fruit_peach            | 150          | :fruit_peach                      | 130          | -13%          |
| Pear                                                                                                                                    | :fruit_pear             | 120          | :fruit_pear                       | 160          | 33%           |
| Pineapple                                                                                                                               | :fruit_pineapple        | 80           | :fruit_pineapple                  | 80           | 0%            |
| Plum                                                                                                                                    | :fruit_plum             | 55           | :fruit_plum                       | 55           | 0%            |
| Prunes                                                                                                                                  | :fruit_prunes           | 60           | :fruit_prunes                     | 60           | 0%            |
| Tangerine, clementine, mandarin                                                                                                         | :fruit_satsuma          | 70           | :fruit_satsuma                    | 70           | 0%            |
| Stewed fruit                                                                                                                            | :fruit_stewed           | 140          | :fruit_stewed                     | 140          | 0%            |
| Cous cous                                                                                                                               | :grains_couscous        | 150          | :grains_couscous                  | 150          | 0%            |
| Other grains e.g barley, bulgarwheat, quinoa                                                                                            | :grains_other           | 157          | :grains_other                     | 157          | 0%            |
| Guacamole                                                                                                                               | :guacamole              | 26           | :guacamole                        | 26           | 0%            |
| Hummus                                                                                                                                  | :hummus                 | 26           | :hummus                           | 26           | 0%            |
| Ice-cream: dairy hard scoop, non dairy soft scoop, non dairy choc ice                                                                   | :icecream               | 120          | :icecream                         | 120          | 0%            |
| Indian snack e.g pakora, onion bahji, samosa                                                                                            | :indian_snack           | 40           | :indian_snack                     | 40           | 0%            |
| Jam, marmalade, honey, golden syrup                                                                                                     | :jam_honey              | 18           | :jam_honey                        | 18           | 0%            |
| Mayonnaise                                                                                                                              | :mayo                   | 30           | :mayo                             | 30           | 0%            |
| Low fat mayonnaise                                                                                                                      | :mayo_lowfat            | 30           | :mayo_lowfat                      | 30           | 0%            |
| Bacon rasher unsmoked lean/fat trimmed                                                                                                  | :meat_bacon_nofat       | 46           | :meat_bacon_nofat                 | 46           | 0%            |
| Bacon rasher untrimmed/with fat                                                                                                         | :meat_bacon_withfat     | 46           | :meat_bacon_withfat               | 46           | 0%            |
| Beef lean only: roast, steak, burger, minced, curry                                                                                     | :meat_beef_nofat        | 120          | :meat_beef_nofat                  | 120          | 0%            |
| Beef with fat: roast, steak, burger, minced, curry                                                                                      | :meat_beef_withfat      | 120          | :meat_beef_withfat                | 120          | 0%            |
| Ham unspecified                                                                                                                         | :meat_ham_nofat         | 23           | :meat_ham_nofat                   | 23           | 0%            |
| Parma ham, salami, pastrami                                                                                                             | :meat_ham_withfat       | 23           | :meat_ham_withfat                 | 23           | 0%            |
| Lamb lean only: chops, roast, stewed, burger                                                                                            | :meat_lamb_nofat        | 120          | :meat_lamb_nofat                  | 120          | 0%            |
| Lamb with fat: chops, roast, stewed, burger                                                                                             | :meat_lamb_withfat      | 120          | :meat_lamb_withfat                | 120          | 0%            |
| Pig's or lambs liver or liver pate                                                                                                      | :meat_liverpate         | 70           | :meat_liverpate                   | 70           | 0%            |
| Duck, venison, goose                                                                                                                    | :meat_other             | 100          | :meat_other                       | 100          | 0%            |
| Pork lean only: roast, chops, steak, diced (e.g sweet and sour)                                                                         | :meat_pork_nofat        | 120          | :meat_pork_nofat                  | 120          | 0%            |
| Pork with fat: roast, chops, steak, diced (e.g sweet and sour)                                                                          | :meat_pork_withfat      | 120          | :meat_pork_withfat                | 120          | 0%            |
| Sausages, pork or beef                                                                                                                  | :meat_sausage           | 30           | :meat_sausage                     | 30           | 0%            |
| Milk on your cereal: cholesterol lowering milk                                                                                          | :milk_chol_cereal       | 100          | :milk_chol_cereal                 | 100          | 0%            |
| Milk (splash) in instant or filter coffee or coffee infusion weak/strong: cholesterol lowering milk                                     | :milk_chol_coffee       | 25           | :milk_chol_coffee                 | 35           | 40%           |
| Milk in a glass: cholesterol lowering milk                                                                                              | :milk_chol_glass        | 259          | :milk_chol_glass                  | 259          | 0%            |
| Milk (splash) in tea: cholesterol lowering milk                                                                                         | :milk_chol_tea          | 35           | :milk_chol_tea                    | 35           | 0%            |
| Milk on your cereal: milk (cow's) unspecified (e.g semi skimmed, skimmed, 1% milk)                                                      | :milk_dontknow_cereal   | 100          | :milk_dontknow_cereal             | 100          | 0%            |
| Milk (splash) in instant or filter coffee or coffee infusion weak/strong: milk (cow's) unspecified (e.g semi skimmed, skimmed, 1% milk) | :milk_dontknow_coffee   | 25           | :milk_dontknow_coffee             | 35           | 40%           |
| Milk in a glass: milk (cow's) unspecified (e.g semi skimmed, skimmed, 1% milk)                                                          | :milk_dontknow_glass    | 259          | :milk_dontknow_glass              | 259          | 0%            |
| Milk (splash) in tea: milk (cow's) unspecified (e.g semi skimmed, skimmed, 1% milk)                                                     | :milk_dontknow_tea      | 35           | :milk_dontknow_tea                | 35           | 0%            |
| Milk on your cereal: goat's or sheep's milk                                                                                             | :milk_goatsheep_cereal  | 100          | :milk_goatsheep_cereal            | 100          | 0%            |
| Milk (splash) in instant or filter coffee or coffee infusion weak/strong: goat's or sheep's milk                                        | :milk_goatsheep_coffee  | 35           | :milk_goatsheep_coffee            | 35           | 0%            |
| Milk in a glass: goat's or sheep's milk                                                                                                 | :milk_goatsheep_glass   | 259          | :milk_goatsheep_glass             | 259          | 0%            |
| Milk (splash) in tea: goat's or sheep's milk                                                                                            | :milk_goatsheep_tea     | 35           | :milk_goatsheep_tea               | 35           | 0%            |
| Milk on your cereal: other milk (e.g 1% milk, lactose free milk, almond milk)                                                           | :milk_other_cereal      | 100          | :milk_other_cereal                | 100          | 0%            |
| Milk (splash) in instant or filter coffee or coffee infusion weak/strong: other milk (e.g 1% milk, lactose free milk, almond milk)      | :milk_other_coffee      | 25           | :milk_other_coffee                | 35           | 40%           |
| Milk in a glass: other milk (e.g 1% milk, lactose free milk, almond milk)                                                               | :milk_other_glass       | 259          | :milk_other_glass                 | 259          | 0%            |
| Milk (splash) in tea: other milk (e.g 1% milk, lactose free milk, almond milk)                                                          | :milk_other_tea         | 35           | :milk_other_tea                   | 35           | 0%            |
| Milk on your cereal: powdered milk made up                                                                                              | :milk_powdered_cereal   | 10           | :milk_powdered_cereal             | 100          | 900%          |
| Milk (splash) in instant or filter coffee or coffee infusion weak/strong: powdered milk made up                                         | :milk_powdered_coffee   | 3            | :milk_powdered_coffee             | 4.5          | 50%           |
| Milk in a glass: powdered milk made up                                                                                                  | :milk_powdered_glass    | 24           | :milk_powdered_glass              | 259          | 979%          |
| Milk (splash) in tea: powdered milk made up                                                                                             | :milk_powdered_tea      | 3            | :milk_powdered_tea                | 3            | 0%            |
| Milk on your cereal: rice, oat, almond or coconut milk                                                                                  | :milk_riceoatveg_cereal | 100          | :milk_riceoatveg_cereal           | 100          | 0%            |
| Milk (splash) in instant or filter coffee or coffee infusion weak/strong: rice, oat, almond or coconut milk                             | :milk_riceoatveg_coffee | 35           | :milk_riceoatveg_coffee           | 35           | 0%            |
| Milk in a glass: rice, oat, almond or coconut milk                                                                                      | :milk_riceoatveg_glass  | 259          | :milk_riceoatveg_glass            | 259          | 0%            |
| Milk (splash) in tea: rice, oat, almond or coconut milk                                                                                 | :milk_riceoatveg_tea    | 35           | :milk_riceoatveg_tea              | 35           | 0%            |
| Milk on your cereal: semi skimmed milk                                                                                                  | :milk_semi_cereal       | 100          | :milk_semi_cereal                 | 100          | 0%            |
| Milk (splash) in instant or filter coffee or coffee infusion weak/strong: semi skimmed milk                                             | :milk_semi_coffee       | 25           | :milk_semi_coffee                 | 35           | 40%           |
| Milk in a glass: semi skimmed milk                                                                                                      | :milk_semi_glass        | 259          | :milk_semi_glass                  | 259          | 0%            |
| Milk (splash) in tea: semi skimmed milk                                                                                                 | :milk_semi_tea          | 35           | :milk_semi_tea                    | 35           | 0%            |
| Milk on your cereal: skimmed milk                                                                                                       | :milk_skimmed_cereal    | 100          | :milk_skimmed_cereal              | 100          | 0%            |
| Milk (splash) in instant or filter coffee or coffee infusion weak/strong: skimmed milk                                                  | :milk_skimmed_coffee    | 25           | :milk_skimmed_coffee              | 35           | 40%           |
| Milk in a glass: skimmed milk                                                                                                           | :milk_skimmed_glass     | 259          | :milk_skimmed_glass               | 259          | 0%            |
| Milk (splash) in tea: skimmed milk                                                                                                      | :milk_skimmed_tea       | 35           | :milk_skimmed_tea                 | 35           | 0%            |
| Milk on your cereal: soya milk with added calcium                                                                                       | :milk_soya_ca_cereal    | 100          | :milk_soya_ca_cereal              | 100          | 0%            |
| Milk (splash) in instant or filter coffee or coffee infusion weak/strong: soya milk with added calcium                                  | :milk_soya_ca_coffee    | 35           | :milk_soya_ca_coffee              | 35           | 0%            |
| Milk in a glass: soya milk with added calcium                                                                                           | :milk_soya_ca_glass     | 259          | :milk_soya_ca_glass               | 259          | 0%            |
| Milk (splash) in tea: soya milk with added calcium                                                                                      | :milk_soya_ca_tea       | 35           | :milk_soya_ca_tea                 | 35           | 0%            |
| Milk on your cereal: soya milk with no added calcium                                                                                    | :milk_soya_noca_cereal  | 100          | :milk_soya_noca_cereal            | 100          | 0%            |
| Milk (splash) in instant or filter coffee or coffee infusion weak/strong: soya milk with no added calcium                               | :milk_soya_noca_coffee  | 35           | :milk_soya_noca_coffee            | 35           | 0%            |
| Milk in a glass: soya milk with no added calcium                                                                                        | :milk_soya_noca_glass   | 259          | :milk_soya_noca_glass             | 259          | 0%            |
| Milk (splash) in tea: soya milk with no added calcium                                                                                   | :milk_soya_noca_tea     | 35           | :milk_soya_noca_tea               | 35           | 0%            |
| Milk on your cereal: whole milk                                                                                                         | :milk_whole_cereal      | 100          | :milk_whole_cereal                | 100          | 0%            |
| Milk (splash) in instant or filter coffee or coffee infusion weak/strong: whole milk                                                    | :milk_whole_coffee      | 25           | :milk_whole_coffee                | 35           | 40%           |
| Milk in a glass: whole milk                                                                                                             | :milk_whole_glass       | 259          | :milk_whole_glass                 | 259          | 0%            |
| Milk (splash) in tea: whole milk                                                                                                        | :milk_whole_tea         | 35           | :milk_whole_tea                   | 35           | 0%            |
| Oatcakes                                                                                                                                | :oatcakes               | 13           | :oatcakes                         | 13           | 0%            |



|                                                                                                                                              | McCance and Widdowson's                     | Portion: | Nutrient databank + other changes             | Portion: | Portion:                                                                          |
|----------------------------------------------------------------------------------------------------------------------------------------------|---------------------------------------------|----------|-----------------------------------------------|----------|-----------------------------------------------------------------------------------|
| Variable description                                                                                                                         | Food item                                   | size:    | Food item                                     | size:    | diff%:Description of differences with previous version                            |
| Fat that is spread (medium amount) onto oatcakes: ticked butter but not specified amount of % fat                                            | :oatcakes_spread_butter_dunno_med           |          | 7:oatcakes_spread_butter_dunno_med            | 2.5:     | -64%:25% of weight on a slice; food composition as butter and spreadable butter   |
| Fat that is spread (thick amount) onto oatcakes: ticked butter but not specified amount of % fat                                             | :oatcakes_spread_butter_dunno_thick         |          | 10:oatcakes_spread_butter_dunno_thick         | 3:       | -70%:25% of weight on a slice; food composition as butter and spreadable butter   |
| Fat that is spread (thin amount) onto oatcakes: ticked butter but not specified amount of % fat                                              | :oatcakes_spread_butter_dunno_thin          |          | 5:oatcakes_spread_butter_dunno_thin           | 1.75:    | -65%:25% of weight on a slice; food composition as butter and spreadable butter   |
| Fat that is spread (medium amount) onto oatcakes: ticked butter, normal amount of % fat                                                      | :oatcakes_spread_butter_fat_med             |          | 7:oatcakes_spread_butter_fat_med              | 2.5:     | -64%:25% of weight on a slice                                                     |
| Fat that is spread (thick amount) onto oatcakes: ticked butter, normal amount of % fat                                                       | :oatcakes_spread_butter_fat_thick           |          | 10:oatcakes_spread_butter_fat_thick           | 3:       | -70%:25% of weight on a slice                                                     |
| Fat that is spread (thin amount) onto oatcakes: ticked butter, normal amount of % fat                                                        | :oatcakes_spread_butter_fat_thin            |          | 5:oatcakes_spread_butter_fat_thin             | 1.75:    | -65%:25% of weight on a slice                                                     |
| Fat that is spread (medium amount) onto oatcakes: ticked butter, low fat                                                                     | :oatcakes_spread_butter_lowfat_med          |          | 7:oatcakes_spread_butter_lowfat_med           | 2.5:     | -64%:25% of weight on a slice                                                     |
| Fat that is spread (thick amount) onto oatcakes: ticked butter, low fat                                                                      | :oatcakes_spread_butter_lowfat_thick        |          | 10:oatcakes_spread_butter_lowfat_thick        | 3:       | -70%:25% of weight on a slice                                                     |
| Fat that is spread (thin amount) onto oatcakes: ticked butter, low fat                                                                       | :oatcakes_spread_butter_lowfat_thin         |          | 5:oatcakes_spread_butter_lowfat_thin          | 1.75:    | -65%:25% of weight on a slice                                                     |
| Fat that is spread (medium amount) onto oatcakes: ticked spreadable butter with normal amount of % fat                                       | :oatcakes_spread_butter_spread_fat_med      |          | 7:oatcakes_spread_butter_spread_fat_med       | 2.5:     | -64%:25% of weight on a slice                                                     |
| Fat that is spread (thick amount) onto oatcakes: ticked spreadable butter with normal amount of % fat                                        | :oatcakes_spread_butter_spread_fat_thick    |          | 10:oatcakes_spread_butter_spread_fat_thick    | 3:       | -70%:25% of weight on a slice                                                     |
| Fat that is spread (thin amount) onto oatcakes: ticked spreadable butter with normal amount of % fat                                         | :oatcakes_spread_butter_spread_fat_thin     |          | 5:oatcakes_spread_butter_spread_fat_thin      | 1.75:    | -65%:25% of weight on a slice                                                     |
| Fat that is spread (medium amount) onto oatcakes: ticked spreadable butter, low fat                                                          | :oatcakes_spread_butter_spread_lowfat_med   |          | 7:oatcakes_spread_butter_spread_lowfat_med    | 2.5:     | -64%:25% of weight on a slice                                                     |
| Fat that is spread (thick amount) onto oatcakes: ticked spreadable butter, low fat                                                           | :oatcakes_spread_butter_spread_lowfat_thick |          | 10:oatcakes_spread_butter_spread_lowfat_thick | 3:       | -70%:25% of weight on a slice                                                     |
| Fat that is spread (thin amount) onto oatcakes: ticked spreadable butter, low fat                                                            | :oatcakes_spread_butter_spread_lowfat_thin  |          | 5:oatcakes_spread_butter_spread_lowfat_thin   | 1.75:    | -65%:25% of weight on a slice                                                     |
| Fat that is spread (medium amount) onto oatcakes: ticked dairy spread which is also cholesterol lowering e.g Benecol Buttery                 | :oatcakes_spread_dairy_chol_med             |          | 5:oatcakes_spread_dairy_chol_med              | 1.75:    | -65%:25% of weight on a slice                                                     |
| Fat that is spread (thick amount) onto oatcakes: ticked dairy spread which is also cholesterol lowering e.g Benecol Buttery                  | :oatcakes_spread_dairy_chol_thick           |          | 7:oatcakes_spread_dairy_chol_thick            | 2.5:     | -64%:25% of weight on a slice                                                     |
| Fat that is spread (thin amount) onto oatcakes: ticked dairy spread which is also cholesterol lowering e.g Benecol Buttery                   | :oatcakes_spread_dairy_chol_thin            |          | 3:oatcakes_spread_dairy_chol_thin             | 1.25:    | -58%:25% of weight on a slice                                                     |
| Fat that is spread (medium amount) onto oatcakes: ticked dairy spread but not specified amount of % fat                                      | :oatcakes_spread_dairy_dunno_med            |          | 5:oatcakes_spread_dairy_dunno_med             | 1.75:    | -65%:25% of weight on a slice; food composition as low fat and reduced fat        |
| Fat that is spread (thick amount) onto oatcakes: ticked dairy spread but not specified amount of % fat                                       | :oatcakes_spread_dairy_dunno_thick          |          | 7:oatcakes_spread_dairy_dunno_thick           | 2.5:     | -64%:25% of weight on a slice; food composition as butter and reduced fat         |
| Fat that is spread (thin amount) onto oatcakes: ticked dairy spread but not specified amount of % fat                                        | :oatcakes_spread_dairy_dunno_thin           |          | 3:oatcakes_spread_dairy_dunno_thin            | 1.25:    | -58%:25% of weight on a slice; food composition as low fat and reduced fat        |
| Fat that is spread (medium amount) onto oatcakes: ticked dairy spread with normal amount of % fat                                            | :oatcakes_spread_dairy_fat_med              |          | 5:oatcakes_spread_dairy_fat_med               | 1.75:    | -65%:25% of weight on a slice; normal fat is taken as reduced fat (up to 62% fat) |
| Fat that is spread (thick amount) onto oatcakes: ticked dairy spread with normal amount of % fat                                             | :oatcakes_spread_dairy_fat_thick            |          | 7:oatcakes_spread_dairy_fat_thick             | 2.5:     | -64%:25% of weight on a slice; normal fat is taken as reduced fat (up to 62% fat) |
| Fat that is spread (thin amount) onto oatcakes: ticked dairy spread with normal amount of % fat                                              | :oatcakes_spread_dairy_fat_thin             |          | 3:oatcakes_spread_dairy_fat_thin              | 1.25:    | -58%:25% of weight on a slice; normal fat is taken as reduced fat (up to 62% fat) |
| Fat that is spread (medium amount) onto oatcakes: ticked dairy spread, low fat                                                               | :oatcakes_spread_dairy_lowfat_med           |          | 5:oatcakes_spread_dairy_lowfat_med            | 1.75:    | -65%:25% of weight on a slice                                                     |
| Fat that is spread (thick amount) onto oatcakes: ticked dairy spread, low fat                                                                | :oatcakes_spread_dairy_lowfat_thick         |          | 7:oatcakes_spread_dairy_lowfat_thick          | 2.5:     | -64%:25% of weight on a slice                                                     |
| Fat that is spread (thin amount) onto oatcakes: ticked dairy spread, low fat                                                                 | :oatcakes_spread_dairy_lowfat_thin          |          | 3:oatcakes_spread_dairy_lowfat_thin           | 1.25:    | -58%:25% of weight on a slice                                                     |
| Fat that is spread (medium amount) onto oatcakes: ticked dairy spread, very low fat                                                          | :oatcakes_spread_dairy_vlowfat_med          |          | 5:oatcakes_spread_dairy_vlowfat_med           | 1.75:    | -65%:25% of weight on a slice; food composition as low fat spread                 |
| Fat that is spread (thick amount) onto oatcakes: ticked dairy spread, very low fat                                                           | :oatcakes_spread_dairy_vlowfat_thick        |          | 7:oatcakes_spread_dairy_vlowfat_thick         | 2.5:     | -64%:25% of weight on a slice; food composition as low fat spread                 |
| Fat that is spread (thin amount) onto oatcakes: ticked dairy spread, very low fat                                                            | :oatcakes_spread_dairy_vlowfat_thin         |          | 3:oatcakes_spread_dairy_vlowfat_thin          | 1.25:    | -58%:25% of weight on a slice; food composition as low fat spread                 |
| Fat that is spread (medium amount) onto oatcakes: not specified type of spread but ticked cholesterol lowering e.g Benecol, Flora pro active | :oatcakes_spread_dunno_chol_med             |          | 5:oatcakes_spread_dunno_chol_med              | 1.75:    | -65%:25% of weight on a slice                                                     |
| Fat that is spread (thick amount) onto oatcakes: not specified type of spread but ticked cholesterol lowering e.g Benecol, Flora pro active  | :oatcakes_spread_dunno_chol_thick           |          | 7:oatcakes_spread_dunno_chol_thick            | 2.5:     | -64%:25% of weight on a slice                                                     |
| Fat that is spread (thin amount) onto oatcakes: not specified type of spread or amount of % fat                                              | :oatcakes_spread_dunno_chol_thin            |          | 3:oatcakes_spread_dunno_chol_thin             | 1.25:    | -58%:25% of weight on a slice                                                     |
| Fat that is spread (medium amount) onto oatcakes: not specified type of spread or amount of % fat                                            | :oatcakes_spread_dunno_dunno_med            |          | 5:oatcakes_spread_dunno_dunno_med             | 1.75:    | -65%:25% of weight on a slice                                                     |
| Fat that is spread (thick amount) onto oatcakes: not specified type of spread or amount of % fat                                             | :oatcakes_spread_dunno_dunno_thick          |          | 7:oatcakes_spread_dunno_dunno_thick           | 2.5:     | -64%:25% of weight on a slice                                                     |
| Fat that is spread (thin amount) onto oatcakes: not specified type of spread or amount of % fat                                              | :oatcakes_spread_dunno_dunno_thin           |          | 3:oatcakes_spread_dunno_dunno_thin            | 1.25:    | -58%:25% of weight on a slice                                                     |
| Fat that is spread (medium amount) onto oatcakes: not specified type of spread but ticked normal amount % fat                                | :oatcakes_spread_dunno_fat_med              |          | 5:oatcakes_spread_dunno_fat_med               | 1.75:    | -65%:25% of weight on a slice; normal fat is taken as reduced fat (up to 62% fat) |
| Fat that is spread (thick amount) onto oatcakes: not specified type of spread but ticked normal amount % fat                                 | :oatcakes_spread_dunno_fat_thick            |          | 7:oatcakes_spread_dunno_fat_thick             | 2.5:     | -64%:25% of weight on a slice; normal fat is taken as reduced fat (up to 62% fat) |
| Fat that is spread (thin amount) onto oatcakes: not specified type of spread but ticked normal amount % fat                                  | :oatcakes_spread_dunno_fat_thin             |          | 3:oatcakes_spread_dunno_fat_thin              | 1.25:    | -58%:25% of weight on a slice; normal fat is taken as reduced fat (up to 62% fat) |
| Fat that is spread (medium amount) onto oatcakes: not specified type of spread but ticked low fat                                            | :oatcakes_spread_dunno_lowfat_med           |          | 5:oatcakes_spread_dunno_lowfat_med            | 1.75:    | -65%:25% of weight on a slice                                                     |
| Fat that is spread (thick amount) onto oatcakes: not specified type of spread but ticked low fat                                             | :oatcakes_spread_dunno_lowfat_thick         |          | 7:oatcakes_spread_dunno_lowfat_thick          | 2.5:     | -64%:25% of weight on a slice                                                     |
| Fat that is spread (thin amount) onto oatcakes: not specified type of spread but ticked low fat                                              | :oatcakes_spread_dunno_lowfat_thin          |          | 3:oatcakes_spread_dunno_lowfat_thin           | 1.25:    | -58%:25% of weight on a slice                                                     |
| Fat that is spread (medium amount) onto oatcakes: not specified type of spread but ticked very low fat                                       | :oatcakes_spread_dunno_vlowfat_med          |          | 5:oatcakes_spread_dunno_vlowfat_med           | 1.75:    | -65%:25% of weight on a slice; food composition as low fat spread                 |
| Fat that is spread (thick amount) onto oatcakes: not specified type of spread but ticked very low fat                                        | :oatcakes_spread_dunno_vlowfat_thick        |          | 7:oatcakes_spread_dunno_vlowfat_thick         | 2.5:     | -64%:25% of weight on a slice; food composition as low fat spread                 |
| Fat that is spread (thin amount) onto oatcakes: not specified type of spread but ticked very low fat                                         | :oatcakes_spread_dunno_vlowfat_thin         |          | 3:oatcakes_spread_dunno_vlowfat_thin          | 1.25:    | -58%:25% of weight on a slice; food composition as low fat spread                 |
| Fat that is spread (medium amount) onto oatcakes: ticked hard margarine (hard block margarine in wrapper)                                    | :oatcakes_spread_hardmarg_med               |          | 7:oatcakes_spread_hardmarg_med                | 2.5:     | -64%:25% of weight on a slice; spread weight as butter                            |
| Fat that is spread (thick amount) onto oatcakes: ticked hard margarine (hard block margarine in wrapper)                                     | :oatcakes_spread_hardmarg_thick             |          | 10:oatcakes_spread_hardmarg_thick             | 3:       | -70%:25% of weight on a slice; spread weight as butter                            |
| Fat that is spread (thin amount) onto oatcakes: ticked hard margarine (hard block margarine in wrapper)                                      | :oatcakes_spread_hardmarg_thin              |          | 5:oatcakes_spread_hardmarg_thin               | 1.75:    | -65%:25% of weight on a slice; spread weight as butter                            |
| Fat that is spread (medium amount) onto oatcakes: ticked cholesterol lowering olive spread e.g Benecol/Flora pro active olive spread         | :oatcakes_spread_olive_chol_med             |          | 5:oatcakes_spread_olive_chol_med              | 1.75:    | -65%:25% of weight on a slice                                                     |
| Fat that is spread (thick amount) onto oatcakes: ticked cholesterol lowering olive spread e.g Benecol/Flora pro active olive spread          | :oatcakes_spread_olive_chol_thick           |          | 7:oatcakes_spread_olive_chol_thick            | 2.5:     | -64%:25% of weight on a slice                                                     |
| Fat that is spread (thin amount) onto oatcakes: ticked cholesterol lowering olive spread e.g Benecol/Flora pro active olive spread           | :oatcakes_spread_olive_chol_thin            |          | 3:oatcakes_spread_olive_chol_thin             | 1.25:    | -58%:25% of weight on a slice                                                     |
| Fat that is spread (medium amount) onto oatcakes: ticked olive spread but not specified amount of fat                                        | :oatcakes_spread_olive_dunno_med            |          | 5:oatcakes_spread_olive_dunno_med             | 1.75:    | -65%:25% of weight on a slice                                                     |
| Fat that is spread (thick amount) onto oatcakes: ticked olive spread but not specified amount of fat                                         | :oatcakes_spread_olive_dunno_thick          |          | 7:oatcakes_spread_olive_dunno_thick           | 2.5:     | -64%:25% of weight on a slice                                                     |
| Fat that is spread (thin amount) onto oatcakes: ticked olive spread but not specified amount of fat                                          | :oatcakes_spread_olive_dunno_thin           |          | 3:oatcakes_spread_olive_dunno_thin            | 1.25:    | -58%:25% of weight on a slice                                                     |
| Fat that is spread (medium amount) onto oatcakes: ticked olive spread with normal amount of % fat                                            | :oatcakes_spread_olive_fat_med              |          | 5:oatcakes_spread_olive_fat_med               | 1.75:    | -65%:25% of weight on a slice; normal fat is taken as reduced fat (up to 62% fat) |
| Fat that is spread (thick amount) onto oatcakes: ticked olive spread with normal amount of % fat                                             | :oatcakes_spread_olive_fat_thick            |          | 7:oatcakes_spread_olive_fat_thick             | 2.5:     | -64%:25% of weight on a slice; normal fat is taken as reduced fat (up to 62% fat) |
| Fat that is spread (thin amount) onto oatcakes: ticked olive spread with normal amount of % fat                                              | :oatcakes_spread_olive_fat_thin             |          | 3:oatcakes_spread_olive_fat_thin              | 1.25:    | -58%:25% of weight on a slice; normal fat is taken as reduced fat (up to 62% fat) |
| Fat that is spread (medium amount) onto oatcakes: ticked olive spread, low fat                                                               | :oatcakes_spread_olive_lowfat_med           |          | 5:oatcakes_spread_olive_lowfat_med            | 1.75:    | -65%:25% of weight on a slice                                                     |
| Fat that is spread (thick amount) onto oatcakes: ticked olive spread, low fat                                                                | :oatcakes_spread_olive_lowfat_thick         |          | 7:oatcakes_spread_olive_lowfat_thick          | 2.5:     | -64%:25% of weight on a slice                                                     |
| Fat that is spread (thin amount) onto oatcakes: ticked olive spread, low fat                                                                 | :oatcakes_spread_olive_lowfat_thin          |          | 3:oatcakes_spread_olive_lowfat_thin           | 1.25:    | -58%:25% of weight on a slice                                                     |
| Fat that is spread (medium amount) onto oatcakes: ticked olive spread, very low fat                                                          | :oatcakes_spread_olive_vlowfat_med          |          | 5:oatcakes_spread_olive_vlowfat_med           | 1.75:    | -65%:25% of weight on a slice; food composition as low fat spread                 |
| Fat that is spread (thick amount) onto oatcakes: ticked olive spread, very low fat                                                           | :oatcakes_spread_olive_vlowfat_thick        |          | 7:oatcakes_spread_olive_vlowfat_thick         | 2.5:     | -64%:25% of weight on a slice; food composition as low fat spread                 |
| Fat that is spread (thin amount) onto oatcakes: ticked olive spread, very low fat                                                            | :oatcakes_spread_olive_vlowfat_thin         |          | 3:oatcakes_spread_olive_vlowfat_thin          | 1.25:    | -58%:25% of weight on a slice; food composition as low fat spread                 |
| Fat that is spread (medium amount) onto oatcakes: ticked other spread e.g ghee                                                               | :oatcakes_spread_other_med                  |          | 5:oatcakes_spread_other_med                   | 1.75:    | -65%:25% of weight on a slice                                                     |
| Fat that is spread (thick amount) onto oatcakes: ticked other spread e.g ghee                                                                | :oatcakes_spread_other_thick                |          | 7:oatcakes_spread_other_thick                 | 2.5:     | -64%:25% of weight on a slice                                                     |
| Fat that is spread (thin amount) onto oatcakes: ticked other spread e.g ghee                                                                 | :oatcakes_spread_other_thin                 |          | 3:oatcakes_spread_other_thin                  | 1.25:    | -58%:25% of weight on a slice                                                     |
| Fat that is spread (medium amount) onto oatcakes: ticked polyunsaturated margarine (e.g Flora) and also cholesterol lowering                 | :oatcakes_spread_polymarg_chol_med          |          | 5:oatcakes_spread_polymarg_chol_med           | 1.75:    | -65%:25% of weight on a slice                                                     |
| Fat that is spread (thick amount) onto oatcakes: ticked polyunsaturated margarine (e.g Flora) and also cholesterol lowering                  | :oatcakes_spread_polymarg_chol_thick        |          | 7:oatcakes_spread_polymarg_chol_thick         | 2.5:     | -64%:25% of weight on a slice                                                     |
| Fat that is spread (thin amount) onto oatcakes: ticked polyunsaturated margarine (e.g Flora) and also cholesterol lowering                   | :oatcakes_spread_polymarg_chol_thin         |          | 3:oatcakes_spread_polymarg_chol_thin          | 1.25:    | -58%:25% of weight on a slice                                                     |
| Fat that is spread (medium amount) onto oatcakes: ticked polyunsaturated margarine (e.g Flora) but not specified amount of fat               | :oatcakes_spread_polymarg_dunno_med         |          | 5:oatcakes_spread_polymarg_dunno_med          | 1.75:    | -65%:25% of weight on a slice                                                     |
| Fat that is spread (thick amount) onto oatcakes: ticked polyunsaturated margarine (e.g Flora) but not specified amount of fat                | :oatcakes_spread_polymarg_dunno_thick       |          | 7:oatcakes_spread_polymarg_dunno_thick        | 2.5:     | -64%:25% of weight on a slice                                                     |
| Fat that is spread (thin amount) onto oatcakes: ticked polyunsaturated margarine (e.g Flora) but not specified amount of fat                 | :oatcakes_spread_polymarg_dunno_thin        |          | 3:oatcakes_spread_polymarg_dunno_thin         | 1.25:    | -58%:25% of weight on a slice                                                     |
| Fat that is spread (medium amount) onto oatcakes: ticked polyunsaturated margarine (e.g Flora), normal amount of % fat                       | :oatcakes_spread_polymarg_fat_med           |          | 5:oatcakes_spread_polymarg_fat_med            | 1.75:    | -65%:25% of weight on a slice; normal fat is taken as reduced fat (up to 62% fat) |
| Fat that is spread (thick amount) onto oatcakes: ticked polyunsaturated margarine (e.g Flora), normal amount of % fat                        | :oatcakes_spread_polymarg_fat_thick         |          | 7:oatcakes_spread_polymarg_fat_thick          | 2.5:     | -64%:25% of weight on a slice; normal fat is taken as reduced fat (up to 62% fat) |
| Fat that is spread (thin amount) onto oatcakes: ticked polyunsaturated margarine (e.g Flora), normal amount of % fat                         | :oatcakes_spread_polymarg_fat_thin          |          | 3:oatcakes_spread_polymarg_fat_thin           | 1.25:    | -58%:25% of weight on a slice; normal fat is taken as reduced fat (up to 62% fat) |
| Fat that is spread (medium amount) onto oatcakes: ticked polyunsaturated margarine (e.g Flora), low fat                                      | :oatcakes_spread_polymarg_lowfat_med        |          | 5:oatcakes_spread_polymarg_lowfat_med         | 1.75:    | -65%:25% of weight on a slice                                                     |
| Fat that is spread (thick amount) onto oatcakes: ticked polyunsaturated margarine (e.g Flora), low fat                                       | :oatcakes_spread_polymarg_lowfat_thick      |          | 7:oatcakes_spread_polymarg_lowfat_thick       | 2.5:     | -64%:25% of weight on a slice                                                     |
| Fat that is spread (thin amount) onto oatcakes: ticked polyunsaturated margarine (e.g Flora), low fat                                        | :oatcakes_spread_polymarg_lowfat_thin       |          | 3:oatcakes_spread_polymarg_lowfat_thin        | 1.25:    | -58%:25% of weight on a slice                                                     |
| Fat that is spread (medium amount) onto oatcakes: ticked polyunsaturated margarine (e.g Flora), very low fat                                 | :oatcakes_spread_polymarg_vlowfat_med       |          | 5:oatcakes_spread_polymarg_vlowfat_med        | 1.75:    | -65%:25% of weight on a slice; food composition as low fat spread                 |
| Fat that is spread (thick amount) onto oatcakes: ticked polyunsaturated margarine (e.g Flora), very low fat                                  | :oatcakes_spread_polymarg_vlowfat_thick     |          | 7:oatcakes_spread_polymarg_vlowfat_thick      | 2.5:     | -64%:25% of weight on a slice; food composition as low fat spread                 |
| Fat that is spread (thin amount) onto oatcakes: ticked polyunsaturated margarine (e.g Flora), very low fat                                   | :oatcakes_spread_polymarg_vlowfat_thin      |          | 3:oatcakes_spread_polymarg_vlowfat_thin       | 1.25:    | -58%:25% of weight on a slice; food composition as low fat spread                 |
| Fat that is spread (medium amount) onto oatcakes: ticked soya/vegan/dairy free margarine e.g Pure, and also cholesterol lowering             | :oatcakes_spread_soya_chol_med              |          | 5:oatcakes_spread_soya_chol_med               | 1.75:    | -65%:25% of weight on a slice                                                     |
| Fat that is spread (thick amount) onto oatcakes: ticked soya/vegan/dairy free margarine e.g Pure, and also cholesterol lowering              | :oatcakes_spread_soya_chol_thick            |          | 7:oatcakes_spread_soya_chol_thick             | 2.5:     | -64%:25% of weight on a slice                                                     |
| Fat that is spread (thin amount) onto oatcakes: ticked soya/vegan/dairy free margarine e.g Pure, and also cholesterol lowering               | :oatcakes_spread_soya_chol_thin             |          | 3:oatcakes_spread_soya_chol_thin              | 1.25:    | -58%:25% of weight on a slice                                                     |
| Fat that is spread (medium amount) onto oatcakes: ticked soya/vegan/dairy free margarine e.g Pure, and not specified amount of fat           | :oatcakes_spread_soya_dunno_med             |          | 5:oatcakes_spread_soya_dunno_med              | 1.75:    | -65%:25% of weight on a slice                                                     |
| Fat that is spread (thick amount) onto oatcakes: ticked soya/vegan/dairy free margarine e.g Pure, and not specified amount of fat            | :oatcakes_spread_soya_dunno_thick           |          | 7:oatcakes_spread_soya_dunno_thick            | 2.5:     | -64%:25% of weight on a slice                                                     |
| Fat that is spread (thin amount) onto oatcakes: ticked soya/vegan/dairy free margarine e.g Pure, and not specified amount of fat             | :oatcakes_spread_soya_dunno_thin            |          | 3:oatcakes_spread_soya_dunno_thin             | 1.25:    | -58%:25% of weight on a slice                                                     |
| Fat that is spread (medium amount) onto oatcakes: ticked soya/vegan/dairy free margarine (e.g Pure), normal amount % fat                     | :oatcakes_spread_soya_fat_med               |          | 5:oatcakes_spread_soya_fat_med                | 1.75:    | -65%:25% of weight on a slice; normal fat is taken as reduced fat (up to 62% fat) |
| Fat that is spread (thick amount) onto oatcakes: ticked soya/vegan/dairy free margarine (e.g Pure), normal amount % fat                      | :oatcakes_spread_soya_fat_thick             |          | 7:oatcakes_spread_soya_fat_thick              | 2.5:     | -64%:25% of weight on a slice; normal fat is taken as reduced fat (up to 62% fat) |
| Fat that is spread (thin amount) onto oatcakes: ticked soya/vegan/dairy free margarine (e.g Pure), normal amount % fat                       | :oatcakes_spread_soya_fat_thin              |          | 3:oatcakes_spread_soya_fat_thin               | 1.25:    | -58%:25% of weight on a slice; normal fat is taken as reduced fat (up to 62% fat) |
| Fat that is spread (medium amount) onto oatcakes: ticked soya/vegan/dairy free margarine (e.g Pure), low fat                                 | :oatcakes_spread_soya_lowfat_med            |          | 5:oatcakes_spread_soya_lowfat_med             | 1.75:    | -65%:25% of weight on a slice                                                     |
| Fat that is spread (thick amount) onto oatcakes: ticked soya/vegan/dairy free margarine (e.g Pure), low fat                                  | :oatcakes_spread_soya_lowfat_thick          |          | 7:oatcakes_spread_soya_lowfat_thick           | 2.5:     | -64%:25% of weight on a slice                                                     |
| Fat that is spread (thin amount) onto oatcakes: ticked soya/vegan/dairy free margarine (e.g Pure), low fat                                   | :oatcakes_spread_soya_lowfat_thin           |          | 3:oatcakes_spread_soya_lowfat_thin            | 1.25:    | -58%:25% of weight on a slice                                                     |
| Fat that is spread (medium amount) onto oatcakes: ticked soya/vegan/dairy free margarine (e.g Pure), very low fat                            | :oatcakes_spread_soya_vlowfat_med           |          | 5:oatcakes_spread_soya_vlowfat_med            | 1.75:    | -65%:25% of weight on a slice; food composition as low fat spread                 |
| Fat that is spread (thick amount) onto oatcakes: ticked soya/vegan/dairy free margarine (e.g Pure), very low fat                             | :oatcakes_spread_soya_vlowfat_thick         |          | 7:oatcakes_spread_soya_vlowfat_thick          | 2.5:     | -64%:25% of weight on a slice; food composition as low fat spread                 |
| Fat that is spread (thin amount) onto oatcakes: ticked soya/vegan/dairy free margarine (e.g Pure), very low fat                              | :oatcakes_spread_soya_vlowfat_thin          |          | 3:oatcakes_spread_soya_vlowfat_thin           | 1.25:    | -58%:25% of weight on a slice; food composition as low fat spread                 |
| Scotch pancake, blini, American style pancake made with cholesterol lowering milk                                                            | :pancake_blini                              |          | 41:pancake_blini_chol                         | 41:      | 0%:Milk type taken into account in the updated version                            |
| Scotch pancake, blini, American style pancake made with milk (cow's) unspecified                                                             | :pancake_blini                              |          | 41:pancake_blini_dontknow                     | 41:      | 0%:Milk type taken into account in the updated version                            |
| Scotch pancake, blini, American style pancake made with goat's or sheep's milk                                                               | :pancake_blini                              |          | 41:pancake_blini_goatsheep                    | 41:      | 0%:Milk type taken into account in the updated version                            |
| Scotch pancake, blini, American style pancake made with other milk (e.g 1% milk, lactose free milk, almond milk)                             | :pancake_blini                              |          | 41:pancake_blini_other                        | 41:      | 0%:Milk type taken into account in the updated version                            |
| Scotch pancake, blini, American style pancake made with powdered milk made up                                                                | :pancake_blini                              |          | 41:pancake_blini_powdered                     | 41:      | 0%:Milk type taken into account in the updated version                            |
| Scotch pancake, blini, American style pancake made with rice, oat, almond, coconut milk                                                      | :pancake_blini                              |          | 41:pancake_blini_riceoatveg                   | 41:      | 0%:Milk type taken into account in the updated version                            |
| Scotch pancake, blini, American style pancake made with semi skimmed milk                                                                    | :pancake_blini                              |          | 41:pancake_blini_semi                         | 41:      | 0%:Milk type taken into account in the updated version                            |
| Scotch pancake, blini, American style pancake made with skimmed milk                                                                         | :pancake_blini                              |          | 41:pancake_blini_skimmed                      | 41:      | 0%:Milk type taken into account in the updated version                            |
| Scotch pancake, blini, American style pancake made with soya milk with added calcium                                                         | :pancake_blini                              |          | 41:pancake_blini_soya_ca                      | 41:      | 0%:Milk type taken into account in the updated version                            |
| Scotch pancake, blini, American style pancake made with soya milk with no added calcium                                                      | :pancake_blini                              |          | 41:pancake_blini_soya_noca                    | 41:      | 0%:Milk type taken into account in the updated version                            |
| Scotch pancake, blini, American style pancake made with whole milk                                                                           | :pancake_blini                              |          | 41:pancake_blini_whole                        | 41:      | 0%:Milk type taken into account in the updated version                            |
| Pancake, crêpe made with cholesterol lowering milk                                                                                           | :pancake_crepe                              |          | 110:pancake_crepe_chol                        | 110:     | 0%:Milk type taken into account in the updated version                            |
| Pancake, crêpe made with milk (cow's) unspecified                                                                                            | :pancake_crepe                              |          | 110:pancake_crepe_dontknow                    | 110:     | 0%:Milk type taken into account in the updated version                            |

Supplementary Table 1

|                                                                                                                                          | McCance and Widdowson's      | Portion | Nutrient databank + other changes     | Portion | Portion:                                                                                                                                              |
|------------------------------------------------------------------------------------------------------------------------------------------|------------------------------|---------|---------------------------------------|---------|-------------------------------------------------------------------------------------------------------------------------------------------------------|
| Variable description                                                                                                                     | Food item                    | size    | Food item                             | size    | diff%:Description of differences with previous version                                                                                                |
| Pancake, crêpe made with goat's or sheep's milk                                                                                          | :pancake_crepe               | 110:    | 110:pancake_crepe_goatsheep           | 110:    | 0%:Milk type taken into account in the updated version                                                                                                |
| Pancake, crêpe made with other milk (e.g 1% milk, lactose free milk, almond milk)                                                        | :pancake_crepe               | 110:    | 110:pancake_crepe_other               | 110:    | 0%:Milk type taken into account in the updated version                                                                                                |
| Pancake, crêpe made with powdered milk made up                                                                                           | :pancake_crepe               | 110:    | 110:pancake_crepe_powdered            | 110:    | 0%:Milk type taken into account in the updated version                                                                                                |
| Pancake, crêpe made with rice, oat, almond, coconut milk                                                                                 | :pancake_crepe               | 110:    | 110:pancake_crepe_riceoatveg          | 110:    | 0%:Milk type taken into account in the updated version                                                                                                |
| Pancake, crêpe made with semi skimmed milk                                                                                               | :pancake_crepe               | 110:    | 110:pancake_crepe_semi                | 110:    | 0%:Milk type taken into account in the updated version                                                                                                |
| Pancake, crêpe made with skimmed milk                                                                                                    | :pancake_crepe               | 110:    | 110:pancake_crepe_skimmed             | 110:    | 0%:Milk type taken into account in the updated version                                                                                                |
| Pancake, crêpe made with soya milk with added calcium                                                                                    | :pancake_crepe               | 110:    | 110:pancake_crepe_soya_ca             | 110:    | 0%:Milk type taken into account in the updated version                                                                                                |
| Pancake, crêpe made with soya milk with no added calcium                                                                                 | :pancake_crepe               | 110:    | 110:pancake_crepe_soya_noca           | 110:    | 0%:Milk type taken into account in the updated version                                                                                                |
| Pancake, crêpe made with whole milk                                                                                                      | :pancake_crepe               | 110:    | 110:pancake_crepe_whole               | 110:    | 0%:Milk type taken into account in the updated version                                                                                                |
| Brown pasta                                                                                                                              | :pasta_brown                 | 230:    | 230:pasta_brown                       | 230:    | 0%:                                                                                                                                                   |
| Gluten free pasta (rice/millet)                                                                                                          |                              |         | :pasta_gf                             | 230:    | -:Gluten free version added to the updated version                                                                                                    |
| White pasta                                                                                                                              | :pasta_white                 | 230:    | 230:pasta_white                       | 230:    | 0%:                                                                                                                                                   |
| Pesto                                                                                                                                    | :pesto                       | 26:     | 26:pesto                              | 26:     | 0%:                                                                                                                                                   |
| Pizza                                                                                                                                    | :pizza                       | 150:    | 150:pizza                             | 150:    | 0%:                                                                                                                                                   |
| Pizza                                                                                                                                    |                              |         | :pizza_gf                             | 150:    | -:Gluten free version added to the updated version (however no gluten free code available at the time so the non-gluten free code was used)           |
| Peanut butter, chocolate/nut spread (e.g. Nutella)                                                                                       | :pnutbutter_nutella          | 16:     | 16:pnutbutter_nutella                 | 16:     | 0%:                                                                                                                                                   |
| Potato boiled                                                                                                                            | :potato_boil                 | 175:    | 175:potato_boil                       | 175:    | 0%:                                                                                                                                                   |
| Knob of butter or margarine added to boiled potatoes                                                                                     | :potato_boil_marg            | 25:     | 25:potato_boil_marg                   | 25:     | 0%:                                                                                                                                                   |
| Potatoes: fried, chips, wedges, roast                                                                                                    | :potato_fried                | 180:    | 180:potato_fried                      | 180:    | 0%:                                                                                                                                                   |
| Mashed potato with milk and fat: Fat specified as butter but not specified amount of % fat                                               | :potato_mashed               | 60:     | 60:potato_mashed_butter_dunno         | 180:    | 200%:Fat used taken into account in the updated version + serving increased from 1 to 3 scoops to obtain a portion size similar to other potato items |
| Mashed potato with milk and fat: Fat specified as butter, normal amount of % fat                                                         | :potato_mashed               | 60:     | 60:potato_mashed_butter_fat           | 180:    | 200%:Fat used taken into account in the updated version + serving increased from 1 to 3 scoops to obtain a portion size similar to other potato items |
| Mashed potato with milk and fat: Fat specified as butter, low fat                                                                        | :potato_mashed               | 60:     | 60:potato_mashed_butter_lowfat        | 180:    | 200%:Fat used taken into account in the updated version + serving increased from 1 to 3 scoops to obtain a portion size similar to other potato items |
| Mashed potato with milk and fat: Fat specified as spreadable butter with normal amount of % fat                                          | :potato_mashed               | 60:     | 60:potato_mashed_butter_spread_fat    | 180:    | 200%:Fat used taken into account in the updated version + serving increased from 1 to 3 scoops to obtain a portion size similar to other potato items |
| Mashed potato with milk and fat: Fat specified as spreadable butter, low fat                                                             | :potato_mashed               | 60:     | 60:potato_mashed_butter_spread_lowfat | 180:    | 200%:Fat used taken into account in the updated version + serving increased from 1 to 3 scoops to obtain a portion size similar to other potato items |
| Mashed potato with milk and fat: Fat specified as not known type of fat or spread                                                        | :potato_mashed               | 60:     | 60:potato_mashed_fat_dunno            | 180:    | 200%:Fat used taken into account in the updated version + serving increased from 1 to 3 scoops to obtain a portion size similar to other potato items |
| Mashed potato with milk and no fat added                                                                                                 | :potato_mashed               | 60:     | 60:potato_mashed_fat_none             | 180:    | 200%:Fat used taken into account in the updated version + serving increased from 1 to 3 scoops to obtain a portion size similar to other potato items |
| Mashed potato with milk and fat: Fat specified as other type of fat or spread e.g ghee, dripping                                         | :potato_mashed               | 60:     | 60:potato_mashed_fat_other            | 180:    | 200%:Fat used taken into account in the updated version + serving increased from 1 to 3 scoops to obtain a portion size similar to other potato items |
| Mashed potato with milk and fat: Fat specified as lard                                                                                   | :potato_mashed               | 60:     | 60:potato_mashed_lard                 | 180:    | 200%:Fat used taken into account in the updated version + serving increased from 1 to 3 scoops to obtain a portion size similar to other potato items |
| Mashed potato with milk and fat: Fat specified as hard margarine (hard block margarine in wrapper)                                       | :potato_mashed               | 60:     | 60:potato_mashed_marg_hard            | 180:    | 200%:Fat used taken into account in the updated version + serving increased from 1 to 3 scoops to obtain a portion size similar to other potato items |
| Mashed potato with milk and fat: Fat specified as polyunsaturated margarine (e.g Flora) and also cholesterol lowering                    | :potato_mashed               | 60:     | 60:potato_mashed_marg_poly_chol       | 180:    | 200%:Fat used taken into account in the updated version + serving increased from 1 to 3 scoops to obtain a portion size similar to other potato items |
| Mashed potato with milk and fat: Fat specified as polyunsaturated margarine (e.g Flora) but not specified amount of fat                  | :potato_mashed               | 60:     | 60:potato_mashed_marg_poly_dunno      | 180:    | 200%:Fat used taken into account in the updated version + serving increased from 1 to 3 scoops to obtain a portion size similar to other potato items |
| Mashed potato with milk and fat: Fat specified as polyunsaturated margarine (e.g Flora), normal amount of % fat                          | :potato_mashed               | 60:     | 60:potato_mashed_marg_poly_fat        | 180:    | 200%:Fat used taken into account in the updated version + serving increased from 1 to 3 scoops to obtain a portion size similar to other potato items |
| Mashed potato with milk and fat: Fat specified as polyunsaturated margarine (e.g Flora), low fat                                         | :potato_mashed               | 60:     | 60:potato_mashed_marg_poly_lowfat     | 180:    | 200%:Fat used taken into account in the updated version + serving increased from 1 to 3 scoops to obtain a portion size similar to other potato items |
| Mashed potato with milk and fat: Fat specified as polyunsaturated margarine (e.g Flora), very low fat                                    | :potato_mashed               | 60:     | 60:potato_mashed_marg_poly_vlowfat    | 180:    | 200%:Fat used taken into account in the updated version + serving increased from 1 to 3 scoops to obtain a portion size similar to other potato items |
| Mashed potato with milk and fat: Fat specified as soya/vegan/dairy free margarine e.g Pure, and also cholesterol lowering                | :potato_mashed               | 60:     | 60:potato_mashed_marg_soya_chol       | 180:    | 200%:Fat used taken into account in the updated version + serving increased from 1 to 3 scoops to obtain a portion size similar to other potato items |
| Mashed potato with milk and fat: Fat specified as soya/vegan/dairy free margarine e.g Pure, and not specified amount of fat              | :potato_mashed               | 60:     | 60:potato_mashed_marg_soya_dunno      | 180:    | 200%:Fat used taken into account in the updated version + serving increased from 1 to 3 scoops to obtain a portion size similar to other potato items |
| Mashed potato with milk and fat: Fat specified as soya/vegan/dairy free margarine (e.g Pure), normal amount % fat                        | :potato_mashed               | 60:     | 60:potato_mashed_marg_soya_fat        | 180:    | 200%:Fat used taken into account in the updated version + serving increased from 1 to 3 scoops to obtain a portion size similar to other potato items |
| Mashed potato with milk and fat: Fat specified as soya/vegan/dairy free margarine (e.g Pure), low fat                                    | :potato_mashed               | 60:     | 60:potato_mashed_marg_soya_lowfat     | 180:    | 200%:Fat used taken into account in the updated version + serving increased from 1 to 3 scoops to obtain a portion size similar to other potato items |
| Mashed potato with milk and fat: Fat specified as soya/vegan/dairy free margarine (e.g Pure), very low fat                               | :potato_mashed               | 60:     | 60:potato_mashed_marg_soya_vlowfat    | 180:    | 200%:Fat used taken into account in the updated version + serving increased from 1 to 3 scoops to obtain a portion size similar to other potato items |
| Mashed potato with milk and fat: Fat specified as olive oil                                                                              | :potato_mashed               | 60:     | 60:potato_mashed_oil_olive            | 180:    | 200%:Fat used taken into account in the updated version + serving increased from 1 to 3 scoops to obtain a portion size similar to other potato items |
| Mashed potato with milk and fat: Fat specified as other oil e.g corn, groundnut, rice bran oil                                           | :potato_mashed               | 60:     | 60:potato_mashed_oil_other            | 180:    | 200%:Fat used taken into account in the updated version + serving increased from 1 to 3 scoops to obtain a portion size similar to other potato items |
| Mashed potato with milk and fat: Fat specified as rapeseed oil                                                                           | :potato_mashed               | 60:     | 60:potato_mashed_oil_rapeseed         | 180:    | 200%:Fat used taken into account in the updated version + serving increased from 1 to 3 scoops to obtain a portion size similar to other potato items |
| Mashed potato with milk and fat: Fat specified as sunflower oil                                                                          | :potato_mashed               | 60:     | 60:potato_mashed_oil_sunflower        | 180:    | 200%:Fat used taken into account in the updated version + serving increased from 1 to 3 scoops to obtain a portion size similar to other potato items |
| Mashed potato with milk and fat: Fat specified as vegetable oil                                                                          | :potato_mashed               | 60:     | 60:potato_mashed_oil_veg              | 180:    | 200%:Fat used taken into account in the updated version + serving increased from 1 to 3 scoops to obtain a portion size similar to other potato items |
| Mashed potato with milk and fat: Fat specified as dairy spread which is also cholesterol lowering e.g Benecol Buttery                    | :potato_mashed               | 60:     | 60:potato_mashed_spread_dairy_chol    | 180:    | 200%:Fat used taken into account in the updated version + serving increased from 1 to 3 scoops to obtain a portion size similar to other potato items |
| Mashed potato with milk and fat: Fat specified as dairy spread but not specified amount of % fat                                         | :potato_mashed               | 60:     | 60:potato_mashed_spread_dairy_dunno   | 180:    | 200%:Fat used taken into account in the updated version + serving increased from 1 to 3 scoops to obtain a portion size similar to other potato items |
| Mashed potato with milk and fat: Fat specified as dairy spread with normal amount of % fat                                               | :potato_mashed               | 60:     | 60:potato_mashed_spread_dairy_fat     | 180:    | 200%:Fat used taken into account in the updated version + serving increased from 1 to 3 scoops to obtain a portion size similar to other potato items |
| Mashed potato with milk and fat: Fat specified as dairy spread, low fat                                                                  | :potato_mashed               | 60:     | 60:potato_mashed_spread_dairy_lowfat  | 180:    | 200%:Fat used taken into account in the updated version + serving increased from 1 to 3 scoops to obtain a portion size similar to other potato items |
| Mashed potato with milk and fat: Fat specified as dairy spread, very low fat                                                             | :potato_mashed               | 60:     | 60:potato_mashed_spread_dairy_vlowfat | 180:    | 200%:Fat used taken into account in the updated version + serving increased from 1 to 3 scoops to obtain a portion size similar to other potato items |
| Mashed potato with milk and fat: Fat specified as not known type of spread but ticked cholesterol lowering e.g Benecol, Flora pro active | :potato_mashed               | 60:     | 60:potato_mashed_spread_dunno_chol    | 180:    | 200%:Fat used taken into account in the updated version + serving increased from 1 to 3 scoops to obtain a portion size similar to other potato items |
| Mashed potato with milk and fat: Fat specified as not known type of spread or amount of % fat                                            | :potato_mashed               | 60:     | 60:potato_mashed_spread_dunno_dunno   | 180:    | 200%:Fat used taken into account in the updated version + serving increased from 1 to 3 scoops to obtain a portion size similar to other potato items |
| Mashed potato with milk and fat: Fat specified as not known type of spread but ticked normal amount % fat                                | :potato_mashed               | 60:     | 60:potato_mashed_spread_dunno_fat     | 180:    | 200%:Fat used taken into account in the updated version + serving increased from 1 to 3 scoops to obtain a portion size similar to other potato items |
| Mashed potato with milk and fat: Fat specified as not known type of spread but ticked low fat                                            | :potato_mashed               | 60:     | 60:potato_mashed_spread_dunno_lowfat  | 180:    | 200%:Fat used taken into account in the updated version + serving increased from 1 to 3 scoops to obtain a portion size similar to other potato items |
| Mashed potato with milk and fat: Fat specified as not known type of spread but ticked very low fat                                       | :potato_mashed               | 60:     | 60:potato_mashed_spread_dunno_vlowfat | 180:    | 200%:Fat used taken into account in the updated version + serving increased from 1 to 3 scoops to obtain a portion size similar to other potato items |
| Mashed potato with milk and fat: Fat specified as cholesterol lowering olive spread e.g Benecol/Flora pro active olive spread            | :potato_mashed               | 60:     | 60:potato_mashed_spread_olive_chol    | 180:    | 200%:Fat used taken into account in the updated version + serving increased from 1 to 3 scoops to obtain a portion size similar to other potato items |
| Mashed potato with milk and fat: Fat specified as olive spread but not specified amount of fat                                           | :potato_mashed               | 60:     | 60:potato_mashed_spread_olive_dunno   | 180:    | 200%:Fat used taken into account in the updated version + serving increased from 1 to 3 scoops to obtain a portion size similar to other potato items |
| Mashed potato with milk and fat: Fat specified as olive spread with normal amount of % fat                                               | :potato_mashed               | 60:     | 60:potato_mashed_spread_olive_fat     | 180:    | 200%:Fat used taken into account in the updated version + serving increased from 1 to 3 scoops to obtain a portion size similar to other potato items |
| Mashed potato with milk and fat: Fat specified as olive spread, low fat                                                                  | :potato_mashed               | 60:     | 60:potato_mashed_spread_olive_lowfat  | 180:    | 200%:Fat used taken into account in the updated version + serving increased from 1 to 3 scoops to obtain a portion size similar to other potato items |
| Mashed potato with milk and fat: Fat specified as olive spread, very low fat                                                             | :potato_mashed               | 60:     | 60:potato_mashed_spread_olive_vlowfat | 180:    | 200%:Fat used taken into account in the updated version + serving increased from 1 to 3 scoops to obtain a portion size similar to other potato items |
| Chicken or turkey, skin removed, in breadcrumbs or deep fried e.g. nuggets, KFC                                                          | :poultry_friedcrumb_noskin   | 100:    | 100:poultry_friedcrumb_noskin         | 100:    | 0%:                                                                                                                                                   |
| Chicken or turkey, skin left on, in breadcrumbs or deep fried e.g. nuggets, KFC                                                          | :poultry_friedcrumb_withskin | 100:    | 100:poultry_friedcrumb_withskin       | 100:    | 0%:Removed skin from mapping; unlikely to contain skin due to preparation method                                                                      |
| Chicken or turkey, skin removed e.g. roast, drumsticks, curry                                                                            | :poultry_noskin              | 130:    | 130:poultry_noskin                    | 130:    | 0%:                                                                                                                                                   |
| Chicken or turkey, skin left on e.g. roast, drumsticks, curry                                                                            | :poultry_withskin            | 130:    | 130:poultry_withskin                  | 130:    | 0%:                                                                                                                                                   |
| Brown rice                                                                                                                               | :rice_brown                  | 150:    | 150:rice_brown                        | 150:    | 0%:                                                                                                                                                   |
| White rice                                                                                                                               | :rice_white                  | 150:    | 150:rice_white                        | 150:    | 0%:                                                                                                                                                   |
| Salad dressing e.g french dressing                                                                                                       | :salad_dressing              | 15:     | 15:salad_dressing                     | 15:     | 0%:                                                                                                                                                   |
| Brown sauce/ BBQ sauce                                                                                                                   | :sauce_brown                 | 15:     | 15:sauce_brown                        | 15:     | 0%:                                                                                                                                                   |
| Cheese sauce made with cholesterol lowering milk                                                                                         | :sauce_cheese                | 62:     | 62:sauce_cheese_chol                  | 62:     | 0%:Milk type taken into account in the updated version                                                                                                |
| Cheese sauce made with milk (cow's) unspecified                                                                                          | :sauce_cheese                | 62:     | 62:sauce_cheese_dontknow              | 62:     | 0%:Milk type taken into account in the updated version                                                                                                |
| Cheese sauce made with goat's or sheep's milk                                                                                            | :sauce_cheese                | 62:     | 62:sauce_cheese_goatsheep             | 62:     | 0%:Milk type taken into account in the updated version                                                                                                |
| Cheese sauce made with other milk (e.g 1% milk, lactose free milk, almond milk)                                                          | :sauce_cheese                | 62:     | 62:sauce_cheese_other                 | 62:     | 0%:Milk type taken into account in the updated version                                                                                                |
| Cheese sauce made with powdered milk made up                                                                                             | :sauce_cheese                | 62:     | 62:sauce_cheese_powdered              | 62:     | 0%:Milk type taken into account in the updated version                                                                                                |
| Cheese sauce made with rice, oat, almond, coconut milk                                                                                   | :sauce_cheese                | 62:     | 62:sauce_cheese_riceoatveg            | 62:     | 0%:Milk type taken into account in the updated version                                                                                                |
| Cheese sauce made with semi skimmed milk                                                                                                 | :sauce_cheese                | 62:     | 62:sauce_cheese_semi                  | 62:     | 0%:Milk type taken into account in the updated version                                                                                                |
| Cheese sauce made with skimmed milk                                                                                                      | :sauce_cheese                | 62:     | 62:sauce_cheese_skimmed               | 62:     | 0%:Milk type taken into account in the updated version                                                                                                |
| Cheese sauce made with soya milk with added calcium                                                                                      | :sauce_cheese                | 62:     | 62:sauce_cheese_soya_ca               | 62:     | 0%:Milk type taken into account in the updated version                                                                                                |
| Cheese sauce made with soya milk with no added calcium                                                                                   | :sauce_cheese                | 62:     | 62:sauce_cheese_soya_noca             | 62:     | 0%:Milk type taken into account in the updated version                                                                                                |
| Cheese sauce made with whole milk                                                                                                        | :sauce_cheese                | 62:     | 62:sauce_cheese_soya_noca             | 62:     | 0%:Milk type taken into account in the updated version                                                                                                |
| Gravy                                                                                                                                    | :sauce_gravy                 | 50:     | 50:sauce_gravy                        | 50:     | 0%:                                                                                                                                                   |
| Tomato ketchup                                                                                                                           | :sauce_ketchup               | 30:     | 30:sauce_ketchup                      | 30:     | 0%:                                                                                                                                                   |
| Tomato based sauce e.g pasta sauce                                                                                                       | :sauce_tomato                | 90:     | 90:sauce_tomato                       | 90:     | 0%:                                                                                                                                                   |
| White or cream sauce e.g bechamel made with cholesterol lowering milk                                                                    | :sauce_white                 | 62:     | 62:sauce_white_chol                   | 62:     | 0%:Milk type taken into account in the updated version                                                                                                |
| White or cream sauce e.g bechamel made with milk (cow's) unspecified                                                                     | :sauce_white                 | 62:     | 62:sauce_white_dontknow               | 62:     | 0%:Milk type taken into account in the updated version                                                                                                |
| White or cream sauce e.g bechamel made with goat's or sheep's milk                                                                       | :sauce_white                 | 62:     | 62:sauce_white_goatsheep              | 62:     | 0%:Milk type taken into account in the updated version                                                                                                |
| White or cream sauce e.g bechamel made with other milk (e.g 1% milk, lactose free milk, almond milk)                                     | :sauce_white                 | 62:     | 62:sauce_white_other                  | 62:     | 0%:Milk type taken into account in the updated version                                                                                                |
| White or cream sauce e.g bechamel made with powdered milk made up                                                                        | :sauce_white                 | 62:     | 62:sauce_white_powdered               | 62:     | 0%:Milk type taken into account in the updated version                                                                                                |
| White or cream sauce e.g bechamel made with rice, oat, almond, coconut milk                                                              | :sauce_white                 | 62:     | 62:sauce_white_riceoatveg             | 62:     | 0%:Milk type taken into account in the updated version                                                                                                |
| White or cream sauce e.g bechamel made with semi skimmed milk                                                                            | :sauce_white                 | 62:     | 62:sauce_white_semi                   | 62:     | 0%:Milk type taken into account in the updated version                                                                                                |
| White or cream sauce e.g bechamel made with skimmed milk                                                                                 | :sauce_white                 | 62:     | 62:sauce_white_skimmed                | 62:     | 0%:Milk type taken into account in the updated version                                                                                                |
| White or cream sauce e.g bechamel made with soya milk with added calcium                                                                 | :sauce_white                 | 62:     | 62:sauce_white_soya_ca                | 62:     | 0%:Milk type taken into account in the updated version                                                                                                |
| White or cream sauce e.g bechamel made with soya milk with no added calcium                                                              | :sauce_white                 | 62:     | 62:sauce_white_soya_noca              | 62:     | 0%:Milk type taken into account in the updated version                                                                                                |
| White or cream sauce e.g bechamel made with whole milk                                                                                   | :sauce_white                 | 62:     | 62:sauce_white_soya_noca              | 62:     | 0%:Milk type taken into account in the updated version                                                                                                |
| Scone, plain, fruit, cheese                                                                                                              | :scone                       | 48:     | 48:scone                              | 48:     | 0%:                                                                                                                                                   |
| Gluten free scone                                                                                                                        |                              |         | :scone_gf                             | 48:     | -:Gluten free version added to the updated version (however no gluten free code available at the time so the non-gluten free code was used)           |
| Single crust pie/flan e.g. quiche                                                                                                        | :single_crust                | 30:     | 30:single_crust                       | 30:     | 0%:                                                                                                                                                   |
| Milk/yogurt based smoothie                                                                                                               | :smoothie_dairy              | 250:    | 250:smoothie_dairy                    | 260:    | 4%:Slight increase in portion size, to be consistent with portion size of fruit smoothie                                                              |
| Fruit based smoothie                                                                                                                     | :smoothie_fruit              | 260:    | 260:smoothie_fruit                    | 260:    | 0%:                                                                                                                                                   |
| Cheesy biscuits e.g Mini Cheddars, Tuc                                                                                                   | :snack_cheesybis             | 40:     | 40:snack_cheesybis                    | 40:     | 0%:                                                                                                                                                   |
| Crisps e.g. Walkers, Sensations, Doritos, Hula Hoops                                                                                     | :snack_crisps                | 40:     | 40:snack_crisps                       | 40:     | 0%:                                                                                                                                                   |
| Olives                                                                                                                                   | :snack_olives                | 50:     | 50:snack_olives                       | 50:     | 0%:                                                                                                                                                   |
| Pot noodle style snack                                                                                                                   | :snackpot                    | 280:    | 280:snackpot                          | 280:    | 0%:                                                                                                                                                   |
| Salted/roasted nuts e.g. almonds, cashews, pistachios                                                                                    | :snack_saltednuts            | 40:     | 40:snack_saltednuts                   | 40:     | 0%:                                                                                                                                                   |
| Peanuts, roasted/salted                                                                                                                  | :snack_saltedpeanuts         | 40:     | 40:snack_saltedpeanuts                | 40:     | 0%:                                                                                                                                                   |
| Savoury crispbread/corn cake snacks e.g. Snack-a-Jack, flavoured Ryvita snack size                                                       | :snack_savourybis            | 40:     | 40:snack_savourybis                   | 40:     | 0%:                                                                                                                                                   |
| Seeds e.g. sunflower, pumpkin, linseeds                                                                                                  | :snack_seeds                 | 14:     | 14:snack_seeds                        | 14:     | 0%:                                                                                                                                                   |
| Other savoury snack e.g bombay mix, monster munch, pretzel, popcorn                                                                      | :snack_svyother              | 40:     | 40:snack_svyother                     | 40:     | 0%:Updated mapping based on free text entered by study participants; nuts removed from mapping                                                        |
| Other sweet snack/bar e.g Go Ahead yogurt breaks, sweet popcorn                                                                          | :snack_swtother              | 40:     | 40:snack_swtother                     | 40:     | 0%:Updated mapping based on free text entered by study participants; croissant removed from mapping                                                   |
| Unsalted nuts e.g. almonds, cashews, walnuts                                                                                             | :snack_unsaltednuts          | 40:     | 40:snack_unsaltednuts                 | 40:     | 0%:                                                                                                                                                   |
| Peanuts, unsalted e.g monkey nuts                                                                                                        | :snack_unsaltedpeanuts       | 40:     | 40:snack_unsaltedpeanuts              | 40:     | 0%:                                                                                                                                                   |

|                                                                                                                                           | McCance and Widdowson's   |              | Nutrient databank + other changes      |              |                                                                                                 |
|-------------------------------------------------------------------------------------------------------------------------------------------|---------------------------|--------------|----------------------------------------|--------------|-------------------------------------------------------------------------------------------------|
| Variable description                                                                                                                      | Food item                 | Portion size | Food item                              | Portion size | Portion diff%                                                                                   |
|                                                                                                                                           |                           |              |                                        |              | Description of differences with previous version                                                |
| Carton, pouch, canned soup with fish/ seafood                                                                                             | :soup_canned_fish         | 220:         | :220:soup_canned_fish                  | 220:         | 0%:                                                                                             |
| Carton, pouch, canned soup with meat/ poultry e.g. ham, chicken                                                                           | :soup_canned_meat         | 220:         | :220:soup_canned_meat                  | 220:         | 0%:                                                                                             |
| Carton, pouch, canned soup, other e.g pea and ham                                                                                         | :soup_canned_other        | 220:         | :220:soup_canned_other                 | 220:         | 0%:                                                                                             |
| Carton, pouch, canned soup with pasta e.g. noodles                                                                                        | :soup_canned_pasta        | 220:         | :220:soup_canned_pasta                 | 220:         | 0%:                                                                                             |
| Carton, pouch, canned soup with peas/ beans/ lentils                                                                                      | :soup_canned_pulse        | 220:         | :220:soup_canned_pulse                 | 220:         | 0%:                                                                                             |
| Carton, pouch, canned soup but not specified the type                                                                                     | :soup_canned_unanswered   | 220:         | :220:soup_canned_unanswered            | 220:         | 0%:                                                                                             |
| Carton, pouch, canned soup with vegetables e.g. potato, tomato                                                                            | :soup_canned_veg          | 220:         | :220:soup_canned_veg                   | 220:         | 0%:                                                                                             |
| Homemade soup with fish/ seafood                                                                                                          | :soup_homemade_fish       | 220:         | :220:soup_homemade_fish                | 220:         | 0%:                                                                                             |
| Homemade soup with meat/ poultry e.g. ham, chicken                                                                                        | :soup_homemade_meat       | 220:         | :220:soup_homemade_meat                | 220:         | 0%:                                                                                             |
| Homemade soup, other e.g pea and ham                                                                                                      | :soup_homemade_other      | 220:         | :220:soup_homemade_other               | 220:         | 0%:                                                                                             |
| Homemade soup with pasta e.g. noodles                                                                                                     | :soup_homemade_pasta      | 220:         | :220:soup_homemade_pasta               | 220:         | 0%:                                                                                             |
| Homemade soup with peas/ beans/ lentils                                                                                                   | :soup_homemade_pulse      | 220:         | :220:soup_homemade_pulse               | 220:         | 0%:                                                                                             |
| Homemade soup but not specified the type                                                                                                  | :soup_homemade_unanswered | 220:         | :220:soup_homemade_unanswered          | 220:         | 0%:                                                                                             |
| Homemade soup with vegetables e.g. potato, tomato                                                                                         | :soup_homemade_veg        | 220:         | :220:soup_homemade_veg                 | 220:         | 0%:                                                                                             |
| Dried/ powdered soup e.g. Cup-a-Soup                                                                                                      | :soup_powder              | 200:         | :200:soup_powder                       | 200:         | 0%:                                                                                             |
| Sponge puddings, plain or with chocolate or fruit sauce                                                                                   | :spongepuds               | 120:         | :120:spongepuds                        | 120:         | 0%:                                                                                             |
| Sponge puddings, plain or with chocolate or fruit sauce                                                                                   |                           |              | :spongepuds_gf                         | 120:         | 0%:                                                                                             |
| Other spread/ sauce/ dip e.g tartar, mint, sweet chilli, indian curry sauce, mustard                                                      | :spreadsauce_other        | 20:          | :20:spreadsauce_other                  | 20:          | 0%:                                                                                             |
| Sushi: sushi rice including seaweed/fish/meat/veg                                                                                         | :sushi                    | 278:         | :278:sushi                             | 278:         | 0%:                                                                                             |
| Sweets: hard and soft, e.g. peppermints, toffees, fudge, fruit flavoured sweets                                                           | :sweets                   | 36:          | :36:sweets                             | 36:          | 0%:                                                                                             |
| Sugar free sweets: hard and soft, e.g. peppermints, toffees, fudge, fruit flavoured sweets                                                | :sweets_diet              | 18:          | :18:sweets_diet                        | 18:          | 0%:                                                                                             |
| Standard tea, black                                                                                                                       | :tea_black                | 190:         | :190:tea_black                         | 190:         | 0%:                                                                                             |
| Standard tea, black, decaffeinated                                                                                                        | :tea_black_decaf          | 190:         | :190:tea_black_decaf                   | 190:         | 0%:                                                                                             |
| Green tea                                                                                                                                 | :tea_green                | 190:         | :190:tea_green                         | 190:         | 0%:                                                                                             |
| Herbal, fruit tea                                                                                                                         | :tea_herbal               | 190:         | :190:tea_herbal                        | 190:         | 0%:                                                                                             |
| Other tea e.g                                                                                                                             | :tea_other                | 190:         | :190:tea_other                         | 190:         | 0%:                                                                                             |
| Rooibos/ Redbush tea                                                                                                                      | :tea_rooibos              | 190:         | :190:tea_rooibos                       | 190:         | 0%:                                                                                             |
| Sugar added to tea                                                                                                                        | :tea_sugar                | 6:           | :6:tea_sugar                           | 6:           | 0%:                                                                                             |
| Veggieburger or vegie sausage                                                                                                             | :vegalt_burger            | 90:          | :90:vegalt_burger                      | 90:          | 0%:                                                                                             |
| Other vegetarian alternative e.g nut roast, falafel                                                                                       | :vegalt_other             | 90:          | :90:vegalt_other                       | 90:          | 0%:                                                                                             |
| Quorn sausage, burger, pieces                                                                                                             | :vegalt_quorn             | 90:          | :90:vegalt_quorn                       | 90:          | 0%:                                                                                             |
| Tofu / tempeh / TVP / soya mince                                                                                                          | :vegalt_tofu              | 90:          | :90:vegalt_tofu                        | 90:          | 0%:                                                                                             |
| Avocado                                                                                                                                   | :veg_avocado              | 136:         | :136:veg_avocado                       | 136:         | 0%:                                                                                             |
| Baked beans                                                                                                                               | :veg_bakedbeans           | 135:         | :135:veg_bakedbeans                    | 135:         | 0%:                                                                                             |
| Beetroot                                                                                                                                  | :veg_beetroot             | 48:          | :48:veg_beetroot                       | 48:          | 0%:                                                                                             |
| Broad beans                                                                                                                               | :veg_broadbeans           | 70:          | :70:veg_broadbeans                     | 70:          | 0%:                                                                                             |
| Broccoli                                                                                                                                  | :veg_broccoli             | 80:          | :80:veg_broccoli                       | 80:          | 0%:                                                                                             |
| Butternut squash                                                                                                                          | :veg_butternut            | 130:         | :130:veg_butternut                     | 130:         | 0%:                                                                                             |
| Cabbage, kale                                                                                                                             | :veg_cabbagekale          | 90:          | :90:veg_cabbagekale                    | 90:          | 0%:                                                                                             |
| Carrots                                                                                                                                   | :veg_carrots              | 60:          | :60:veg_carrots                        | 60:          | 0%:                                                                                             |
| Cauliflower                                                                                                                               | :veg_cauli                | 90:          | :90:veg_cauli                          | 90:          | 0%:                                                                                             |
| Celery                                                                                                                                    | :veg_celery               | 30:          | :30:veg_celery                         | 30:          | 0%:                                                                                             |
| Courgettes cooked with added fat: Fat specified as butter but not specified amount of % fat                                               | :veg_courgette            | 90:          | :90:veg_courgette_butter_dunno         | 90:          | 0%:Fat (2.5%) used for cooking taken into account in the updated version - 50% cooked with fat  |
| Courgettes cooked with added fat: Fat specified as butter, normal amount of % fat                                                         | :veg_courgette            | 90:          | :90:veg_courgette_butter_fat           | 90:          | 0%:Fat (2.5%) used for cooking taken into account in the updated version - 50% cooked with fat  |
| Courgettes cooked with added fat: Fat specified as butter, low fat                                                                        | :veg_courgette            | 90:          | :90:veg_courgette_butter_lowfat        | 90:          | 0%:Fat (2.5%) used for cooking taken into account in the updated version - 50% cooked with fat  |
| Courgettes cooked with added fat: Fat specified as spreadable butter with normal amount of % fat                                          | :veg_courgette            | 90:          | :90:veg_courgette_butter_spread_fat    | 90:          | 0%:Fat (2.5%) used for cooking taken into account in the updated version - 50% cooked with fat  |
| Courgettes cooked with added fat: Fat specified as spreadable butter, low fat                                                             | :veg_courgette            | 90:          | :90:veg_courgette_butter_spread_lowfat | 90:          | 0%:Fat (2.5%) used for cooking taken into account in the updated version - 50% cooked with fat  |
| Courgettes cooked with added fat: Fat specified as not known type of fat or spread                                                        | :veg_courgette            | 90:          | :90:veg_courgette_fat_dunno            | 90:          | 0%:Fat (2.5%) used for cooking taken into account in the updated version - 50% cooked with fat  |
| Courgettes cooked with no added fat                                                                                                       | :veg_courgette            | 90:          | :90:veg_courgette_fat_none             | 90:          | 0%:Fat (2.5%) used for cooking taken into account in the updated version - 50% cooked with fat  |
| Courgettes cooked with added fat: Fat specified as other type of fat or spread e.g ghee, dripping                                         | :veg_courgette            | 90:          | :90:veg_courgette_fat_other            | 90:          | 0%:Fat (2.5%) used for cooking taken into account in the updated version - 50% cooked with fat  |
| Courgettes cooked with added fat: Fat specified as lard                                                                                   | :veg_courgette            | 90:          | :90:veg_courgette_lard                 | 90:          | 0%:Fat (2.5%) used for cooking taken into account in the updated version - 50% cooked with fat  |
| Courgettes cooked with added fat: Fat specified as hard margarine (hard block margarine in wrapper)                                       | :veg_courgette            | 90:          | :90:veg_courgette_marg_hard            | 90:          | 0%:Fat (2.5%) used for cooking taken into account in the updated version - 50% cooked with fat  |
| Courgettes cooked with added fat: Fat specified as polyunsaturated margarine (e.g Flora) and also cholesterol lowering                    | :veg_courgette            | 90:          | :90:veg_courgette_marg_poly_chol       | 90:          | 0%:Fat (2.5%) used for cooking taken into account in the updated version - 50% cooked with fat  |
| Courgettes cooked with added fat: Fat specified as polyunsaturated margarine (e.g Flora) but not specified amount of fat                  | :veg_courgette            | 90:          | :90:veg_courgette_marg_poly_dunno      | 90:          | 0%:Fat (2.5%) used for cooking taken into account in the updated version - 50% cooked with fat  |
| Courgettes cooked with added fat: Fat specified as polyunsaturated margarine (e.g Flora), normal amount of % fat                          | :veg_courgette            | 90:          | :90:veg_courgette_marg_poly_fat        | 90:          | 0%:Fat (2.5%) used for cooking taken into account in the updated version - 50% cooked with fat  |
| Courgettes cooked with added fat: Fat specified as polyunsaturated margarine (e.g Flora), low fat                                         | :veg_courgette            | 90:          | :90:veg_courgette_marg_poly_lowfat     | 90:          | 0%:Fat (2.5%) used for cooking taken into account in the updated version - 50% cooked with fat  |
| Courgettes cooked with added fat: Fat specified as polyunsaturated margarine (e.g Flora), very low fat                                    | :veg_courgette            | 90:          | :90:veg_courgette_marg_poly_vlowfat    | 90:          | 0%:Fat (2.5%) used for cooking taken into account in the updated version - 50% cooked with fat  |
| Courgettes cooked with added fat: Fat specified as soya/vegan/dairy free margarine e.g Pure, and also cholesterol lowering                | :veg_courgette            | 90:          | :90:veg_courgette_marg_soya_chol       | 90:          | 0%:Fat (2.5%) used for cooking taken into account in the updated version - 50% cooked with fat  |
| Courgettes cooked with added fat: Fat specified as soya/vegan/dairy free margarine e.g Pure, and not specified amount of fat              | :veg_courgette            | 90:          | :90:veg_courgette_marg_soya_dunno      | 90:          | 0%:Fat (2.5%) used for cooking taken into account in the updated version - 50% cooked with fat  |
| Courgettes cooked with added fat: Fat specified as soya/vegan/dairy free margarine (e.g Pure), normal amount % fat                        | :veg_courgette            | 90:          | :90:veg_courgette_marg_soya_fat        | 90:          | 0%:Fat (2.5%) used for cooking taken into account in the updated version - 50% cooked with fat  |
| Courgettes cooked with added fat: Fat specified as soya/vegan/dairy free margarine (e.g Pure), low fat                                    | :veg_courgette            | 90:          | :90:veg_courgette_marg_soya_lowfat     | 90:          | 0%:Fat (2.5%) used for cooking taken into account in the updated version - 50% cooked with fat  |
| Courgettes cooked with added fat: Fat specified as soya/vegan/dairy free margarine (e.g Pure), very low fat                               | :veg_courgette            | 90:          | :90:veg_courgette_marg_soya_vlowfat    | 90:          | 0%:Fat (2.5%) used for cooking taken into account in the updated version - 50% cooked with fat  |
| Courgettes cooked with added fat: Fat specified as olive oil                                                                              | :veg_courgette            | 90:          | :90:veg_courgette_oil_olive            | 90:          | 0%:Fat (2.5%) used for cooking taken into account in the updated version - 50% cooked with fat  |
| Courgettes cooked with added fat: Fat specified as other oil e.g corn, groundnut, rice bran oil                                           | :veg_courgette            | 90:          | :90:veg_courgette_oil_other            | 90:          | 0%:Fat (2.5%) used for cooking taken into account in the updated version - 50% cooked with fat  |
| Courgettes cooked with added fat: Fat specified as rapeseed oil                                                                           | :veg_courgette            | 90:          | :90:veg_courgette_oil_rapeseed         | 90:          | 0%:Fat (2.5%) used for cooking taken into account in the updated version - 50% cooked with fat  |
| Courgettes cooked with added fat: Fat specified as sunflower oil                                                                          | :veg_courgette            | 90:          | :90:veg_courgette_oil_sunflower        | 90:          | 0%:Fat (2.5%) used for cooking taken into account in the updated version - 50% cooked with fat  |
| Courgettes cooked with added fat: Fat specified as vegetable oil                                                                          | :veg_courgette            | 90:          | :90:veg_courgette_oil_veg              | 90:          | 0%:Fat (2.5%) used for cooking taken into account in the updated version - 50% cooked with fat  |
| Courgettes cooked with added fat: Fat specified as dairy spread which is also cholesterol lowering e.g Benecol Buttery                    | :veg_courgette            | 90:          | :90:veg_courgette_spread_dairy_chol    | 90:          | 0%:Fat (2.5%) used for cooking taken into account in the updated version - 50% cooked with fat  |
| Courgettes cooked with added fat: Fat specified as dairy spread but not specified amount of % fat                                         | :veg_courgette            | 90:          | :90:veg_courgette_spread_dairy_dunno   | 90:          | 0%:Fat (2.5%) used for cooking taken into account in the updated version - 50% cooked with fat  |
| Courgettes cooked with added fat: Fat specified as dairy spread with normal amount of % fat                                               | :veg_courgette            | 90:          | :90:veg_courgette_spread_dairy_fat     | 90:          | 0%:Fat (2.5%) used for cooking taken into account in the updated version - 50% cooked with fat  |
| Courgettes cooked with added fat: Fat specified as dairy spread, low fat                                                                  | :veg_courgette            | 90:          | :90:veg_courgette_spread_dairy_lowfat  | 90:          | 0%:Fat (2.5%) used for cooking taken into account in the updated version - 50% cooked with fat  |
| Courgettes cooked with added fat: Fat specified as dairy spread, very low fat                                                             | :veg_courgette            | 90:          | :90:veg_courgette_spread_dairy_vlowfat | 90:          | 0%:Fat (2.5%) used for cooking taken into account in the updated version - 50% cooked with fat  |
| Courgettes cooked with added fat: Fat specified as not known type of spread but ticked cholesterol lowering e.g Benecol, Flora pro active | :veg_courgette            | 90:          | :90:veg_courgette_spread_dunno_chol    | 90:          | 0%:Fat (2.5%) used for cooking taken into account in the updated version - 50% cooked with fat  |
| Courgettes cooked with added fat: Fat specified as not known type of spread or amount of % fat                                            | :veg_courgette            | 90:          | :90:veg_courgette_spread_dunno_dunno   | 90:          | 0%:Fat (2.5%) used for cooking taken into account in the updated version - 50% cooked with fat  |
| Courgettes cooked with added fat: Fat specified as not known type of spread but ticked normal amount % fat                                | :veg_courgette            | 90:          | :90:veg_courgette_spread_dunno_fat     | 90:          | 0%:Fat (2.5%) used for cooking taken into account in the updated version - 50% cooked with fat  |
| Courgettes cooked with added fat: Fat specified as not known type of spread but ticked low fat                                            | :veg_courgette            | 90:          | :90:veg_courgette_spread_dunno_lowfat  | 90:          | 0%:Fat (2.5%) used for cooking taken into account in the updated version - 50% cooked with fat  |
| Courgettes cooked with added fat: Fat specified as not known type of spread but ticked very low fat                                       | :veg_courgette            | 90:          | :90:veg_courgette_spread_dunno_vlowfat | 90:          | 0%:Fat (2.5%) used for cooking taken into account in the updated version - 50% cooked with fat  |
| Courgettes cooked with added fat: Fat specified as cholesterol lowering olive spread e.g Benecol/Flora pro active olive spread            | :veg_courgette            | 90:          | :90:veg_courgette_spread_olive_chol    | 90:          | 0%:Fat (2.5%) used for cooking taken into account in the updated version - 50% cooked with fat  |
| Courgettes cooked with added fat: Fat specified as olive spread but not specified amount of fat                                           | :veg_courgette            | 90:          | :90:veg_courgette_spread_olive_dunno   | 90:          | 0%:Fat (2.5%) used for cooking taken into account in the updated version - 50% cooked with fat  |
| Courgettes cooked with added fat: Fat specified as olive spread with normal amount of % fat                                               | :veg_courgette            | 90:          | :90:veg_courgette_spread_olive_fat     | 90:          | 0%:Fat (2.5%) used for cooking taken into account in the updated version - 50% cooked with fat  |
| Courgettes cooked with added fat: Fat specified as olive spread, low fat                                                                  | :veg_courgette            | 90:          | :90:veg_courgette_spread_olive_lowfat  | 90:          | 0%:Fat (2.5%) used for cooking taken into account in the updated version - 50% cooked with fat  |
| Courgettes cooked with added fat: Fat specified as olive spread, very low fat                                                             | :veg_courgette            | 90:          | :90:veg_courgette_spread_olive_vlowfat | 90:          | 0%:Fat (2.5%) used for cooking taken into account in the updated version - 50% cooked with fat  |
| Cucumber                                                                                                                                  | :veg_cucumber             | 60:          | :60:veg_cucumber                       | 60:          | 0%:                                                                                             |
| Garlic                                                                                                                                    | :veg_garlic               | 5:           | :5:veg_garlic                          | 5:           | 0%:                                                                                             |
| Green beans, french beans, runner beans                                                                                                   | :veg_greenbeans           | 70:          | :70:veg_greenbeans                     | 70:          | 0%:                                                                                             |
| Leeks cooked with added fat: Fat specified as butter but not specified amount of % fat                                                    | :veg_leek                 | 80:          | :80:veg_leek_butter_dunno              | 80:          | 0%:Fat (1.25%) used for cooking taken into account in the updated version - 25% cooked with fat |
| Leeks cooked with added fat: Fat specified as butter, normal amount of % fat                                                              | :veg_leek                 | 80:          | :80:veg_leek_butter_fat                | 80:          | 0%:Fat (1.25%) used for cooking taken into account in the updated version - 25% cooked with fat |
| Leeks cooked with added fat: Fat specified as butter, low fat                                                                             | :veg_leek                 | 80:          | :80:veg_leek_butter_lowfat             | 80:          | 0%:Fat (1.25%) used for cooking taken into account in the updated version - 25% cooked with fat |
| Leeks cooked with added fat: Fat specified as spreadable butter with normal amount of % fat                                               | :veg_leek                 | 80:          | :80:veg_leek_butter_spread_fat         | 80:          | 0%:Fat (1.25%) used for cooking taken into account in the updated version - 25% cooked with fat |
| Leeks cooked with added fat: Fat specified as spreadable butter, low fat                                                                  | :veg_leek                 | 80:          | :80:veg_leek_butter_spread_lowfat      | 80:          | 0%:Fat (1.25%) used for cooking taken into account in the updated version - 25% cooked with fat |
| Leeks cooked with added fat: Fat specified as not known type of fat or spread                                                             | :veg_leek                 | 80:          | :80:veg_leek_fat_dunno                 | 80:          | 0%:Fat (1.25%) used for cooking taken into account in the updated version - 25% cooked with fat |
| Leeks cooked with no added fat                                                                                                            | :veg_leek                 | 80:          | :80:veg_leek_fat_none                  | 80:          | 0%:Fat (1.25%) used for cooking taken into account in the updated version - 25% cooked with fat |
| Leeks cooked with added fat: Fat specified as other type of fat or spread e.g ghee, dripping                                              | :veg_leek                 | 80:          | :80:veg_leek_fat_other                 | 80:          | 0%:Fat (1.25%) used for cooking taken into account in the updated version - 25% cooked with fat |
| Leeks cooked with added fat: Fat specified as lard                                                                                        | :veg_leek                 | 80:          | :80:veg_leek_lard                      | 80:          | 0%:Fat (1.25%) used for cooking taken into account in the updated version - 25% cooked with fat |
| Leeks cooked with added fat: Fat specified as hard margarine (hard block margarine in wrapper)                                            | :veg_leek                 | 80:          | :80:veg_leek_marg_hard                 | 80:          | 0%:Fat (1.25%) used for cooking taken into account in the updated version - 25% cooked with fat |
| Leeks cooked with added fat: Fat specified as polyunsaturated margarine (e.g Flora) and also cholesterol lowering                         | :veg_leek                 | 80:          | :80:veg_leek_marg_poly_chol            | 80:          | 0%:Fat (1.25%) used for cooking taken into account in the updated version - 25% cooked with fat |
| Leeks cooked with added fat: Fat specified as polyunsaturated margarine (e.g Flora) but not specified amount of fat                       | :veg_leek                 | 80:          | :80:veg_leek_marg_poly_dunno           | 80:          | 0%:Fat (1.25%) used for cooking taken into account in the updated version - 25% cooked with fat |
| Leeks cooked with added fat: Fat specified as polyunsaturated margarine (e.g Flora), normal amount of % fat                               | :veg_leek                 | 80:          | :80:veg_leek_marg_poly_fat             | 80:          | 0%:Fat (1.25%) used for cooking taken into account in the updated version - 25% cooked with fat |
| Leeks cooked with added fat: Fat specified as polyunsaturated margarine (e.g Flora), low fat                                              | :veg_leek                 | 80:          | :80:veg_leek_marg_poly_lowfat          | 80:          | 0%:Fat (1.25%) used for cooking taken into account in the updated version - 25% cooked with fat |
| Leeks cooked with added fat: Fat specified as polyunsaturated margarine (e.g Flora), very low fat                                         | :veg_leek                 | 80:          | :80:veg_leek_marg_poly_vlowfat         | 80:          | 0%:Fat (1.25%) used for cooking taken into account in the updated version - 25% cooked with fat |
| Leeks cooked with added fat: Fat specified as soya/vegan/dairy free margarine e.g Pure, and also cholesterol lowering                     | :veg_leek                 | 80:          | :80:veg_leek_marg_soya_chol            | 80:          | 0%:Fat (1.25%) used for cooking taken into account in the updated version - 25% cooked with fat |
| Leeks cooked with added fat: Fat specified as soya/vegan/dairy free margarine e.g Pure, and not specified amount of fat                   | :veg_leek                 | 80:          | :80:veg_leek_marg_soya_dunno           | 80:          | 0%:Fat (1.25%) used for cooking taken into account in the updated version - 25% cooked with fat |
| Leeks cooked with added fat: Fat specified as soya/vegan/dairy free margarine (e.g Pure), normal amount % fat                             | :veg_leek                 | 80:          | :80:veg_leek_marg_soya_fat             | 80:          | 0%:Fat (1.25%) used for cooking taken into account in the updated version - 25% cooked with fat |
| Leeks cooked with added fat: Fat specified as soya/vegan/dairy free margarine (e.g Pure), low fat                                         | :veg_leek                 | 80:          | :80:veg_leek_marg_soya_lowfat          | 80:          | 0%:Fat (1.25%) used for cooking taken into account in the updated version - 25% cooked with fat |
| Leeks cooked with added fat: Fat specified as soya/vegan/dairy free margarine (e.g Pure), very low fat                                    | :veg_leek                 | 80:          | :80:veg_leek_marg_soya_vlowfat         | 80:          | 0%:Fat (1.25%) used for cooking taken into account in the updated version - 25% cooked with fat |
| Leeks cooked with added fat: Fat specified as olive oil                                                                                   | :veg_leek                 | 80:          | :80:veg_leek_oil_olive                 | 80:          | 0%:Fat (1.25%) used for cooking taken into account in the updated version - 25% cooked with fat |
| Leeks cooked with added fat: Fat specified as other oil e.g corn, groundnut, rice bran oil                                                | :veg_leek                 | 80:          | :80:veg_leek_oil_other                 | 80:          | 0%:Fat (1.25%) used for cooking taken into account in the updated version - 25% cooked with fat |
| Leeks cooked with added fat: Fat specified as rapeseed oil                                                                                | :veg_leek                 | 80:          | :80:veg_leek_oil_rapeseed              | 80:          | 0%:Fat (1.25%) used for cooking taken into account in the updated version - 25% cooked with fat |
| Leeks cooked with added fat: Fat specified as sunflower oil                                                                               | :veg_leek                 | 80:          | :80:veg_leek_oil_sunflower             | 80:          | 0%:Fat (1.25%) used for cooking taken into account in the updated version - 25% cooked with fat |

|                                                                                                                                           | McCance and Widdowson's | Portion: | Nutrient databank + other changes    | Portion: | Portion:                                                                                                      |
|-------------------------------------------------------------------------------------------------------------------------------------------|-------------------------|----------|--------------------------------------|----------|---------------------------------------------------------------------------------------------------------------|
| Variable description                                                                                                                      | Food item               | size:    | Food item                            | size:    | diff%:Description of differences with previous version                                                        |
| Leeks cooked with added fat: Fat specified as vegetable oil                                                                               | veg_leek                | 80:      | 80:veg_leek_oil_veg                  | 80:      | 0%:Fat (1.25%) used for cooking taken into account in the updated version - 25% cooked with fat               |
| Leeks cooked with added fat: Fat specified as dairy spread which is also cholesterol lowering e.g Benecol Buttery                         | veg_leek                | 80:      | 80:veg_leek_spread_dairy_chol        | 80:      | 0%:Fat (1.25%) used for cooking taken into account in the updated version - 25% cooked with fat               |
| Leeks cooked with added fat: Fat specified as dairy spread but not specified amount of % fat                                              | veg_leek                | 80:      | 80:veg_leek_spread_dairy_dunno       | 80:      | 0%:Fat (1.25%) used for cooking taken into account in the updated version - 25% cooked with fat               |
| Leeks cooked with added fat: Fat specified as dairy spread with normal amount of % fat                                                    | veg_leek                | 80:      | 80:veg_leek_spread_dairy_fat         | 80:      | 0%:Fat (1.25%) used for cooking taken into account in the updated version - 25% cooked with fat               |
| Leeks cooked with added fat: Fat specified as dairy spread, low fat                                                                       | veg_leek                | 80:      | 80:veg_leek_spread_dairy_lowfat      | 80:      | 0%:Fat (1.25%) used for cooking taken into account in the updated version - 25% cooked with fat               |
| Leeks cooked with added fat: Fat specified as dairy spread, very low fat                                                                  | veg_leek                | 80:      | 80:veg_leek_spread_dairy_vlowfat     | 80:      | 0%:Fat (1.25%) used for cooking taken into account in the updated version - 25% cooked with fat               |
| Leeks cooked with added fat: Fat specified as not known type of spread but ticked cholesterol lowering e.g Benecol, Flora pro active      | veg_leek                | 80:      | 80:veg_leek_spread_dunno_chol        | 80:      | 0%:Fat (1.25%) used for cooking taken into account in the updated version - 25% cooked with fat               |
| Leeks cooked with added fat: Fat specified as not known type of spread or amount of % fat                                                 | veg_leek                | 80:      | 80:veg_leek_spread_dunno_dunno       | 80:      | 0%:Fat (1.25%) used for cooking taken into account in the updated version - 25% cooked with fat               |
| Leeks cooked with added fat: Fat specified as not known type of spread but ticked normal amount % fat                                     | veg_leek                | 80:      | 80:veg_leek_spread_dunno_fat         | 80:      | 0%:Fat (1.25%) used for cooking taken into account in the updated version - 25% cooked with fat               |
| Leeks cooked with added fat: Fat specified as not known type of spread but ticked low fat                                                 | veg_leek                | 80:      | 80:veg_leek_spread_dunno_lowfat      | 80:      | 0%:Fat (1.25%) used for cooking taken into account in the updated version - 25% cooked with fat               |
| Leeks cooked with added fat: Fat specified as not known type of spread but ticked very low fat                                            | veg_leek                | 80:      | 80:veg_leek_spread_dunno_vlowfat     | 80:      | 0%:Fat (1.25%) used for cooking taken into account in the updated version - 25% cooked with fat               |
| Leeks cooked with added fat: Fat specified as cholesterol lowering olive spread e.g Benecol/Flora pro active olive spread                 | veg_leek                | 80:      | 80:veg_leek_spread_olive_chol        | 80:      | 0%:Fat (1.25%) used for cooking taken into account in the updated version - 25% cooked with fat               |
| Leeks cooked with added fat: Fat specified as olive spread but not specified amount of fat                                                | veg_leek                | 80:      | 80:veg_leek_spread_olive_dunno       | 80:      | 0%:Fat (1.25%) used for cooking taken into account in the updated version - 25% cooked with fat               |
| Leeks cooked with added fat: Fat specified as olive spread with normal amount of % fat                                                    | veg_leek                | 80:      | 80:veg_leek_spread_olive_fat         | 80:      | 0%:Fat (1.25%) used for cooking taken into account in the updated version - 25% cooked with fat               |
| Leeks cooked with added fat: Fat specified as olive spread, low fat                                                                       | veg_leek                | 80:      | 80:veg_leek_spread_olive_lowfat      | 80:      | 0%:Fat (1.25%) used for cooking taken into account in the updated version - 25% cooked with fat               |
| Leeks cooked with added fat: Fat specified as olive spread, very low fat                                                                  | veg_leek                | 80:      | 80:veg_leek_spread_olive_vlowfat     | 80:      | 0%:Fat (1.25%) used for cooking taken into account in the updated version - 25% cooked with fat               |
| Lettuce                                                                                                                                   | veg_lettuce             | 35:      | 35:veg_lettuce                       | 35:      | 0%:                                                                                                           |
| Mixed vegetables                                                                                                                          | veg_mixed               | 90:      | 90:veg_mixed                         | 90:      | 0%:                                                                                                           |
| Mixed veg cooked or stir fried with added fat: Fat specified as butter but not specified amount of % fat                                  | veg_mixtures            | 90:      | 90:veg_mixtures_butter_dunno         | 90:      | 0%:Fat (5%) used for cooking taken into account in the updated version; mapping changed to stirfry vegetables |
| Mixed veg cooked or stir fried with added fat: Fat specified as butter, normal amount of % fat                                            | veg_mixtures            | 90:      | 90:veg_mixtures_butter_fat           | 90:      | 0%:Fat (5%) used for cooking taken into account in the updated version; mapping changed to stirfry vegetables |
| Mixed veg cooked or stir fried with added fat: Fat specified as butter, low fat                                                           | veg_mixtures            | 90:      | 90:veg_mixtures_butter_lowfat        | 90:      | 0%:Fat (5%) used for cooking taken into account in the updated version; mapping changed to stirfry vegetables |
| Mixed veg cooked or stir fried with added fat: Fat specified as spreadable butter with normal amount of % fat                             | veg_mixtures            | 90:      | 90:veg_mixtures_butter_spread_fat    | 90:      | 0%:Fat (5%) used for cooking taken into account in the updated version; mapping changed to stirfry vegetables |
| Mixed veg cooked or stir fried with added fat: Fat specified as spreadable butter, low fat                                                | veg_mixtures            | 90:      | 90:veg_mixtures_butter_spread_lowfat | 90:      | 0%:Fat (5%) used for cooking taken into account in the updated version; mapping changed to stirfry vegetables |
| Mixed veg cooked or stir fried with added fat: Fat specified as not known type of fat or spread                                           | veg_mixtures            | 90:      | 90:veg_mixtures_fat_dunno            | 90:      | 0%:Fat (5%) used for cooking taken into account in the updated version; mapping changed to stirfry vegetables |
| Mixed veg cooked or stir fried with no added fat                                                                                          | veg_mixtures            | 90:      | 90:veg_mixtures_fat_none             | 90:      | 0%:Fat (5%) used for cooking taken into account in the updated version; mapping changed to stirfry vegetables |
| Mixed veg cooked or stir fried with added fat: Fat specified as other type of fat or spread e.g ghee, dripping                            | veg_mixtures            | 90:      | 90:veg_mixtures_fat_other            | 90:      | 0%:Fat (5%) used for cooking taken into account in the updated version; mapping changed to stirfry vegetables |
| Mixed veg cooked or stir fried with added fat: Fat specified as lard                                                                      | veg_mixtures            | 90:      | 90:veg_mixtures_lard                 | 90:      | 0%:Fat (5%) used for cooking taken into account in the updated version; mapping changed to stirfry vegetables |
| Mixed veg cooked or stir fried with added fat: Fat specified as hard margarine (hard block margarine in wrapper)                          | veg_mixtures            | 90:      | 90:veg_mixtures_marg_hard            | 90:      | 0%:Fat (5%) used for cooking taken into account in the updated version; mapping changed to stirfry vegetables |
| Mixed veg cooked or stir fried with added fat: Fat specified as polyunsaturated margarine (e.g Flora) and also cholesterol lowering       | veg_mixtures            | 90:      | 90:veg_mixtures_marg_poly_chol       | 90:      | 0%:Fat (5%) used for cooking taken into account in the updated version; mapping changed to stirfry vegetables |
| Mixed veg cooked or stir fried with added fat: Fat specified as polyunsaturated margarine (e.g Flora) but not specified amount of fat     | veg_mixtures            | 90:      | 90:veg_mixtures_marg_poly_dunno      | 90:      | 0%:Fat (5%) used for cooking taken into account in the updated version; mapping changed to stirfry vegetables |
| Mixed veg cooked or stir fried with added fat: Fat specified as polyunsaturated margarine (e.g Flora), normal amount of % fat             | veg_mixtures            | 90:      | 90:veg_mixtures_marg_poly_fat        | 90:      | 0%:Fat (5%) used for cooking taken into account in the updated version; mapping changed to stirfry vegetables |
| Mixed veg cooked or stir fried with added fat: Fat specified as polyunsaturated margarine (e.g Flora), low fat                            | veg_mixtures            | 90:      | 90:veg_mixtures_marg_poly_lowfat     | 90:      | 0%:Fat (5%) used for cooking taken into account in the updated version; mapping changed to stirfry vegetables |
| Mixed veg cooked or stir fried with added fat: Fat specified as polyunsaturated margarine (e.g Flora), very low fat                       | veg_mixtures            | 90:      | 90:veg_mixtures_marg_poly_vlowfat    | 90:      | 0%:Fat (5%) used for cooking taken into account in the updated version; mapping changed to stirfry vegetables |
| Mixed veg cooked or stir fried with added fat: Fat specified as soya/vegan/dairy free margarine e.g Pure, and also cholesterol lowering   | veg_mixtures            | 90:      | 90:veg_mixtures_marg_soya_chol       | 90:      | 0%:Fat (5%) used for cooking taken into account in the updated version; mapping changed to stirfry vegetables |
| Mixed veg cooked or stir fried with added fat: Fat specified as soya/vegan/dairy free margarine e.g Pure, and not specified amount of fat | veg_mixtures            | 90:      | 90:veg_mixtures_marg_soya_dunno      | 90:      | 0%:Fat (5%) used for cooking taken into account in the updated version; mapping changed to stirfry vegetables |
| Mixed veg cooked or stir fried with added fat: Fat specified as soya/vegan/dairy free margarine (e.g Pure), normal amount % fat           | veg_mixtures            | 90:      | 90:veg_mixtures_marg_soya_fat        | 90:      | 0%:Fat (5%) used for cooking taken into account in the updated version; mapping changed to stirfry vegetables |
| Mixed veg cooked or stir fried with added fat: Fat specified as soya/vegan/dairy free margarine (e.g Pure), low fat                       | veg_mixtures            | 90:      | 90:veg_mixtures_marg_soya_lowfat     | 90:      | 0%:Fat (5%) used for cooking taken into account in the updated version; mapping changed to stirfry vegetables |
| Mixed veg cooked or stir fried with added fat: Fat specified as soya/vegan/dairy free margarine (e.g Pure), very low fat                  | veg_mixtures            | 90:      | 90:veg_mixtures_marg_soya_vlowfat    | 90:      | 0%:Fat (5%) used for cooking taken into account in the updated version; mapping changed to stirfry vegetables |
| Mixed veg cooked or stir fried with added fat: Fat specified as olive oil                                                                 | veg_mixtures            | 90:      | 90:veg_mixtures_oil_olive            | 90:      | 0%:Fat (5%) used for cooking taken into account in the updated version; mapping changed to stirfry vegetables |
| Mixed veg cooked or stir fried with added fat: Fat specified as other oil e.g corn, groundnut, rice bran oil                              | veg_mixtures            | 90:      | 90:veg_mixtures_oil_other            | 90:      | 0%:Fat (5%) used for cooking taken into account in the updated version; mapping changed to stirfry vegetables |
| Mixed veg cooked or stir fried with added fat: Fat specified as rapeseed oil                                                              | veg_mixtures            | 90:      | 90:veg_mixtures_oil_rapeseed         | 90:      | 0%:                                                                                                           |

[illegible]

|                                                                                                                                                | McCance and Widdowson's | Nutrient databank + other changes        |              |                                                                                                                                              |
|------------------------------------------------------------------------------------------------------------------------------------------------|-------------------------|------------------------------------------|--------------|----------------------------------------------------------------------------------------------------------------------------------------------|
|                                                                                                                                                | Portion size            | Portion size                             | Portion size | Portion diff%                                                                                                                                |
| Variable description                                                                                                                           | Food item               | Food item                                |              | Description of differences with previous version                                                                                             |
| Garden peas, frozen or canned                                                                                                                  | :veg_peas               | 65:veg_peas                              | 65:          | 0%:                                                                                                                                          |
| Peppers (sweet) cooked with added fat: Fat specified as butter but not specified amount of % fat                                               | :veg_pepper_bell        | 160:veg_pepper_bell_butter_dunno         | 133:         | -17%:Fat (2.5%) used for cooking taken into account in the updated version - 50% cooked with fat + portion weight now excludes inedible part |
| Peppers (sweet) cooked with added fat: Fat specified as butter, normal amount of % fat                                                         | :veg_pepper_bell        | 160:veg_pepper_bell_butter_fat           | 133:         | -17%:Fat (2.5%) used for cooking taken into account in the updated version - 50% cooked with fat + portion weight now excludes inedible part |
| Peppers (sweet) cooked with added fat: Fat specified as butter, low fat                                                                        | :veg_pepper_bell        | 160:veg_pepper_bell_butter_lowfat        | 133:         | -17%:Fat (2.5%) used for cooking taken into account in the updated version - 50% cooked with fat + portion weight now excludes inedible part |
| Peppers (sweet) cooked with added fat: Fat specified as spreadable butter with normal amount of % fat                                          | :veg_pepper_bell        | 160:veg_pepper_bell_butter_spread_fat    | 133:         | -17%:Fat (2.5%) used for cooking taken into account in the updated version - 50% cooked with fat + portion weight now excludes inedible part |
| Peppers (sweet) cooked with added fat: Fat specified as spreadable butter, low fat                                                             | :veg_pepper_bell        | 160:veg_pepper_bell_butter_spread_lowfat | 133:         | -17%:Fat (2.5%) used for cooking taken into account in the updated version - 50% cooked with fat + portion weight now excludes inedible part |
| Peppers (sweet) cooked with added fat: Fat specified as not known type of fat or spread                                                        | :veg_pepper_bell        | 160:veg_pepper_bell_fat_dunno            | 133:         | -17%:Fat (2.5%) used for cooking taken into account in the updated version - 50% cooked with fat + portion weight now excludes inedible part |
| Peppers (sweet) cooked with no added fat                                                                                                       | :veg_pepper_bell        | 160:veg_pepper_bell_fat_none             | 133:         | -17%:Fat (2.5%) used for cooking taken into account in the updated version - 50% cooked with fat + portion weight now excludes inedible part |
| Peppers (sweet) cooked with added fat: Fat specified as other type of fat or spread e.g ghee, dripping                                         | :veg_pepper_bell        | 160:veg_pepper_bell_fat_other            | 133:         | -17%:Fat (2.5%) used for cooking taken into account in the updated version - 50% cooked with fat + portion weight now excludes inedible part |
| Peppers (sweet) cooked with added fat: Fat specified as lard                                                                                   | :veg_pepper_bell        | 160:veg_pepper_bell_lard                 | 133:         | -17%:Fat (2.5%) used for cooking taken into account in the updated version - 50% cooked with fat + portion weight now excludes inedible part |
| Peppers (sweet) cooked with added fat: Fat specified as hard margarine (hard block margarine in wrapper)                                       | :veg_pepper_bell        | 160:veg_pepper_bell_marg_hard            | 133:         | -17%:Fat (2.5%) used for cooking taken into account in the updated version - 50% cooked with fat + portion weight now excludes inedible part |
| Peppers (sweet) cooked with added fat: Fat specified as polyunsaturated margarine (e.g Flora) and also cholesterol lowering                    | :veg_pepper_bell        | 160:veg_pepper_bell_marg_poly_chol       | 133:         | -17%:Fat (2.5%) used for cooking taken into account in the updated version - 50% cooked with fat + portion weight now excludes inedible part |
| Peppers (sweet) cooked with added fat: Fat specified as polyunsaturated margarine (e.g Flora) but not specified amount of fat                  | :veg_pepper_bell        | 160:veg_pepper_bell_marg_poly_dunno      | 133:         | -17%:Fat (2.5%) used for cooking taken into account in the updated version - 50% cooked with fat + portion weight now excludes inedible part |
| Peppers (sweet) cooked with added fat: Fat specified as polyunsaturated margarine (e.g Flora), normal amount of % fat                          | :veg_pepper_bell        | 160:veg_pepper_bell_marg_poly_fat        | 133:         | -17%:Fat (2.5%) used for cooking taken into account in the updated version - 50% cooked with fat + portion weight now excludes inedible part |
| Peppers (sweet) cooked with added fat: Fat specified as polyunsaturated margarine (e.g Flora), low fat                                         | :veg_pepper_bell        | 160:veg_pepper_bell_marg_poly_lowfat     | 133:         | -17%:Fat (2.5%) used for cooking taken into account in the updated version - 50% cooked with fat + portion weight now excludes inedible part |
| Peppers (sweet) cooked with added fat: Fat specified as polyunsaturated margarine (e.g Flora), very low fat                                    | :veg_pepper_bell        | 160:veg_pepper_bell_marg_poly_vlowfat    | 133:         | -17%:Fat (2.5%) used for cooking taken into account in the updated version - 50% cooked with fat + portion weight now excludes inedible part |
| Peppers (sweet) cooked with added fat: Fat specified as soya/vegan/dairy free margarine e.g Pure, and also cholesterol lowering                | :veg_pepper_bell        | 160:veg_pepper_bell_marg_soya_chol       | 133:         | -17%:Fat (2.5%) used for cooking taken into account in the updated version - 50% cooked with fat + portion weight now excludes inedible part |
| Peppers (sweet) cooked with added fat: Fat specified as soya/vegan/dairy free margarine e.g Pure, and not specified amount of fat              | :veg_pepper_bell        | 160:veg_pepper_bell_marg_soya_dunno      | 133:         | -17%:Fat (2.5%) used for cooking taken into account in the updated version - 50% cooked with fat + portion weight now excludes inedible part |
| Peppers (sweet) cooked with added fat: Fat specified as soya/vegan/dairy free margarine (e.g Pure), normal amount % fat                        | :veg_pepper_bell        | 160:veg_pepper_bell_marg_soya_fat        | 133:         | -17%:Fat (2.5%) used for cooking taken into account in the updated version - 50% cooked with fat + portion weight now excludes inedible part |
| Peppers (sweet) cooked with added fat: Fat specified as soya/vegan/dairy free margarine (e.g Pure), low fat                                    | :veg_pepper_bell        | 160:veg_pepper_bell_marg_soya_lowfat     | 133:         | -17%:Fat (2.5%) used for cooking taken into account in the updated version - 50% cooked with fat + portion weight now excludes inedible part |
| Peppers (sweet) cooked with added fat: Fat specified as soya/vegan/dairy free margarine (e.g Pure), very low fat                               | :veg_pepper_bell        | 160:veg_pepper_bell_marg_soya_vlowfat    | 133:         | -17%:Fat (2.5%) used for cooking taken into account in the updated version - 50% cooked with fat + portion weight now excludes inedible part |
| Peppers (sweet) cooked with added fat: Fat specified as olive oil                                                                              | :veg_pepper_bell        | 160:veg_pepper_bell_oil_olive            | 133:         | -17%:Fat (2.5%) used for cooking taken into account in the updated version - 50% cooked with fat + portion weight now excludes inedible part |
| Peppers (sweet) cooked with added fat: Fat specified as other oil e.g corn, groundnut, rice bran oil                                           | :veg_pepper_bell        | 160:veg_pepper_bell_oil_other            | 133:         | -17%:Fat (2.5%) used for cooking taken into account in the updated version - 50% cooked with fat + portion weight now excludes inedible part |
| Peppers (sweet) cooked with added fat: Fat specified as rapeseed oil                                                                           | :veg_pepper_bell        | 160:veg_pepper_bell_oil_rapeseed         | 133:         | -17%:Fat (2.5%) used for cooking taken into account in the updated version - 50% cooked with fat + portion weight now excludes inedible part |
| Peppers (sweet) cooked with added fat: Fat specified as sunflower oil                                                                          | :veg_pepper_bell        | 160:veg_pepper_bell_oil_sunflower        | 133:         | -17%:Fat (2.5%) used for cooking taken into account in the updated version - 50% cooked with fat + portion weight now excludes inedible part |
| Peppers (sweet) cooked with added fat: Fat specified as vegetable oil                                                                          | :veg_pepper_bell        | 160:veg_pepper_bell_oil_veg              | 133:         | -17%:Fat (2.5%) used for cooking taken into account in the updated version - 50% cooked with fat + portion weight now excludes inedible part |
| Peppers (sweet) cooked with added fat: Fat specified as dairy spread which is also cholesterol lowering e.g Benecol Buttery                    | :veg_pepper_bell        | 160:veg_pepper_bell_spread_dairy_chol    | 133:         | -17%:Fat (2.5%) used for cooking taken into account in the updated version - 50% cooked with fat + portion weight now excludes inedible part |
| Peppers (sweet) cooked with added fat: Fat specified as dairy spread but not specified amount of % fat                                         | :veg_pepper_bell        | 160:veg_pepper_bell_spread_dairy_dunno   | 133:         | -17%:Fat (2.5%) used for cooking taken into account in the updated version - 50% cooked with fat + portion weight now excludes inedible part |
| Peppers (sweet) cooked with added fat: Fat specified as dairy spread with normal amount of % fat                                               | :veg_pepper_bell        | 160:veg_pepper_bell_spread_dairy_fat     | 133:         | -17%:Fat (2.5%) used for cooking taken into account in the updated version - 50% cooked with fat + portion weight now excludes inedible part |
| Peppers (sweet) cooked with added fat: Fat specified as dairy spread, low fat                                                                  | :veg_pepper_bell        | 160:veg_pepper_bell_spread_dairy_lowfat  | 133:         | -17%:Fat (2.5%) used for cooking taken into account in the updated version - 50% cooked with fat + portion weight now excludes inedible part |
| Peppers (sweet) cooked with added fat: Fat specified as dairy spread, very low fat                                                             | :veg_pepper_bell        | 160:veg_pepper_bell_spread_dairy_vlowfat | 133:         | -17%:Fat (2.5%) used for cooking taken into account in the updated version - 50% cooked with fat + portion weight now excludes inedible part |
| Peppers (sweet) cooked with added fat: Fat specified as not known type of spread but ticked cholesterol lowering e.g Benecol, Flora pro active | :veg_pepper_bell        | 160:veg_pepper_bell_spread_dunno_chol    | 133:         | -17%:Fat (2.5%) used for cooking taken into account in the updated version - 50% cooked with fat + portion weight now excludes inedible part |
| Peppers (sweet) cooked with added fat: Fat specified as not known type of spread or amount of % fat                                            | :veg_pepper_bell        | 160:veg_pepper_bell_spread_dunno_dunno   | 133:         | -17%:Fat (2.5%) used for cooking taken into account in the updated version - 50% cooked with fat + portion weight now excludes inedible part |
| Peppers (sweet) cooked with added fat: Fat specified as not known type of spread but ticked normal amount % fat                                | :veg_pepper_bell        | 160:veg_pepper_bell_spread_dunno_fat     | 133:         | -17%:Fat (2.5%) used for cooking taken into account in the updated version - 50% cooked with fat + portion weight now excludes inedible part |
| Peppers (sweet) cooked with added fat: Fat specified as not known type of spread but ticked low fat                                            | :veg_pepper_bell        | 160:veg_pepper_bell_spread_dunno_lowfat  | 133:         | -17%:Fat (2.5%) used for cooking taken into account in the updated version - 50% cooked with fat + portion weight now excludes inedible part |
| Peppers (sweet) cooked with added fat: Fat specified as not known type of spread but ticked very low fat                                       | :veg_pepper_bell        | 160:veg_pepper_bell_spread_dunno_vlowfat | 133:         | -17%:Fat (2.5%) used for cooking taken into account in the updated version - 50% cooked with fat + portion weight now excludes inedible part |
| Peppers (sweet) cooked with added fat: Fat specified as cholesterol lowering olive spread e.g Benecol/Flora pro active olive spread            | :veg_pepper_bell        | 160:veg_pepper_bell_spread_olive_chol    | 133:         | -17%:Fat (2.5%) used for cooking taken into account in the updated version - 50% cooked with fat + portion weight now excludes inedible part |
| Peppers (sweet) cooked with added fat: Fat specified as olive spread but not specified amount of fat                                           | :veg_pepper_bell        | 160:veg_pepper_bell_spread_olive_dunno   | 133:         | -17%:Fat (2.5%) used for cooking taken into account in the updated version - 50% cooked with fat + portion weight now excludes inedible part |
| Peppers (sweet) cooked with added fat: Fat specified as olive spread with normal amount of % fat                                               | :veg_pepper_bell        | 160:veg_pepper_bell_spread_olive_fat     | 133:         | -17%:Fat (2.5%) used for cooking taken into account in the updated version - 50% cooked with fat + portion weight now excludes inedible part |
| Peppers (sweet) cooked with added fat: Fat specified as olive spread, low fat                                                                  | :veg_pepper_bell        | 160:veg_pepper_bell_spread_olive_lowfat  | 133:         | -17%:Fat (2.5%) used for cooking taken into account in the updated version - 50% cooked with fat + portion weight now excludes inedible part |
| Peppers (sweet) cooked with added fat: Fat specified as olive spread, very low fat                                                             | :veg_pepper_bell        | 160:veg_pepper_bell_spread_olive_vlowfat | 133:         | -17%:Fat (2.5%) used for cooking taken into account in the updated version - 50% cooked with fat + portion weight now excludes inedible part |
| Pulses e.g kidney beans, chick peas, butter beans or lentils                                                                                   | :veg_pulses             | 70:veg_pulses                            | 70:          | 0%:                                                                                                                                          |
| Salad cream or mayonnaise                                                                                                                      | :veg_saladmayo          | 120:veg_saladmayo                        | 120:         | 0%:                                                                                                                                          |
| Mixed side salad                                                                                                                               | :veg_sidesalad          | 66:veg_sidesalad                         | 66:          | 0%:                                                                                                                                          |
| Spinach                                                                                                                                        | :veg_spinach            | 90:veg_spinach                           | 90:          | 0%:                                                                                                                                          |
| Sprouts                                                                                                                                        | :veg_sprouts            | 90:veg_sprouts                           | 90:          | 0%:                                                                                                                                          |
| Sweetcorn, corn on the cob                                                                                                                     | :veg_sweetcorn          | 43:veg_sweetcorn                         | 43:          | 0%:                                                                                                                                          |
| Sweet potato                                                                                                                                   | :veg_sweetpot           | 130:veg_sweetpot                         | 130:         | 0%:                                                                                                                                          |
| Tomatoes fresh raw                                                                                                                             | :veg_tomato_fresh       | 85:veg_tomato_fresh                      | 85:          | 0%:                                                                                                                                          |
| Tomatoes canned or cooked                                                                                                                      | :veg_tomato_tinned      | 135:veg_tomato_tinned                    | 135:         | 0%:                                                                                                                                          |
| Turnips                                                                                                                                        | :veg_turnip             | 60:veg_turnip                            | 60:          | 0%:                                                                                                                                          |
| Watercress                                                                                                                                     | :veg_watercress         | 20:veg_watercress                        | 20:          | 0%:                                                                                                                                          |
| Yeast extract e.g Marmite, Vegemite                                                                                                            | :yeast_extract          | 9:yeast_extract                          | 4:           | -56%:Weight now reflects a thick spread (MAFF)                                                                                               |
| Yogurt full fat, plain or with fruit                                                                                                           | :yogurt_fullfat         | 125:yogurt_fullfat                       | 125:         | 0%:                                                                                                                                          |
| Yogurt low fat, plain or with fruit                                                                                                            | :yogurt_lowfat          | 125:yogurt_lowfat                        | 125:         | 0%:                                                                                                                                          |
| Yorkshire pudding                                                                                                                              | :yorkshirepud           | 80:yorkshirepud                          | 25:          | -69%:Portion size amended to reflect shop-bought muffin-sized unit                                                                           |
